# Supplementary material
Source: PubMed Central journal article supplement (PMC152272)
Supplement: pnas_0535768100_1.pdf [file pnas_0535768100_1.pdf]

Table 2. Decoy target structures

| Decoy source  | Oligomerization state | Target names and PDB identification codes                                                                                                                               |
|---------------|-----------------------|-------------------------------------------------------------------------------------------------------------------------------------------------------------------------|
| EMBL_misfold  | Monomer               | 1bp2, 1cbh, 1fdx, 1lh1, 1p2p, 1rhd, 1rn3, 1sn3, 2b5c, 2cdv, 2cyp, 2i1b, 2paz                                                                                            |
|               | Dimer                 | 1hip, 1ppt, 1rei, 2ssi, 2ts1, 5pad                                                                                                                                      |
|               | Oligomer              | 2ci2(hexamer), 2cro(trimer), 2tmn(tetramer)                                                                                                                             |
| CASP1         | Monomer               | crabpii (1cbr), EDN (1gqv), MCHPR (1pch), P450 (1jio)                                                                                                                   |
|               | Dimer+oligomer        | Halofer (1doi, hexamer), NDK (1nue, hexamer)                                                                                                                            |
| 4state        | Monomer               | 1r69, 1sn3, 3icb, 4pti, 4rxn                                                                                                                                            |
|               | Dimer+oligomer        | 1ctf(dimer), 2cro(trimer)                                                                                                                                               |
| lattice_ssfit | Monomer               | 1fca, 1nkl, 1pgb, 1trl-A, 4icb                                                                                                                                          |
|               | Dimer                 | 1beo(dimer), 1ctf(dimer), 1dkt-A(dimer)                                                                                                                                 |
| lmds          | Monomer               | 1igd, 2ovo, 4pti                                                                                                                                                        |
|               | Dimer+oligomer        | 1ctf(dimer), 1shf-A(tetramer), 2cro(trimer), 1b0n-B (heterodimer), 1fc2-C (heterodimer)                                                                                 |
| Rosetta       | Monomer               | 1acf, 1msi, 1orc, 1pal, 1r69, 1who, 4fgf, 5icb(4icb), 5pti                                                                                                              |
|               | Dimer                 | 1ail, 1bdo, 1csp, 1ctf, 1erv, 1gvp, 1kte, 1pdo, 1utg, 1vls, 2acy                                                                                                        |
|               | Oligomer              | 1aa2(heterotetramer), 2fha(24-mer), 1ris(tetramer)                                                                                                                      |
| CASP4         | Monomer               | T0086(1fw9), T0089(1e4f), T0103(1ga6), T0107(1i8u), T0116(1ewq), T0125(1gak), T0127(1g8p)                                                                               |
|               | Dimer                 | T0087(1i74), T0090(1g0s), T0092(1im8), T0094(1fsi), T0096(1e2x), T0100(1qjv), T0108(1j83), T0117(1j90), T0121(1g29), T0122(1geq), T0123(1exs), T0124(1jad), T0126(1f35) |
|               | Oligomer              | T0098(1fc3, trimer), T0106(1ijx, hexamer), T0111(1e9i, tetramer), T0112(1e3j, tetramer), T0113(1e3w, tetramer), T0115(1fwk, tetramer), T0118(1fzr, tetramer)            |
