# Supplementary material
Source: PubMed Central journal article supplement (PMC152272)
Supplement: pnas_0535768100_2.pdf [file pnas_0535768100_2.pdf]

Table 3. Atom-atom contact potentials

|    |         | 1<br>ALA<br>N | 2<br>ALA<br>CA | 3<br>ALA<br>C | 4<br>ALA<br>O | 5<br>ALA<br>CB |     |         | 1<br>ALA<br>N | 2<br>ALA<br>CA | 3<br>ALA<br>C | 4<br>ALA<br>O | 5<br>ALA<br>CB |
|----|---------|---------------|----------------|---------------|---------------|----------------|-----|---------|---------------|----------------|---------------|---------------|----------------|
| 0  | SAS SAS | 1.82          | 1.23           | 2.00          | 1.14          | 0.89           | 83  | LEU CB  | 0.70          | -1.07          | 0.17          | -1.19         | -0.66          |
| 1  | ALA N   | 1.57          | 0.60           | -2.51         | -2.01         | 0.35           | 84  | LEU CG  | 0.64          | -0.69          | -0.51         | -1.15         | -0.67          |
| 2  | ALA CA  | 0.63          | -0.47          | 0.40          | -0.53         | -0.98          | 85  | LEU CD1 | 0.18          | -1.10          | -0.99         | -0.19         | -0.88          |
| 3  | ALA C   | -2.48         | 0.41           | 1.11          | 1.07          | -0.46          | 86  | LEU CD2 | 0.43          | -0.81          | -0.67         | 0.01          | -0.93          |
| 4  | ALA O   | -2.02         | -0.55          | 1.11          | 0.84          | -0.91          | 87  | LYS N   | 1.89          | 1.13           | -2.52         | -1.93         | 0.84           |
| 5  | ALA CB  | 0.39          | -0.97          | -0.44         | -0.91         | -0.43          | 88  | LYS CA  | 1.18          | 0.04           | 1.18          | -0.61         | -0.75          |
| 6  | ARG N   | 1.33          | 0.75           | -2.61         | -1.95         | 0.76           | 89  | LYS C   | -2.38         | 0.73           | 1.34          | 1.00          | -0.16          |
| 7  | ARG CA  | 0.66          | -0.43          | 0.29          | -0.61         | -0.83          | 90  | LYS O   | -1.70         | -0.42          | 0.76          | 0.94          | -0.60          |
| 8  | ARG C   | -2.55         | 0.28           | 1.70          | 0.81          | -0.19          | 91  | LYS CB  | 1.19          | -0.91          | 0.23          | -1.11         | 0.06           |
| 9  | ARG O   | -1.87         | -0.39          | 0.75          | 0.83          | -0.67          | 92  | LYS CG  | 1.52          | -0.12          | 0.08          | -0.66         | 0.05           |
| 10 | ARG CB  | 0.72          | -1.03          | 0.09          | -1.18         | -0.24          | 93  | LYS CD  | 1.54          | -0.59          | 0.02          | -0.07         | 0.32           |
| 11 | ARG CG  | 0.82          | -0.37          | -0.15         | -0.77         | -0.20          | 94  | LYS CE  | 1.58          | 0.15           | 0.15          | -0.12         | 0.36           |
| 12 | ARG CD  | 1.04          | -0.65          | -0.43         | -0.49         | 0.10           | 95  | LYS NZ  | 1.65          | 0.75           | 0.83          | -0.03         | 0.99           |
| 13 | ARG NE  | 1.26          | -0.56          | 0.04          | -0.38         | 0.14           | 96  | MET N   | 1.70          | 1.16           | -2.30         | -1.99         | 0.71           |
| 14 | ARG CZ  | 0.85          | -1.28          | -0.43         | -0.13         | -0.57          | 97  | MET CA  | 0.95          | -0.12          | 0.55          | -0.57         | -1.01          |
| 15 | ARG NH1 | 0.71          | -0.41          | -0.37         | -0.25         | 0.06           | 98  | MET C   | -2.48         | 0.81           | 2.83          | 0.74          | -0.46          |
| 16 | ARG NH2 | 0.75          | -0.29          | -0.07         | -0.07         | 0.01           | 99  | MET O   | -2.01         | -0.58          | 1.10          | 0.50          | -0.81          |
| 17 | ASN N   | 1.72          | 0.49           | -2.42         | -1.73         | 0.84           | 100 | MET CB  | 0.48          | -0.97          | -0.09         | -1.12         | -0.59          |
| 18 | ASN CA  | 0.68          | -0.15          | 0.98          | -0.53         | -0.50          | 101 | MET CG  | 0.56          | -0.62          | -0.37         | -0.73         | -0.70          |
| 19 | ASN C   | -2.24         | 0.08           | 2.06          | 0.28          | -0.11          | 102 | MET SD  | 0.15          | -1.24          | -0.63         | 0.42          | -0.93          |
| 20 | ASN O   | -1.72         | -0.30          | 1.06          | 0.85          | -0.56          | 103 | MET CE  | 0.04          | -0.90          | -1.05         | -0.22         | -0.79          |
| 21 | ASN CB  | 0.82          | -0.70          | 0.52          | -0.81         | -0.05          | 104 | PHE N   | 1.88          | 0.65           | -2.42         | -1.91         | 0.66           |
| 22 | ASN CG  | 0.03          | -0.42          | 0.60          | -0.31         | -0.47          | 105 | PHE CA  | 0.54          | -0.51          | 1.25          | -0.78         | -0.89          |
| 23 | ASN OD1 | -0.77         | -0.39          | 0.43          | 0.39          | -0.26          | 106 | PHE C   | -2.38         | -0.10          | 2.14          | 0.65          | -0.30          |
| 24 | ASN ND2 | 0.26          | -0.40          | -0.08         | -0.36         | -0.06          | 107 | PHE O   | -1.88         | -0.83          | 0.56          | 0.47          | -0.65          |
| 25 | ASP N   | 1.68          | 1.09           | -2.51         | -1.70         | 0.58           | 108 | PHE CB  | 0.38          | -0.85          | 0.03          | -0.93         | -0.48          |
| 26 | ASP CA  | 0.58          | 0.12           | 1.36          | -0.29         | -0.70          | 109 | PHE CG  | 0.65          | -0.98          | 0.36          | 0.39          | -0.96          |
| 27 | ASP C   | -2.42         | 0.79           | 3.33          | 1.12          | -0.24          | 110 | PHE CD1 | 0.33          | -0.86          | -1.00         | -0.47         | -0.77          |
| 28 | ASP O   | -1.95         | -0.34          | 1.02          | 1.19          | -0.73          | 111 | PHE CD2 | 0.14          | -0.83          | -1.01         | -0.24         | -0.71          |
| 29 | ASP CB  | 0.64          | -0.60          | 0.72          | -0.61         | -0.13          | 112 | PHE CE1 | 0.24          | -0.81          | -1.04         | -0.11         | -0.96          |
| 30 | ASP CG  | -0.27         | -0.14          | 0.58          | -0.19         | -0.43          | 113 | PHE CE2 | 0.27          | -0.84          | -0.84         | 0.13          | -0.91          |
| 31 | ASP OD1 | -0.82         | 0.33           | 1.05          | 0.97          | 0.01           | 114 | PHE CZ  | 0.30          | -0.84          | -0.59         | 0.15          | -0.96          |
| 32 | ASP OD2 | 0.01          | -0.18          | 0.90          | 1.07          | 0.16           | 115 | PRO N   | 1.98          | 0.52           | -1.36         | -1.17         | 0.04           |
| 33 | CYS N   | 2.08          | 1.35           | -2.53         | -1.91         | 0.19           | 116 | PRO CA  | 0.81          | -0.15          | -0.01         | -0.57         | -0.41          |
| 34 | CYS CA  | 0.84          | -0.35          | 0.64          | -0.47         | -0.82          | 117 | PRO C   | -2.45         | 0.79           | 0.85          | 0.84          | -0.18          |
| 35 | CYS C   | -2.20         | 0.66           | 1.70          | 0.44          | -0.44          | 118 | PRO O   | -1.75         | -0.25          | 1.12          | 0.95          | -0.68          |
| 36 | CYS O   | -1.93         | -0.68          | 0.77          | 0.28          | -0.70          | 119 | PRO CB  | 0.21          | -0.12          | -0.31         | -0.10         | -0.37          |
| 37 | CYS CB  | 0.25          | -0.59          | -0.26         | -1.01         | -0.66          | 120 | PRO CG  | 0.47          | -0.31          | -0.41         | -0.17         | -0.34          |
| 38 | CYS SG  | -0.25         | -0.65          | -0.79         | -0.15         | -0.67          | 121 | PRO CD  | 1.11          | -0.13          | -1.34         | -0.91         | -0.17          |
| 39 | GLN N   | 2.03          | 0.95           | -2.64         | -1.83         | 0.69           | 122 | SER N   | 1.61          | 0.83           | -2.18         | -1.73         | 0.31           |
| 40 | GLN CA  | 0.63          | 0.14           | 0.63          | -0.51         | -1.08          | 123 | SER CA  | 0.48          | -0.38          | 0.36          | -0.45         | -0.63          |
| 41 | GLN C   | -2.56         | 1.16           | 1.63          | 1.05          | -0.37          | 124 | SER C   | -2.35         | 0.35           | 2.14          | 1.11          | -0.11          |
| 42 | GLN O   | -1.83         | -0.17          | 0.91          | 1.05          | -0.70          | 125 | SER O   | -1.81         | -0.48          | 0.85          | 0.79          | -0.66          |
| 43 | GLN CB  | 0.95          | -0.79          | 0.62          | -0.93         | -0.11          | 126 | SER CB  | 0.21          | -0.47          | 0.01          | -0.70         | -0.23          |
| 44 | GLN CG  | 0.92          | -0.25          | -0.35         | -0.74         | 0.03           | 127 | SER OG  | -0.64         | -0.44          | 0.39          | -0.45         | -0.22          |
| 45 | GLN CD  | 1.20          | -0.87          | -0.02         | 0.30          | -0.39          | 128 | THR N   | 1.85          | 1.09           | -2.22         | -1.71         | 0.52           |
| 46 | GLN OE1 | -0.07         | -0.60          | 0.30          | 0.39          | 0.07           | 129 | THR CA  | 0.88          | -0.19          | 1.25          | -0.76         | -0.71          |
| 47 | GLN NE2 | 0.74          | -0.39          | 0.13          | -0.29         | 0.09           | 130 | THR C   | -2.43         | 0.75           | 1.95          | 0.92          | -0.38          |
| 48 | GLU N   | 2.08          | 1.52           | -2.67         | -1.94         | 0.77           | 131 | THR O   | -1.82         | -0.57          | 0.69          | 0.71          | -0.61          |
| 49 | GLU CA  | 0.96          | 0.84           | 0.96          | -0.24         | -0.90          | 132 | THR CB  | 0.19          | -0.71          | -0.04         | -0.79         | -0.28          |
| 50 | GLU C   | -2.62         | 1.49           | 3.36          | 1.09          | -0.04          | 133 | THR OG1 | -0.43         | -0.51          | 0.33          | -0.45         | -0.16          |
| 51 | GLU O   | -1.95         | -0.24          | 1.20          | 1.21          | -0.80          | 134 | THR CG2 | 0.44          | -0.41          | -0.54         | -0.14         | -0.46          |
| 52 | GLU CB  | 0.83          | -0.89          | 0.76          | -1.13         | 0.01           | 135 | TRP N   | 2.12          | 1.07           | -2.36         | -1.88         | 0.48           |
| 53 | GLU CG  | 0.60          | -0.13          | 0.27          | -0.39         | 0.01           | 136 | TRP CA  | 0.90          | 0.04           | 1.69          | -0.58         | -0.82          |
| 54 | GLU CD  | 1.06          | -0.57          | -0.06         | 0.86          | -0.12          | 137 | TRP C   | 0.00          | 1.15           | 4.00          | 0.61          | -0.14          |
| 55 | GLU OE1 | 0.43          | -0.40          | 0.73          | 1.14          | 0.47           | 138 | TRP O   | -1.99         | -0.67          | 1.11          | 0.64          | -0.68          |
| 56 | GLU OE2 | 0.51          | 0.23           | 0.70          | 1.23          | 0.48           | 139 | TRP CB  | 0.62          | -0.73          | 0.06          | -0.80         | -0.60          |
| 57 | GLY N   | 1.34          | 0.24           | -2.19         | -1.78         | 0.27           | 140 | TRP CG  | 0.41          | -0.93          | 0.40          | 0.62          | -0.86          |
| 58 | GLY CA  | 0.37          | -0.41          | 0.19          | -0.74         | -0.34          | 141 | TRP CD1 | 0.40          | -0.67          | -0.51         | -0.32         | -0.46          |
| 59 | GLY C   | -1.62         | -0.24          | 0.40          | 0.27          | -0.49          | 142 | TRP CD2 | 0.40          | -0.84          | 0.86          | 1.02          | -1.04          |
| 60 | GLY O   | -1.63         | -0.67          | 0.70          | 0.66          | -0.55          | 143 | TRP NE1 | 0.70          | -0.35          | -0.47         | -0.46         | -0.42          |
| 61 | HIS N   | 1.86          | 1.08           | -2.51         | -1.94         | 0.60           | 144 | TRP CE2 | 0.39          | -0.75          | 0.85          | 1.41          | -1.13          |
| 62 | HIS CA  | 0.41          | -0.29          | 0.99          | -0.40         | -0.68          | 145 | TRP CE3 | 0.24          | -0.78          | -1.15         | 0.02          | -0.92          |
| 63 | HIS C   | -2.19         | 1.26           | 3.14          | 0.39          | -0.35          | 146 | TRP CZ2 | 0.41          | -0.56          | -0.69         | -0.05         | -0.68          |
| 64 | HIS O   | -1.71         | -0.68          | 0.90          | 0.71          | -0.55          | 147 | TRP CZ3 | -0.09         | -0.81          | -1.08         | -0.02         | -0.84          |
| 65 | HIS CB  | 0.63          | -0.67          | 0.32          | -0.86         | -0.33          | 148 | TRP CH2 | 0.10          | -0.74          | -0.82         | 0.35          | -0.81          |
| 66 | HIS CG  | 0.40          | -0.46          | 0.78          | 0.25          | -0.66          | 149 | TYR N   | 1.67          | 0.70           | -2.27         | -1.93         | 0.68           |
| 67 | HIS ND1 | -0.08         | -0.55          | 0.01          | -0.24         | -0.19          | 150 | TYR CA  | 0.54          | -0.35          | 0.76          | -0.87         | -0.67          |
| 68 | HIS CD2 | 0.38          | -0.84          | -0.79         | -0.59         | -0.33          | 151 | TYR C   | -2.15         | 0.85           | 2.14          | 0.56          | -0.45          |
| 69 | HIS CE1 | 0.43          | -0.28          | -0.33         | -0.27         | -0.24          | 152 | TYR O   | -1.84         | -0.80          | 0.71          | 0.53          | -0.56          |
| 70 | HIS NE2 | 0.65          | -0.26          | 0.04          | -0.34         | 0.05           | 153 | TYR CB  | 0.70          | -0.86          | 0.15          | -0.92         | -0.67          |
| 71 | ILE N   | 1.34          | 0.98           | -2.33         | -2.02         | 0.69           | 154 | TYR CG  | 0.49          | -0.89          | -0.19         | 0.41          | -0.82          |
| 72 | ILE CA  | 0.64          | -0.63          | 1.75          | -1.11         | -0.95          | 155 | TYR CD1 | 0.24          | -0.71          | -0.99         | -0.33         | -0.61          |
| 73 | ILE C   | -2.67         | 0.59           | 3.20          | 0.94          | -0.19          | 156 | TYR CD2 | 0.26          | -1.00          | -0.76         | -0.40         | -0.58          |
| 74 | ILE O   | -1.97         | -0.75          | 0.69          | 0.44          | -0.69          | 157 | TYR CE1 | 0.23          | -0.62          | -0.70         | 0.04          | -0.70          |
| 75 | ILE CB  | 0.86          | -1.25          | 0.12          | -1.36         | -0.50          | 158 | TYR CE2 | 0.20          | -0.74          | -0.50         | 0.14          | -0.63          |
| 76 | ILE CG1 | 0.54          | -0.79          | -0.53         | -0.76         | -0.87          | 159 | TYR CZ  | 0.36          | -1.10          | -0.30         | 0.99          | -0.92          |
| 77 | ILE CG2 | 0.07          | -0.66          | -0.58         | -0.08         | -0.91          | 160 | TYR OH  | 0.22          | -0.46          | 0.09          | 0.33          | -0.31          |
| 78 | ILE CD1 | 0.24          | -1.13          | -0.95         | -0.11         | -0.96          | 161 | VAL N   | 1.33          | 0.76           | -2.16         | -2.10         | 0.63           |
| 79 | LEU N   | 1.80          | 0.92           | -2.47         | -2.10         | 0.74           | 162 | VAL CA  | 0.86          | -0.60          | 1.37          | -0.88         | -0.95          |
| 80 | LEU CA  | 0.89          | -0.31          | 1.60          | -0.84         | -1.10          | 163 | VAL C   | -2.61         | 0.59           | 2.71          | 1.04          | -0.49          |
| 81 | LEU C   | -2.46         | 0.57           | 1.05          | 0.80          | -0.34          | 164 | VAL O   | -2.09         | -0.95          | 0.73          | 0.38          | -0.73          |
| 82 | LEU O   | -1.93         | -0.62          | 0.80          | 0.63          | -0.71          | 165 | VAL CB  | 0.62          | -1.10          | 0.15          | -1.12         | -0.71          |
|    |         |               |                |               |               |                | 166 | VAL CG1 | 0.10          | -0.73          | -0.77         | -0.19         | -0.96          |
|    |         |               |                |               |               |                | 167 | VAL CG2 | 0.24          | -0.93          | -0.76         | -0.57         | -0.90          |

Potential coefficients are the negative log-odds ratio of the observed contact area frequencies to the expected frequencies, based on a random distribution of contacts.

Favorable (negative) contacts are shaded.

Table 3. (continued)

|        |     | 6 ARG<br>N | 7 ARG<br>CA | 8 ARG<br>C | 9 ARG<br>O | 10 ARG<br>CB | 11 ARG<br>CG | 12 ARG<br>CD | 13 ARG<br>NE | 14 ARG<br>CZ | 15 ARG<br>NH1 | 16 ARG<br>NH2 |         |     | 6 ARG<br>N | 7 ARG<br>CA | 8 ARG<br>C | 9 ARG<br>O | 10 ARG<br>CB | 11 ARG<br>CG | 12 ARG<br>CD | 13 ARG<br>NE | 14 ARG<br>CZ | 15 ARG<br>NH1 | 16 ARG<br>NH2 |
|--------|-----|------------|-------------|------------|------------|--------------|--------------|--------------|--------------|--------------|---------------|---------------|---------|-----|------------|-------------|------------|------------|--------------|--------------|--------------|--------------|--------------|---------------|---------------|
| 0 SAS  | SAS | 1.94       | 1.24        | 1.96       | 1.06       | 1.05         | 0.83         | 0.45         | 0.58         | 0.78         | 0.34          | 0.30          | 83 LEU  | CB  | 0.69       | -1.08       | 0.25       | -1.11      | -0.27        | -0.43        | 0.03         | 0.12         | -0.56        | 0.08          | 0.02          |
| 1 ALA  | N   | 1.34       | 0.41        | -2.57      | -1.87      | 0.70         | 0.79         | 1.02         | 1.23         | 0.81         | 0.68          | 0.73          | 84 LEU  | CG  | 0.75       | -0.32       | -0.42      | -1.10      | -0.28        | -0.30        | -0.03        | 0.09         | -0.69        | 0.21          | 0.31          |
| 2 ALA  | CA  | 1.09       | -0.43       | 0.29       | -0.36      | -1.03        | -0.38        | -0.66        | -0.57        | -1.27        | -0.42         | -0.29         | 85 LEU  | CD1 | 0.52       | -0.94       | -0.70      | 0.11       | -0.50        | -0.59        | -0.21        | -0.28        | -0.81        | 0.06          | 0.04          |
| 3 ALA  | C   | -2.58      | 0.27        | 1.70       | 0.74       | 0.09         | -0.16        | -0.44        | 0.05         | -0.43        | -0.36         | -0.06         | 86 LEU  | CD2 | 0.73       | -0.67       | -0.59      | 0.26       | -0.48        | -0.56        | -0.35        | -0.16        | -0.93        | -0.12         | -0.09         |
| 4 ALA  | O   | -1.96      | -0.64       | 0.82       | 0.83       | -1.18        | -0.76        | -0.47        | -0.35        | -0.14        | -0.22         | -0.03         | 87 LYS  | N   | 1.69       | 1.30        | -2.34      | -1.90      | 1.30         | 1.14         | 1.19         | 1.56         | 1.60         | 1.03          | 1.14          |
| 5 ALA  | CB  | 0.80       | -0.82       | -0.18      | -0.68      | -0.23        | -0.20        | 0.10         | 0.13         | -0.56        | 0.04          | -0.02         | 88 LYS  | CA  | 1.19       | 0.08        | 1.23       | -0.69      | -0.69        | -0.05        | -0.42        | -0.12        | -0.80        | -0.35         | -0.14         |
| 6 ARG  | N   | 1.63       | 1.39        | -2.27      | -1.77      | 0.88         | 1.16         | 1.39         | 1.45         | 1.20         | 0.84          | 0.91          | 89 LYS  | C   | -2.21      | 1.31        | 2.31       | 0.96       | 0.42         | -0.28        | -0.39        | 0.40         | -0.26        | -0.35         | 0.13          |
| 7 ARG  | CA  | 1.39       | -0.01       | 0.88       | -0.53      | -0.72        | -0.19        | -0.47        | -0.32        | -0.94        | -0.57         | -0.17         | 90 LYS  | O   | -1.67      | -0.44       | 1.00       | 0.92       | -0.86        | -0.66        | -0.21        | -0.24        | 0.57         | -0.12         | 0.13          |
| 8 ARG  | C   | -2.23      | 0.89        | 2.26       | 1.10       | -0.16        | -0.27        | -0.27        | 0.24         | 0.35         | -0.52         | 0.11          | 91 LYS  | CB  | 1.34       | -0.81       | 0.70       | -1.06      | 0.63         | 0.34         | 0.26         | 0.09         | -0.59        | 0.17          | 0.21          |
| 9 ARG  | O   | -1.78      | -0.57       | 1.13       | 0.90       | -1.00        | -0.55        | -0.15        | 0.06         | 0.53         | -0.36         | -0.10         | 92 LYS  | CG  | 1.06       | -0.05       | -0.50      | -0.76      | 0.41         | -0.14        | 0.40         | 0.26         | -0.62        | 0.10          | 0.00          |
| 10 ARG | CB  | 0.90       | -0.71       | -0.15      | -1.00      | -0.16        | 0.11         | 0.15         | 0.36         | -0.30        | 0.14          | 0.29          | 93 LYS  | CD  | 1.67       | -0.31       | 0.04       | 0.07       | 0.83         | 0.32         | 0.44         | 0.38         | -0.20        | 0.37          | 0.00          |
| 11 ARG | CG  | 1.19       | -0.18       | -0.26      | -0.56      | 0.11         | -0.11        | 0.04         | 0.05         | -0.56        | -0.04         | -0.06         | 94 LYS  | CE  | 1.98       | 0.23        | 0.39       | 0.15       | 0.72         | 0.46         | 0.60         | 0.47         | -0.11        | 0.40          | -0.02         |
| 12 ARG | CD  | 1.41       | -0.45       | -0.25      | -0.18      | 0.16         | 0.04         | -0.09        | -0.05        | -0.73        | 0.08          | -0.13         | 95 LYS  | NZ  | 2.17       | 0.73        | 1.18       | 0.28       | 1.36         | 0.85         | 0.96         | 1.03         | 0.88         | 0.61          | 0.44          |
| 13 ARG | NE  | 1.47       | -0.30       | 0.22       | 0.03       | 0.37         | 0.08         | -0.05        | 0.05         | -0.70        | 0.06          | -0.05         | 96 MET  | N   | 0.93       | 1.52        | -2.46      | -1.80      | 1.02         | 1.14         | 1.38         | 1.40         | 0.53         | 0.94          | 0.87          |
| 14 ARG | CZ  | 1.24       | -0.93       | 0.35       | 0.52       | -0.30        | -0.58        | -0.76        | -0.69        | -1.39        | -0.17         | -0.33         | 97 MET  | CA  | 1.19       | 0.39        | 0.35       | -0.88      | -0.94        | 0.11         | -0.12        | 0.04         | -0.73        | -0.24         | -0.16         |
| 15 ARG | NH1 | 0.87       | -0.55       | -0.53      | -0.38      | 0.16         | -0.02        | 0.10         | 0.06         | -0.19        | 0.08          | -0.08         | 98 MET  | C   | -2.62      | 1.35        | 0.84       | 0.40       | -0.18        | -0.17        | -0.11        | 0.63         | 0.73         | 0.01          | 0.12          |
| 16 ARG | NH2 | 0.94       | -0.16       | 0.10       | -0.12      | 0.31         | -0.04        | -0.12        | -0.05        | -0.34        | -0.07         | -0.13         | 99 MET  | O   | -1.91      | -0.67       | 0.53       | 0.78       | -0.89        | -0.49        | -0.19        | -0.28        | 1.09         | -0.14         | 0.03          |
| 17 ASN | N   | 1.44       | 0.73        | -2.40      | -1.80      | 0.73         | 0.71         | 1.25         | 1.51         | 1.74         | 0.45          | 0.72          | 100 MET | CB  | 1.11       | -0.71       | -0.26      | -0.90      | -0.01        | -0.09        | 0.23         | 0.22         | -0.17        | 0.31          | 0.28          |
| 18 ASN | CA  | 0.68       | -0.51       | 0.40       | -0.81      | -1.29        | -0.69        | -0.90        | -0.82        | -0.68        | -0.65         | -0.58         | 101 MET | CG  | 0.91       | -0.10       | -0.13      | -0.54      | -0.02        | -0.43        | 0.01         | -0.24        | -0.78        | 0.06          | -0.11         |
| 19 ASN | C   | -2.30      | 0.02        | 1.66       | 0.31       | 0.01         | -0.58        | -0.48        | -0.29        | -0.39        | -0.44         | -0.27         | 102 MET | CD  | 0.24       | -0.92       | -0.89      | 0.40       | -0.58        | -0.55        | -0.68        | -0.25        | -0.62        | 0.03          | 0.28          |
| 20 ASN | O   | -1.84      | -0.50       | 0.82       | 0.91       | -1.03        | -0.95        | -0.45        | -0.47        | -0.03        | -0.57         | -0.26         | 103 MET | CE  | 0.45       | -0.43       | -0.83      | 0.04       | -0.35        | -0.40        | -0.15        | -0.20        | -0.82        | -0.05         | 0.07          |
| 21 ASN | CB  | 1.02       | -0.66       | 0.08       | -0.82      | 0.03         | -0.21        | -0.04        | 0.02         | -0.59        | -0.18         | -0.18         | 104 PHE | N   | 2.35       | 0.84        | -2.34      | -1.87      | 0.79         | 0.80         | 1.36         | 1.19         | 0.95         | 1.05          | 0.99          |
| 22 ASN | CG  | -0.03      | -0.68       | 1.01       | -0.74      | -0.77        | -0.75        | -0.55        | -0.19        | -0.94        | -0.35         | -0.34         | 105 PHE | CA  | 0.85       | -0.26       | 0.78       | -0.94      | -0.65        | -0.51        | -0.26        | 0.12         | -0.59        | -0.11         | -0.26         |
| 23 ASN | OD1 | -0.73      | -0.59       | 0.18       | 0.23       | -0.68        | -0.38        | -0.71        | -0.81        | -0.32        | -0.79         | -0.61         | 106 PHE | C   | -2.45      | 0.08        | 1.37       | 0.48       | 0.30         | -0.40        | -0.12        | 0.03         | 0.48         | 0.10          | -0.20         |
| 24 ASN | ND2 | 0.37       | -0.25       | -0.30      | -0.61      | -0.35        | -0.27        | -0.27        | -0.01        | -0.12        | -0.23         | -0.05         | 107 PHE | O   | -1.79      | -0.91       | 0.74       | 0.50       | -0.87        | -0.59        | -0.31        | -0.25        | 0.55         | -0.29         | -0.20         |
| 25 ASP | N   | 1.57       | 1.28        | -2.44      | -1.99      | 0.09         | 0.68         | 1.11         | 0.60         | 0.56         | 0.05          | 0.01          | 108 PHE | CB  | 0.78       | -0.82       | 0.29       | -0.81      | -0.39        | -0.33        | -0.29        | -0.10        | -0.74        | -0.07         | -0.04         |
| 26 ASP | CA  | 0.69       | -0.28       | 0.64       | -0.53      | -1.35        | -0.77        | -1.02        | -0.95        | -1.26        | -1.28         | -1.12         | 109 PHE | CG  | 1.28       | -0.52       | 0.27       | 0.53       | -0.84        | -1.09        | -1.01        | -0.50        | -1.35        | -0.30         | -0.11         |
| 27 ASP | C   | -2.74      | 1.05        | 2.55       | 0.71       | 0.09         | -0.43        | -0.17        | -0.32        | -0.48        | -0.59         | -0.34         | 110 PHE | CD1 | 0.82       | -0.73       | -1.04      | -0.24      | -0.44        | -0.63        | -0.47        | -0.24        | -0.81        | -0.09         | 0.00          |
| 28 ASP | O   | -2.24      | -0.57       | 1.09       | 0.96       | -1.35        | -1.05        | -0.43        | -0.52        | -0.14        | -0.53         | -0.56         | 111 PHE | CD2 | 0.41       | -0.72       | -0.95      | -0.30      | -0.53        | -0.44        | -0.43        | -0.29        | -1.06        | -0.09         | -0.07         |
| 29 ASP | CB  | 0.37       | -0.66       | 0.46       | -0.86      | -0.46        | -0.56        | -0.37        | -0.45        | -0.74        | -0.65         | -0.62         | 112 PHE | CE1 | 0.45       | -0.60       | -0.84      | -0.03      | -0.86        | -0.61        | -0.52        | -0.26        | -1.00        | -0.07         | -0.03         |
| 30 ASP | CG  | -0.53      | -0.05       | 1.50       | -0.99      | -1.22        | -1.02        | -0.98        | -1.45        | -0.44        | -1.06         | -1.29         | 113 PHE | CE2 | 0.58       | -0.82       | -0.89      | 0.02       | -0.76        | -0.58        | -0.60        | -0.24        | -0.70        | 0.09          | 0.09          |
| 31 ASP | OD1 | -1.31      | -0.28       | 0.48       | 0.56       | -0.98        | -0.83        | -0.94        | -2.00        | 0.02         | -1.49         | -1.66         | 114 PHE | CZ  | 0.21       | -0.88       | -0.69      | 0.27       | -0.74        | -0.61        | -0.73        | -0.23        | -0.98        | -0.04         | 0.02          |
| 32 ASP | OD2 | -0.82      | -0.39       | 0.90       | 0.60       | -0.76        | -0.58        | -0.85        | -1.82        | -0.16        | -1.32         | -1.61         | 115 PRO | N   | 1.66       | 0.00        | -1.29      | -1.40      | 0.52         | -0.08        | 0.26         | -0.18        | -0.82        | -0.26         | -0.21         |
| 33 CYS | N   | 2.59       | 0.41        | -2.25      | -1.67      | 0.93         | 1.27         | 1.16         | 1.04         | 1.51         | 0.73          | 1.12          | 116 PRO | CA  | 1.82       | -0.48       | 0.18       | -0.68      | -0.67        | -0.56        | -0.42        | -0.38        | -1.12        | -0.66         | -0.45         |
| 34 CYS | CA  | 0.52       | -0.26       | 1.02       | -1.05      | -1.10        | -0.07        | -0.21        | -0.52        | 0.08         | -0.15         | 0.22          | 117 PRO | C   | -2.33      | 1.50        | 2.77       | 1.84       | 0.22         | -0.39        | -0.62        | -0.13        | -0.32        | -0.49         | -0.49         |
| 35 CYS | C   | -2.27      | 0.69        | 1.40       | 0.18       | 0.11         | -0.49        | -0.15        | 0.34         | 0.77         | -0.08         | -0.31         | 118 PRO | O   | -1.69      | -0.31       | 0.37       | 1.12       | -0.81        | -0.87        | -0.72        | -0.69        | 0.17         | -0.72         | -0.60         |
| 36 CYS | O   | -1.60      | -1.09       | 0.51       | 0.30       | -0.65        | -0.57        | -0.36        | -0.37        | -0.21        | -0.47         | -0.38         | 119 PRO | CB  | 0.37       | 0.08        | -0.48      | 0.04       | -0.06        | -0.38        | -0.33        | -0.18        | -0.82        | -0.27         | -0.18         |
| 37 CYS | CB  | 0.68       | -0.71       | -0.73      | -0.68      | -0.43        | -0.57        | -0.20        | -0.38        | -0.49        | 0.28          | 0.24          | 120 PRO | CG  | 1.27       | -0.25       | -0.41      | -0.24      | -0.24        | -0.18        | -0.03        | -0.18        | -0.98        | -0.17         | -0.30         |
| 38 CYS | SG  | 0.02       | -0.86       | -0.81      | -0.01      | -0.62        | -0.47        | -0.12        | -0.01        | -0.59        | 0.29          | 0.31          | 121 PRO | CD  | 1.30       | 0.15        | -1.61      | -1.11      | 0.07         | 0.13         | -0.04        | 0.03         | -0.53        | -0.20         | -0.29         |
| 39 GLN | N   | 1.56       | 1.19        | -2.61      | -2.12      | 1.18         | 0.97         | 1.26         | 1.53         | 1.05         | 0.64          | 1.07          | 122 SER | N   | 1.48       | 1.11        | -2.21      | -1.68      | 0.60         | 0.44         | 0.70         | 1.24         | 0.64         | 0.40          | 0.68          |
| 40 GLN | CA  | 1.70       | -0.59       | 0.61       | -0.77      | -1.10        | -0.47        | -0.77        | -0.35        | -1.15        | -0.63         | -0.37         | 123 SER | CA  | 0.84       | -0.38       | 1.21       | -0.43      | -0.56        | -0.43        | -0.35        | -0.36        | -0.91        | -0.56         | -0.43         |
| 41 GLN | C   | -2.48      | 1.14        | 2.38       | 0.61       | -0.01        | -0.10        | 0.14         | 0.01         | -0.53        | -0.27         | -0.02         | 124 SER | C   | -2.41      | 0.88        | 2.98       | 1.03       | 0.02         | -0.49        | -0.44        | -0.22        | -0.70        | -0.69         | -0.21         |
| 42 GLN | O   | -2.03      | -0.67       | 0.85       | 0.67       | -1.19        | -0.83        | -0.25        | -0.12        | -0.19        | -0.15         | 0.00          | 125 SER | O   | -1.90      | -0.67       | 0.63       | 0.52       | -0.91        | -0.88        | -0.54        | -0.58        | 0.28         | -0.50         | -0.37         |
| 43 GLN | CB  | 0.66       | -1.11       | 0.51       | -1.15      | -0.37        | -0.42        | -0.23        | 0.00         | -0.48        | -0.48         | -0.25         | 126 SER | CB  | 0.76       | -0.33       | 0.00       | -0.51      | -0.18        | -0.36        | -0.11        | -0.05        | -0.39        | -0.27         | -0.13         |
| 44 GLN | CG  | 1.01       | -0.35       | -0.31      | -0.95      | 0.06         | -0.51        | -0.06        | -0.11        | -0.73        | -0.16         | -0.12         | 127 SER | OG  | -0.66      | -0.55       | 0.27       | -0.23      | -0.63        | -0.39        | -0.44        | -0.42        | 0.05         | -0.35         | -0.19         |
| 45 GLN | CD  | 1.28       | -0.86       | 0.04       | 0.23       | -0.71        | -1.21        | -0.93        | -0.38        | -1.23        | -0.49         | -0.41         | 128 THR | N   | 1.05       | 0.83        | -2.31      | -1.83      | 0.48         | 0.87         | 1.02         | 0.73         | 1.70         | 0.50          | 0.65          |
| 46 GLN | OE1 | -0.06      | -1.01       | 0.59       | 0.46       | -0.22        | -0.56        | -0.96        | -0.95        | -0.15        | -0.98         | -0.73         | 129 THR | CA  | 0.83       | -0.82       | 0.45       | -1.03      | -1.04        | -0.42        | -0.65        | -0.17        | -0.57        | -0.53         | -0.39         |
| 47 GLN | NE2 | 0.66       | -0.64       | -0.20      | -0.20      | -0.21        | -0.31        | -0.45        | -0.20        | -0.24        | -0.13         | -0.12         | 130 THR | C   | -2.43      | 0.35        | 0.45       | 0.64       | -0.24        | -0.50        | -0.22        | -0.19        | -0.20        | -0.42         | -0.26         |
| 48 GLU | N   | 1.57       | 1.61        | -2.63      | -2.29      | 0.63         | 0.72         | 1.19         | 1.22         | 0.92         | 0.72          | 0.61          | 131 THR | O   | -1.97      | -0.86       | 0.69       | 0.62       | -1.07        | -0.71        | -0.15        | -0.39        | -0.44        | -0.38         | -0.28         |
| 49 GLU | CA  | 1.02       | -0.52       | 0.20       | -0.66      | -1.43        | -0.65        | -0.86        | -0.81        | -1.26        | -0.62         | -0.56         | 132 THR | CB  | 0.46       | -0.69       | 0.07       | -0.82      | -0.36        | -0.48        | -0.15        | -0.13        | -0.49        | -0.04         | 0.00          |
| 50 GLU | C   | -2.69      | 0.30        | -1.62      | 0.40       | 0.07         | -0.15        | -0.09        | -0.25        | -0.33        | -0.44         | -0.11         | 133 THR | OG1 | -0.51      | -0.51       | 0.65       | -0.35      | -0.67        | -0.56        | -0.53        | -0.51        | 0.31         | -0.25         | -0.11         |
| 51 GLU | O   | -2.38      | -0.59       | 0.41       | 0.63       | -1.49        | -1.11        | -0.28        | -0.30        | 0.00         | -0.27         | -0.28         | 134 THR | CG2 | 0.45       | -0.31       | -0.43      | -0.23      | -0.36        | -0.          |              |              |              |               |               |

Table 3. (continued)

|    |         | 17<br>ASN<br>N | 18<br>ASN<br>CA | 19<br>ASN<br>C | 20<br>ASN<br>O | 21<br>ASN<br>CB | 22<br>ASN<br>CG | 23<br>ASN<br>OD1 | 24<br>ASN<br>ND2 |     |         | 17<br>ASN<br>N | 18<br>ASN<br>CA | 19<br>ASN<br>C | 20<br>ASN<br>O | 21<br>ASN<br>CB | 22<br>ASN<br>CG | 23<br>ASN<br>OD1 | 24<br>ASN<br>ND2 |
|----|---------|----------------|-----------------|----------------|----------------|-----------------|-----------------|------------------|------------------|-----|---------|----------------|-----------------|----------------|----------------|-----------------|-----------------|------------------|------------------|
| 0  | SAS SAS | 1.80           | 1.16            | 1.76           | 0.92           | 0.70            | 0.87            | 0.37             | 0.34             | 83  | LEU CB  | 1.08           | -0.78           | 0.68           | -0.91          | -0.08           | -0.67           | -0.28            | 0.01             |
| 1  | ALA N   | 1.72           | 0.68            | -2.27          | -1.71          | 0.81            | 0.00            | -0.75            | 0.23             | 84  | LEU CG  | 0.55           | -0.33           | -0.34          | -0.82          | -0.17           | -0.52           | 0.05             | 0.10             |
| 2  | ALA CA  | 0.51           | -0.15           | 0.10           | -0.29          | -0.70           | -0.41           | -0.38            | -0.42            | 85  | LEU CD1 | 0.75           | -0.66           | -0.63          | 0.21           | -0.35           | -0.44           | 0.19             | 0.21             |
| 3  | ALA C   | -2.39          | 0.99            | 2.06           | 1.04           | 0.53            | 0.60            | 0.44             | -0.06            | 86  | LEU CD2 | 0.80           | -0.48           | -0.30          | 0.30           | -0.32           | -0.53           | 0.27             | 0.22             |
| 4  | ALA O   | -1.73          | -0.54           | 0.28           | 0.85           | -0.81           | -0.32           | 0.41             | -0.35            | 87  | LYS N   | 1.88           | 0.52            | -2.49          | -1.95          | 1.10            | 0.26            | -0.80            | 0.54             |
| 5  | ALA CB  | 0.86           | -0.49           | -0.09          | -0.57          | -0.05           | -0.46           | -0.30            | -0.09            | 88  | LYS CA  | 1.00           | -0.27           | 0.84           | -0.63          | -0.51           | -0.36           | -0.51            | -0.30            |
| 6  | ARG N   | 1.44           | 0.67            | -2.34          | -1.84          | 0.99            | -0.07           | -0.71            | 0.34             | 89  | LYS C   | -2.43          | 0.96            | 2.78           | 0.65           | 0.09            | 0.06            | 0.25             | -0.39            |
| 7  | ARG CA  | 0.75           | -0.51           | 0.00           | -0.48          | -0.67           | -0.67           | -0.58            | -0.27            | 90  | LYS O   | -1.73          | -0.73           | 0.54           | 0.90           | -0.78           | -0.80           | 0.36             | -0.36            |
| 8  | ARG C   | -2.37          | 0.37            | 1.66           | 0.82           | 0.08            | 1.01            | 0.20             | -0.29            | 91  | LYS CB  | 0.89           | -1.11           | 0.09           | -0.97          | 0.03            | -0.79           | -0.57            | -0.20            |
| 9  | ARG O   | -1.81          | -0.81           | 0.33           | 0.91           | -0.83           | -0.75           | 0.26             | -0.59            | 92  | LYS CG  | 1.10           | -0.66           | -0.57          | -0.90          | -0.06           | -0.88           | -0.43            | -0.18            |
| 10 | ARG CB  | 0.74           | -1.28           | 0.01           | -1.03          | 0.03            | -0.76           | -0.68            | -0.37            | 93  | LYS CD  | 1.30           | -0.75           | -0.20          | -0.13          | 0.07            | -0.52           | -0.57            | -0.30            |
| 11 | ARG CG  | 0.72           | -0.68           | -0.58          | -0.94          | -0.21           | -0.72           | -0.40            | -0.28            | 94  | LYS CE  | 1.37           | -0.38           | -0.12          | -0.16          | 0.15            | -0.35           | -0.64            | -0.19            |
| 12 | ARG CD  | 1.25           | -0.89           | -0.47          | -0.46          | -0.03           | -0.53           | -0.74            | -0.30            | 95  | LYS NZ  | 1.68           | -0.14           | 0.44           | -0.32          | 0.54            | 0.36            | -0.61            | 0.08             |
| 13 | ARG NE  | 1.53           | -0.81           | -0.30          | -0.49          | 0.03            | -0.20           | -0.81            | -0.01            | 96  | MET N   | 1.84           | 0.36            | -2.33          | -1.60          | 0.97            | 0.97            | -0.79            | 0.83             |
| 14 | ARG CZ  | 1.77           | -0.67           | -0.39          | -0.04          | -0.60           | -0.93           | -0.30            | -0.11            | 97  | MET CA  | 1.05           | -0.07           | 1.27           | -0.60          | -0.43           | -0.39           | -0.33            | -0.26            |
| 15 | ARG NH1 | 0.48           | -0.64           | -0.45          | -0.58          | -0.16           | -0.36           | -0.80            | -0.23            | 98  | MET C   | -2.45          | 1.77            | 1.32           | 0.76           | 0.10            | -0.11           | 0.74             | -0.16            |
| 16 | ARG NH2 | 0.74           | -0.57           | -0.28          | -0.29          | -0.16           | -0.35           | -0.63            | -0.05            | 99  | MET O   | -1.53          | -0.99           | 0.40           | 0.81           | -0.65           | -0.13           | 0.62             | -0.11            |
| 17 | ASN N   | 1.58           | 0.53            | -2.39          | -1.88          | 0.58            | -0.09           | -1.14            | 0.17             | 100 | MET CB  | 0.84           | -0.69           | 0.57           | -0.67          | 0.07            | -0.10           | -0.13            | 0.10             |
| 18 | ASN CA  | 0.53           | -0.31           | 0.65           | -0.96          | -0.68           | -0.81           | -0.78            | -0.66            | 101 | MET CG  | 0.32           | -0.62           | -0.32          | -0.49          | -0.27           | -0.73           | -0.24            | -0.10            |
| 19 | ASN C   | -2.36          | 0.66            | 1.49           | 0.33           | 0.13            | -0.61           | -0.15            | -0.30            | 102 | MET SD  | 0.35           | -0.62           | -0.69          | 0.53           | -0.44           | -0.87           | 0.36             | -0.09            |
| 20 | ASN O   | -1.89          | -0.98           | 0.33           | 0.53           | -0.74           | -0.72           | 0.09             | -0.44            | 103 | MET CE  | 0.71           | -0.64           | -0.73          | -0.01          | -0.45           | -0.75           | -0.18            | 0.00             |
| 21 | ASN CB  | 0.60           | -0.67           | 0.14           | -0.74          | 0.07            | -0.67           | -0.76            | -0.48            | 104 | PHE N   | 1.61           | 0.25            | -2.43          | -1.81          | 0.66            | 0.39            | -0.88            | 0.41             |
| 22 | ASN CG  | -0.06          | -0.81           | -0.61          | -0.71          | -0.68           | -1.30           | -0.29            | -0.50            | 105 | PHE CA  | 0.38           | -0.25           | 0.02           | -1.17          | -0.48           | -0.06           | -0.32            | -0.21            |
| 23 | ASN OD1 | -1.17          | -0.80           | -0.18          | 0.06           | -0.77           | -0.29           | -0.09            | -0.72            | 106 | PHE C   | -2.65          | 0.12            | 1.43           | 0.58           | 0.09            | -0.03           | -0.31            | -0.37            |
| 24 | ASN ND2 | 0.19           | -0.65           | -0.31          | -0.47          | -0.47           | -0.51           | -0.73            | -0.42            | 107 | PHE O   | -1.85          | -1.00           | 0.23           | 0.72           | -0.72           | -0.33           | 0.30             | -0.54            |
| 25 | ASP N   | 1.28           | 0.57            | -2.54          | -2.02          | 0.17            | -0.44           | -1.28            | -0.18            | 108 | PHE CB  | 0.64           | -0.58           | -0.01          | -0.90          | 0.00            | -0.42           | -0.32            | -0.06            |
| 26 | ASP CA  | 0.39           | -0.27           | 1.14           | -0.72          | -1.13           | -0.68           | -0.52            | -0.93            | 109 | PHE CG  | 1.21           | -0.28           | 0.39           | 0.55           | -0.76           | -0.63           | 0.43             | 0.08             |
| 27 | ASP C   | -2.76          | 0.09            | 2.15           | 0.35           | 0.16            | -0.65           | 0.14             | -0.41            | 110 | PHE CD1 | 0.64           | -0.51           | -0.95          | -0.44          | -0.42           | -0.68           | -0.05            | 0.02             |
| 28 | ASP O   | -2.06          | -0.74           | 0.00           | 0.64           | -1.02           | -0.77           | 0.29             | -0.59            | 111 | PHE CD2 | 0.19           | -0.77           | -0.80          | -0.22          | -0.55           | -0.69           | 0.02             | -0.06            |
| 29 | ASP CB  | 0.03           | -0.49           | 0.40           | -0.71          | -0.39           | -0.64           | -0.74            | -0.70            | 112 | PHE CE1 | 0.49           | -0.55           | -0.74          | 0.06           | -0.50           | -0.60           | 0.09             | -0.07            |
| 30 | ASP CG  | -0.57          | -0.38           | -0.05          | -0.76          | -1.30           | -0.76           | -0.35            | -0.73            | 113 | PHE CE2 | 0.53           | -0.61           | -0.80          | 0.24           | -0.65           | -0.79           | 0.23             | 0.05             |
| 31 | ASP OD1 | -1.52          | -0.23           | 0.28           | 0.55           | -1.04           | 0.08            | 0.06             | -0.79            | 114 | PHE CZ  | 0.68           | -0.56           | -0.34          | 0.24           | -0.45           | -0.69           | 0.17             | -0.11            |
| 32 | ASP OD2 | -0.79          | -0.30           | 0.48           | 0.73           | -0.81           | 0.35            | 0.18             | -0.76            | 115 | PRO N   | 2.25           | 0.26            | -1.63          | -1.53          | 0.40            | -0.23           | -0.36            | -0.40            |
| 33 | CYS N   | 1.13           | 0.69            | -2.37          | -1.81          | 0.84            | 0.77            | -0.84            | 0.38             | 116 | PRO CA  | 0.96           | -0.70           | 0.29           | -0.83          | -0.33           | -1.19           | -0.93            | -0.58            |
| 34 | CYS CA  | 0.80           | 0.31            | -0.03          | -0.77          | -0.07           | -0.73           | -0.48            | 0.27             | 117 | PRO C   | -2.66          | 0.25            | 0.89           | 0.57           | 0.26            | 0.03            | 0.05             | -0.50            |
| 35 | CYS C   | -2.33          | 0.34            | 0.66           | -0.11          | 0.34            | 0.38            | 0.12             | -0.14            | 118 | PRO O   | -1.56          | -0.33           | 0.45           | 0.65           | -0.73           | -0.25           | 0.27             | -0.51            |
| 36 | CYS O   | -1.62          | -0.98           | 0.30           | 0.40           | -0.57           | 0.21            | 0.17             | -0.37            | 119 | PRO CB  | 0.31           | -0.66           | -0.34          | -0.26          | -0.15           | -0.63           | -0.49            | -0.19            |
| 37 | CYS CB  | 0.63           | -0.43           | -0.38          | -0.78          | -0.07           | -0.42           | -0.24            | 0.05             | 120 | PRO CG  | 0.63           | -0.54           | -0.45          | -0.28          | -0.02           | -0.34           | -0.23            | -0.11            |
| 38 | CYS SG  | -0.24          | -0.38           | -0.56          | -0.03          | -0.17           | -0.06           | 0.07             | 0.27             | 121 | PRO CD  | 1.05           | -0.26           | -1.50          | -1.28          | -0.01           | -0.59           | -0.16            | -0.09            |
| 39 | GLN N   | 1.31           | 0.87            | -2.51          | -2.12          | 0.63            | 0.43            | -0.99            | 0.34             | 122 | SER N   | 1.82           | 0.18            | -2.28          | -1.74          | 0.24            | 0.02            | -1.01            | -0.04            |
| 40 | GLN CA  | 0.69           | -0.54           | 0.23           | -0.61          | -0.92           | -0.35           | -0.46            | -0.69            | 123 | SER CA  | 0.79           | -0.64           | 0.36           | -0.55          | -0.59           | -0.30           | -0.70            | -0.62            |
| 41 | GLN C   | -2.31          | 1.82            | 3.10           | 0.64           | 0.15            | 0.42            | 0.12             | -0.33            | 124 | SER C   | -2.40          | 0.26            | 1.32           | 0.44           | -0.24           | 0.06            | 0.06             | -0.30            |
| 42 | GLN O   | -2.04          | -0.58           | 0.98           | 0.73           | -0.96           | -1.20           | 0.27             | -0.56            | 125 | SER O   | -1.90          | -0.71           | -0.04          | 0.59           | -0.95           | -0.30           | 0.27             | -0.57            |
| 43 | GLN CB  | 0.68           | -0.53           | 1.01           | -0.93          | -0.38           | -0.55           | -0.65            | -0.33            | 126 | SER CB  | 0.46           | -0.65           | -0.20          | -0.72          | -0.27           | -0.41           | -0.48            | -0.31            |
| 44 | GLN CG  | 0.56           | -0.44           | -0.23          | -1.09          | -0.22           | -0.63           | -0.69            | -0.61            | 127 | SER OG  | -0.86          | -0.71           | -0.04          | -0.47          | -0.80           | -0.42           | -0.53            | -0.60            |
| 45 | GLN CD  | 0.51           | -0.69           | -0.63          | -0.11          | -0.79           | -1.00           | -0.13            | -0.66            | 128 | THR N   | 1.75           | 0.46            | -2.21          | -1.79          | 0.43            | 0.14            | -1.15            | -0.03            |
| 46 | GLN OE1 | -0.54          | -0.40           | 0.04           | 0.32           | -0.64           | -0.26           | -0.09            | -0.74            | 129 | THR CA  | 0.56           | -0.68           | 0.28           | -0.75          | -0.70           | -0.53           | -0.50            | -0.45            |
| 47 | GLN NE2 | 0.22           | -0.71           | -0.44          | -0.54          | -0.44           | -0.45           | -0.86            | -0.48            | 130 | THR C   | -2.51          | 0.58            | 0.84           | 0.62           | -0.06           | -0.08           | 0.10             | -0.22            |
| 48 | GLU N   | 1.57           | 0.58            | -2.44          | -1.87          | 0.81            | -0.18           | -1.13            | 0.04             | 131 | THR O   | -1.99          | -0.98           | 0.08           | 0.57           | -0.91           | -0.91           | 0.19             | -0.46            |
| 49 | GLU CA  | 1.09           | -0.22           | 1.45           | -0.22          | -0.86           | -0.18           | -0.29            | -0.55            | 132 | THR CB  | 0.55           | -1.00           | -0.10          | -0.59          | -0.48           | -0.45           | -0.78            | -0.50            |
| 50 | GLU C   | -2.53          | 1.33            | 1.34           | 0.91           | 0.17            | 1.00            | 0.30             | -0.38            | 133 | THR OG1 | -0.71          | -0.71           | 0.07           | -0.46          | -0.78           | -0.62           | -0.61            | -0.72            |
| 51 | GLU O   | -2.11          | -0.53           | 0.45           | 0.90           | -0.99           | -1.09           | 0.10             | -0.52            | 134 | THR CG2 | 0.50           | -0.76           | -0.48          | -0.33          | -0.50           | -0.73           | -0.37            | -0.49            |
| 52 | GLU CB  | 0.60           | -0.58           | 0.40           | -0.78          | -0.25           | -0.55           | -0.60            | -0.46            | 135 | TRP N   | 2.29           | 1.26            | -2.56          | -1.95          | 0.72            | -0.20           | -0.69            | 0.29             |
| 53 | GLU CG  | 0.79           | 0.04            | 0.03           | -0.54          | -0.18           | -0.64           | -0.28            | -0.53            | 136 | TRP CA  | 0.08           | -0.55           | 0.67           | -0.87          | -0.73           | -0.08           | -0.70            | -0.42            |
| 54 | GLU CD  | 0.64           | -0.46           | 0.11           | 0.31           | -0.65           | 0.22            | 0.12             | -0.59            | 137 | TRP C   | -2.66          | 0.49            | 3.10           | 1.44           | -0.19           | -0.69           | 0.61             | -0.33            |
| 55 | GLU OE1 | -0.16          | 0.01            | 0.85           | 1.03           | -0.21           | 0.63            | 0.22             | -0.43            | 138 | TRP O   | -2.09          | -0.83           | 0.63           | 0.48           | -0.19           | -0.31           | 0.20             | -0.63            |
| 56 | GLU OE2 | -0.13          | -0.07           | 0.74           | 0.95           | -0.33           | 0.46            | 0.11             | -0.42            | 139 | TRP CB  | 1.36           | -0.22           | 0.10           | -0.89          | -0.33           | -0.29           | -0.30            | 0.00             |
| 57 | GLY N   | 1.27           | -0.04           | -2.00          | -1.63          | 0.41            | 0.05            | -0.91            | 0.15             | 140 | TRP CG  | 1.06           | -0.46           | 0.07           | 0.14           | -0.61           | -1.02           | 0.03             | -0.19            |
| 58 | GLY CA  | 0.47           | -0.40           | -0.16          | -0.80          | -0.19           | -0.55           | -0.58            | -0.42            | 141 | TRP CD1 | 0.25           | -0.89           | -1.10          | -0.93          | -0.41           | -0.78           | -0.33            | -0.51            |
| 59 | GLY C   | -1.89          | -0.50           | 0.23           | 0.11           | -0.14           | -0.61           | -0.42            | -0.55            | 142 | TRP CD2 | 0.79           | -0.33           | -0.22          | 0.74           | -1.17           | -0.93           | 0.22             | -0.53            |
| 60 | GLY O   | -1.58          | -0.96           | -0.01          | 0.62           | -0.76           | -0.55           | 0.02             | -0.59            | 143 | TRP NE1 | 0.54           | -0.60           | -0.12          | -0.65          | -0.48           | -0.83           | -0.97            | -0.46            |
| 61 | HIS N   | 1.50           | 0.57            | -2.36          | -1.83          | 0.83            | 0.24            | -1.12            | 0.40             | 144 | TRP CE2 | 0.70           | -0.52           | -0.36          | 1.13           | -1.19           | -1.29           | 0.12             | -0.75            |
| 62 | HIS CA  | 0.86           | -0.37           | 1.44           | -0.62          | -0.81           | -0.40           | -0.78            | -0.51            | 145 | TRP CE3 | 0.11           | -0.75           | -0.69          | 0.26           | -0.86           | -0.62           | 0.03             | -0.08            |
| 63 | HIS C   | -2.40          | 1.14            | 3.14           | 1.08           | -0.04           | 0.72            | 0.06             | -0.19            | 146 | TRP CZ2 | 0.63           | -0.87           | -0.71          | -0.05          | -0.84           | -1.19           | -0.39            | -0.43            |
| 64 | HIS O   | -1.87          | -0.60           | 0.18           | 0.67           | -0.95           | -0.57           | 0.41             | -0.58            | 147 | TRP CZ3 | -0.11          | -0.72           | -0.30          | 0.30           | -0.71           | -0.69           | 0.18             | -0.19            |
| 65 | HIS CB  | 0.61           | -0.40           | 0.22           | -0.70          | -0.29           | -0.82           | -0.72            | -0.44            | 148 | TRP CH2 | 0.48           | -0.70           | -0.83          | -0.05          | -0.76           | -0.82           | -0.07            | -0.22            |
| 66 | HIS CG  | 2.17           | 0.33            | 0.51           | -0.02          | -0.99           | -0.97           | -0.04            | -0.30            | 149 | TYR N   | 1.62           | 1.05            | -2.29          | -1.74          | 0.78            | 0.21            | -0.88            | 0.25             |
| 67 | HIS ND1 |                |                 |                |                |                 |                 |                  |                  |     |         |                |                 |                |                |                 |                 |                  |                  |

Table 3. (continued)

|    |         | 25<br>ASP<br>N | 26<br>ASP<br>CA | 27<br>ASP<br>C | 28<br>ASP<br>O | 29<br>ASP<br>CB | 30<br>ASP<br>CG | 31<br>ASP<br>OD1 | 32<br>ASP<br>OD2 |     |         | 25<br>ASP<br>N | 26<br>ASP<br>CA | 27<br>ASP<br>C | 28<br>ASP<br>O | 29<br>ASP<br>CB | 30<br>ASP<br>CG | 31<br>ASP<br>OD1 | 32<br>ASP<br>OD2 |
|----|---------|----------------|-----------------|----------------|----------------|-----------------|-----------------|------------------|------------------|-----|---------|----------------|-----------------|----------------|----------------|-----------------|-----------------|------------------|------------------|
| 0  | SAS SAS | 1.60           | 0.93            | 1.88           | 0.92           | 0.51            | 0.75            | 0.31             | 0.16             | 83  | LEU CB  | 0.66           | -0.79           | 0.11           | -0.82          | -0.11           | 0.03            | 0.33             | 0.54             |
| 1  | ALA N   | 1.68           | 0.57            | -2.45          | -1.93          | 0.61            | -0.30           | -0.80            | 0.01             | 84  | LEU CG  | 0.65           | -0.29           | -0.17          | -0.85          | -0.17           | -0.21           | 0.64             | 0.70             |
| 2  | ALA CA  | 1.08           | 0.12            | 0.80           | -0.33          | -0.60           | -0.13           | 0.28             | -0.24            | 85  | LEU CD1 | 0.79           | -0.57           | -0.49          | 0.37           | -0.25           | 0.06            | 0.60             | 0.74             |
| 3  | ALA C   | -2.48          | 1.44            | 3.33           | 1.01           | 0.72            | 0.58            | 1.04             | 0.89             | 86  | LEU CD2 | 1.01           | -0.29           | -0.29          | 0.46           | -0.36           | -0.09           | 0.80             | 0.57             |
| 4  | ALA O   | -1.71          | -0.29           | 1.14           | 1.19           | -0.60           | -0.19           | 0.99             | 1.10             | 87  | LYS N   | 0.92           | 0.41            | -2.78          | -2.22          | 0.27            | -0.58           | -1.19            | -0.55            |
| 5  | ALA CB  | 0.60           | -0.69           | -0.22          | -0.75          | -0.13           | -0.41           | -0.04            | 0.08             | 88  | LYS CA  | 0.65           | -0.80           | 0.11           | -0.82          | -0.64           | -0.33           | -0.45            | -0.46            |
| 6  | ARG N   | 1.57           | 0.68            | -2.77          | -2.23          | 0.33            | -0.57           | -1.28            | -0.79            | 89  | LYS C   | -2.25          | 0.99            | 0.49           | 0.45           | 0.34            | 0.54            | 0.15             | 0.37             |
| 7  | ARG CA  | 1.27           | -0.29           | 1.03           | -0.54          | -0.67           | -0.04           | -0.28            | -0.45            | 90  | LYS O   | -2.27          | -0.50           | 0.41           | 0.77           | -1.06           | -1.41           | 0.22             | 0.36             |
| 8  | ARG C   | -2.41          | 0.64            | 2.55           | 1.07           | 0.47            | 1.50            | 0.50             | 0.88             | 91  | LYS CB  | 0.25           | -1.42           | 0.15           | -1.29          | -0.65           | -1.10           | -0.71            | -0.49            |
| 9  | ARG O   | -2.00          | -0.55           | 0.71           | 0.96           | -0.86           | -1.00           | 0.59             | 0.63             | 92  | LYS CG  | 0.55           | -0.99           | -0.40          | -1.11          | -0.71           | -1.29           | -0.74            | -0.75            |
| 10 | ARG CB  | 0.11           | -1.34           | 0.10           | -1.34          | -0.47           | -1.21           | -0.97            | -0.78            | 93  | LYS CD  | 0.71           | -1.34           | -0.37          | -0.37          | -0.69           | -1.40           | -1.05            | -0.99            |
| 11 | ARG CG  | 0.68           | -0.76           | -0.41          | -1.04          | -0.56           | -1.02           | -0.84            | -0.63            | 94  | LYS CE  | 0.85           | -0.77           | -0.06          | -0.40          | -0.39           | -0.99           | -1.03            | -1.02            |
| 12 | ARG CD  | 1.11           | -1.01           | -0.16          | -0.45          | -0.37           | -0.96           | -0.99            | -0.88            | 95  | LYS NZ  | 0.99           | -0.32           | 0.38           | -0.33          | -0.16           | -0.75           | -1.42            | -1.37            |
| 13 | ARG NE  | 0.62           | -0.94           | -0.33          | -0.54          | -0.44           | -1.46           | -1.97            | -1.79            | 96  | MET N   | 1.27           | 0.99            | -2.35          | -1.52          | 1.01            | 0.10            | -0.52            | -0.06            |
| 14 | ARG CZ  | 0.60           | -1.27           | -0.47          | -0.15          | -0.74           | -0.43           | 0.00             | -0.16            | 97  | MET CA  | 0.35           | 0.22            | 0.94           | -0.57          | -0.61           | -0.11           | 0.43             | -0.59            |
| 15 | ARG NH1 | 0.07           | -1.29           | -0.60          | -0.56          | -0.63           | -1.07           | -1.49            | -1.31            | 98  | MET C   | -2.67          | 0.14            | 0.30           | 1.01           | 0.17            | 0.63            | 0.65             | 0.80             |
| 16 | ARG NH2 | 0.03           | -1.12           | -0.35          | -0.58          | -0.60           | -1.30           | -1.65            | -1.61            | 99  | MET O   | -1.54          | -0.63           | 0.50           | 1.12           | -0.54           | -0.43           | 0.81             | 1.05             |
| 17 | ASN N   | 1.28           | 0.38            | -2.79          | -2.05          | 0.00            | -0.60           | -1.48            | -0.76            | 100 | MET CB  | 0.79           | -0.71           | 0.28           | -0.69          | -0.10           | -0.23           | -0.02            | 0.19             |
| 18 | ASN CA  | 0.56           | -0.28           | 0.11           | -0.72          | -0.50           | -0.37           | -0.22            | -0.32            | 101 | MET CG  | 0.62           | -0.46           | -0.31          | -0.56          | -0.28           | -0.15           | 0.54             | 0.46             |
| 19 | ASN C   | -2.51          | 1.15            | 2.15           | 0.00           | 0.38            | -0.04           | 0.31             | 0.50             | 102 | MET SD  | 0.29           | -0.19           | -0.42          | 0.45           | -0.29           | 0.42            | 1.26             | 1.23             |
| 20 | ASN O   | -2.03          | -0.73           | 0.35           | 0.64           | -0.72           | -0.77           | 0.57             | 0.76             | 103 | MET CE  | 0.52           | -0.31           | -0.61          | 0.09           | -0.33           | -0.12           | 0.62             | 0.50             |
| 21 | ASN CB  | 0.18           | -1.13           | 0.18           | -1.02          | -0.39           | -1.28           | -1.04            | -0.85            | 104 | PHE N   | 1.97           | 0.90            | -2.45          | -1.85          | 0.60            | 0.10            | -0.39            | -0.12            |
| 22 | ASN CG  | -0.41          | -0.67           | -0.66          | -0.75          | -0.64           | -0.76           | 0.08             | 0.34             | 105 | PHE CA  | 0.68           | 0.62            | 0.69           | -0.50          | -0.21           | 0.42            | 0.25             | -0.43            |
| 23 | ASN OD1 | -1.31          | -0.52           | 0.13           | 0.27           | -0.72           | -0.35           | 0.06             | 0.19             | 106 | PHE C   | -2.68          | 0.66            | 1.85           | 0.16           | 0.76            | 0.86            | 0.41             | 0.74             |
| 24 | ASN ND2 | -0.16          | -0.91           | -0.42          | -0.61          | -0.68           | -0.73           | -0.81            | -0.78            | 107 | PHE O   | -1.61          | -0.75           | 0.56           | 0.69           | -0.43           | 0.50            | 0.94             | 1.30             |
| 25 | ASP N   | 1.88           | 1.11            | -2.50          | -1.79          | 0.22            | -0.24           | -0.86            | -0.28            | 108 | PHE CB  | 0.44           | -0.83           | 0.12           | -0.82          | -0.14           | -0.21           | 0.09             | 0.12             |
| 26 | ASP CA  | 1.11           | 0.41            | 1.54           | -0.15          | -0.55           | 0.11            | 0.12             | 0.13             | 109 | PHE CG  | 1.51           | 0.66            | 0.52           | 0.34           | -0.16           | 0.77            | 1.95             | 1.54             |
| 27 | ASP C   | -2.47          | 1.58            | 3.28           | 0.85           | 0.73            | 1.40            | 0.96             | 0.87             | 110 | PHE CD1 | 0.67           | -0.27           | -0.76          | -0.24          | -0.30           | -0.33           | 0.64             | 0.56             |
| 28 | ASP O   | -1.80          | -0.17           | 0.86           | 0.91           | -0.65           | -0.43           | 0.88             | 0.88             | 111 | PHE CD2 | 0.52           | -0.37           | -0.62          | -0.06          | -0.30           | -0.04           | 0.72             | 0.63             |
| 29 | ASP CB  | 0.25           | -0.54           | 0.74           | -0.65          | -0.27           | -0.30           | -0.26            | -0.13            | 112 | PHE CE1 | 0.68           | -0.37           | -0.51          | 0.29           | -0.47           | -0.10           | 0.75             | 0.72             |
| 30 | ASP CG  | -0.21          | 0.09            | 1.40           | -0.42          | -0.30           | 0.13            | -0.04            | 0.41             | 113 | PHE CE2 | 0.51           | -0.28           | -0.30          | 0.45           | -0.39           | 0.00            | 0.80             | 0.78             |
| 31 | ASP OD1 | -0.89          | 0.10            | 0.96           | 0.86           | -0.23           | -0.04           | 0.18             | 0.30             | 114 | PHE CZ  | 0.87           | -0.28           | -0.41          | 0.45           | -0.18           | -0.11           | 0.74             | 0.86             |
| 32 | ASP OD2 | -0.29          | 0.19            | 0.88           | 0.85           | -0.06           | 0.42            | 0.29             | 0.41             | 115 | PRO N   | 1.84           | 0.19            | -1.63          | -1.56          | 0.05            | -0.23           | -0.17            | 0.32             |
| 33 | CYS N   | 1.64           | 1.02            | -2.26          | -1.65          | 0.69            | -0.58           | -0.36            | -0.20            | 116 | PRO CA  | 1.37           | -0.41           | 0.19           | -0.64          | -0.25           | -0.78           | -0.29            | -0.48            |
| 34 | CYS CA  | 0.69           | -0.58           | -0.01          | -0.83          | -0.63           | -0.20           | 0.04             | -0.10            | 117 | PRO C   | -2.83          | 1.15            | 2.69           | 0.78           | 0.51            | 0.75            | 0.73             | 0.96             |
| 35 | CYS C   | -2.37          | -0.18           | 3.27           | 0.35           | 0.10            | 0.91            | 0.73             | 1.16             | 118 | PRO O   | -1.48          | 0.27            | 1.57           | 1.06           | -0.23           | 0.13            | 0.77             | 0.88             |
| 36 | CYS O   | -1.75          | -0.60           | 0.43           | 0.59           | -0.57           | -0.22           | 0.92             | 0.98             | 119 | PRO CB  | 0.19           | -0.28           | -0.09          | -0.12          | -0.44           | -0.41           | -0.34            | 0.05             |
| 37 | CYS CB  | 1.02           | -0.41           | -0.39          | -0.67          | -0.07           | -0.09           | 0.11             | 0.18             | 120 | PRO CG  | 0.95           | -0.33           | -0.29          | -0.26          | -0.27           | -0.38           | 0.30             | 0.09             |
| 38 | CYS SG  | -0.06          | -0.28           | -0.02          | 0.30           | -0.30           | -0.09           | 0.85             | 0.80             | 121 | PRO CD  | 1.24           | -0.40           | -1.41          | -1.12          | 0.21            | -0.43           | 0.14             | 0.30             |
| 39 | GLN N   | 1.83           | 0.83            | -2.61          | -2.03          | 0.79            | -0.37           | -0.76            | -0.46            | 122 | SER N   | 1.82           | 0.62            | -2.63          | -1.86          | -0.05           | -0.71           | -1.51            | -0.91            |
| 40 | GLN CA  | 1.20           | -0.23           | 1.07           | -0.28          | -0.67           | -0.59           | 0.17             | -0.53            | 123 | SER CA  | 0.62           | -0.60           | 0.44           | -0.60          | -0.44           | -0.64           | -0.43            | -0.50            |
| 41 | GLN C   | -2.36          | 1.05            | 1.78           | 0.40           | 0.58            | 0.30            | 0.88             | 0.28             | 124 | SER C   | -2.64          | 0.52            | 0.95           | 0.71           | 0.29            | 0.57            | 0.42             | 0.46             |
| 42 | GLN O   | -2.05          | -0.04           | 1.03           | 1.02           | -0.88           | -1.34           | 0.73             | 0.53             | 125 | SER O   | -1.80          | -0.28           | 0.45           | 0.77           | -0.65           | -0.55           | 0.64             | 0.90             |
| 43 | GLN CB  | 0.46           | -1.05           | 0.94           | -1.08          | -0.05           | -0.55           | -0.27            | -0.16            | 126 | SER CB  | 0.20           | -0.66           | -0.01          | -0.69          | -0.30           | -0.80           | -0.73            | -0.64            |
| 44 | GLN CG  | 0.83           | -0.36           | -0.33          | -0.90          | -0.08           | -0.71           | -0.44            | -0.76            | 127 | SER OG  | -1.03          | -0.64           | 0.06           | -0.41          | -0.73           | -0.92           | -1.09            | -0.94            |
| 45 | GLN CD  | 0.94           | -0.77           | -0.78          | 0.43           | -0.38           | 0.28            | 0.54             | 0.60             | 128 | THR N   | 1.28           | 0.97            | -2.42          | -1.94          | -0.02           | -0.48           | -1.41            | -1.04            |
| 46 | GLN OE1 | -0.30          | -0.38           | 0.10           | 0.38           | -0.25           | 0.13            | -0.05            | 0.08             | 129 | THR CA  | 0.72           | -0.29           | 1.26           | -0.47          | -0.34           | -0.07           | 0.01             | -0.21            |
| 47 | GLN NE2 | 0.37           | -0.62           | -0.15          | -0.28          | -0.29           | -0.41           | -0.72            | -0.50            | 130 | THR C   | -2.63          | 0.28            | 2.13           | 0.90           | 0.17            | 0.29            | 0.54             | 0.46             |
| 48 | GLU N   | 1.34           | 1.03            | -2.60          | -1.94          | 0.69            | -0.08           | -0.86            | -0.14            | 131 | THR O   | -1.89          | -0.41           | 0.52           | 0.63           | -0.64           | -0.48           | 0.46             | 0.89             |
| 49 | GLU CA  | 1.19           | 0.05            | 1.11           | 0.00           | -0.85           | 0.21            | 0.39             | -0.17            | 132 | THR CB  | -0.43          | -0.97           | 0.09           | -0.94          | -0.56           | -1.09           | -0.88            | -0.70            |
| 50 | GLU C   | -2.44          | 1.76            | 2.23           | 1.09           | 0.91            | 1.28            | 1.07             | 0.75             | 133 | THR OG1 | -1.09          | -0.53           | 0.28           | -0.56          | -0.77           | -0.97           | -0.92            | -0.83            |
| 51 | GLU O   | -1.78          | 0.17            | 1.01           | 1.16           | -0.74           | -0.53           | 0.93             | 0.85             | 134 | THR CG2 | 0.24           | -0.28           | -0.44          | -0.22          | -0.40           | -0.56           | -0.02            | -0.24            |
| 52 | GLU CB  | 0.35           | -0.73           | 1.17           | -0.97          | -0.10           | -0.44           | -0.30            | 0.01             | 135 | TRP N   | 2.14           | 0.64            | -2.39          | -1.93          | 0.98            | -0.29           | -0.66            | -0.06            |
| 53 | GLU CG  | 0.78           | -0.19           | 0.67           | -0.34          | 0.19            | 0.00            | 0.30             | 0.20             | 136 | TRP CA  | 1.16           | -0.09           | 1.12           | -0.34          | -0.33           | 0.82            | 0.33             | 0.02             |
| 54 | GLU CD  | 0.82           | -0.51           | 0.11           | 0.71           | -0.12           | 0.25            | 0.57             | 0.43             | 137 | TRP C   | -2.70          | 1.52            | 1.02           | 0.53           | 0.48            | 0.74            | 0.63             | 0.89             |
| 55 | GLU OE1 | 0.21           | -0.08           | 0.56           | 1.16           | 0.31            | 0.32            | 0.47             | 0.42             | 138 | TRP O   | -1.58          | -0.10           | 1.08           | 0.77           | -0.35           | 0.17            | 1.11             | 1.19             |
| 56 | GLU OE2 | 0.22           | -0.16           | 1.01           | 1.31           | 0.24            | 0.58            | 0.57             | 0.55             | 139 | TRP CB  | 0.47           | -0.57           | 0.25           | -0.77          | 0.08            | 0.01            | -0.01            | 0.24             |
| 57 | GLY N   | 1.28           | -0.04           | -2.20          | -1.67          | 0.11            | -0.45           | -1.16            | -0.63            | 140 | TRP CG  | 0.92           | -0.62           | -0.35          | 0.85           | 0.32            | 2.48            | 1.40             | 1.40             |
| 58 | GLY CA  | 0.44           | -0.43           | -0.13          | -0.69          | -0.12           | -0.62           | -0.46            | -0.34            | 141 | TRP CD1 | 0.19           | -1.10           | -1.22          | -0.89          | -0.71           | -0.44           | 0.09             | -0.14            |
| 59 | GLY C   | -2.01          | -0.34           | 0.73           | 0.45           | -0.06           | -0.36           | 0.00             | 0.13             | 142 | TRP CD2 | 1.00           | -0.68           | 0.30           | 0.93           | 0.05            | 2.06            | 2.10             | 1.86             |
| 60 | GLY O   | -1.48          | -0.63           | 0.49           | 0.85           | -0.31           | -0.24           | 0.48             | 0.63             | 143 | TRP NE1 | 0.44           | -1.12           | -0.21          | -0.45          | -0.72           | -0.72           | -1.05            | -0.82            |
| 61 | HIS N   | 1.43           | 0.05            | -2.39          | -1.77          | 0.37            | -0.44           | -1.23            | -0.83            | 144 | TRP CE2 | 0.72           | -0.39           | -0.66          | 0.84           | -0.49           | 0.19            | 1.98             | 1.69             |
| 62 | HIS CA  | 1.04           | -0.53           | 1.49           | -0.43          | -0.67           | -1.05           | -0.85            | -0.84            | 145 | TRP CE3 | 0.77           | -0.35           | -0.11          | 0.77           | 0.04            | 0.55            | 1.04             | 1.20             |
| 63 | HIS C   | -2.54          | 0.93            | 3.36           | 0.50           | 0.51            | 0.32            | 0.11             | 0.63             | 146 | TRP CZ2 | 0.43           | -0.86           | -0.62          | -0.02          | -0.52           | -0.47           | -0.07            | 0.04             |
| 64 | HIS O   | -1.93          | -0.65           | 0.71           | 0.66           | -0.63           | -0.56           | 0.69             | 0.80             | 147 | TRP CZ3 | 0.02           | -0.03           | -0.49          | 0.19           | -0.20           | 0.43            | 1.16             | 1.08             |
| 65 | HIS CB  | 0.17           | -0.77           | 0.65           | -0.74          | -0.24           | -0.93           | -0.81            | -0.49            | 148 | TRP CH2 | 0.36           | -0.79           | -0.66          | 0.20           | -0.38           | -0.08           | 0.79             | 0.64             |
| 66 | HIS CG  | 1.04           | -0.70           | 1.03           | -0.04          | -0.44           | -0.48           | 0.22             | 0.79             | 149 | TYR N   | 1.51           | 0.88            | -2.57          | -1.86          | 0.66            | 0.01            | -0.44            | -0.14            |
| 67 | HIS ND1 | -0.83          |                 |                |                |                 |                 |                  |                  |     |         |                |                 |                |                |                 |                 |                  |                  |

Table 3. (continued)

|        |     | 33<br>CYS<br>N | 34<br>CYS<br>CA | 35<br>CYS<br>C | 36<br>CYS<br>O | 37<br>CYS<br>CB | 38<br>CYS<br>SG |         |     | 33<br>CYS<br>N | 34<br>CYS<br>CA | 35<br>CYS<br>C | 36<br>CYS<br>O | 37<br>CYS<br>CB | 38<br>CYS<br>SG |
|--------|-----|----------------|-----------------|----------------|----------------|-----------------|-----------------|---------|-----|----------------|-----------------|----------------|----------------|-----------------|-----------------|
| 0 SAS  | SAS | 2.27           | 2.17            | 2.25           | 1.33           | 1.94            | 2.02            | 83 LEU  | CB  | 0.76           | -0.93           | 0.02           | -0.99          | -0.80           | -0.85           |
| 1 ALA  | N   | 2.09           | 0.83            | -2.23          | -1.93          | 0.22            | -0.28           | 84 LEU  | CG  | 0.61           | -0.40           | -0.47          | -1.16          | -0.51           | -0.99           |
| 2 ALA  | CA  | 1.37           | -0.33           | 0.67           | -0.67          | -0.59           | -0.65           | 85 LEU  | CD1 | 0.68           | -0.59           | -0.77          | -0.11          | -0.83           | -0.89           |
| 3 ALA  | C   | -2.50          | 0.65            | 1.70           | 0.76           | -0.26           | -0.79           | 86 LEU  | CD2 | 0.60           | -0.74           | -0.48          | 0.05           | -0.84           | -0.87           |
| 4 ALA  | O   | -1.92          | -0.50           | 0.45           | 0.28           | -1.02           | -0.13           | 87 LYS  | N   | 1.39           | 1.07            | -2.20          | -1.54          | 1.02            | 0.44            |
| 5 ALA  | CB  | 0.22           | -0.80           | -0.43          | -0.70          | -0.65           | -0.67           | 88 LYS  | CA  | 0.94           | -0.13           | 1.79           | -0.70          | -0.24           | -0.01           |
| 6 ARG  | N   | 2.59           | 0.54            | -2.30          | -1.60          | 0.66            | -0.02           | 89 LYS  | C   | -2.08          | 0.58            | 3.77           | 1.07           | -0.14           | -0.61           |
| 7 ARG  | CA  | 0.43           | -0.25           | 0.66           | -1.08          | -0.71           | -0.86           | 90 LYS  | O   | -1.51          | -0.50           | 0.80           | 0.31           | -0.53           | 0.19            |
| 8 ARG  | C   | -2.22          | 1.07            | 1.40           | 0.52           | -0.73           | -0.82           | 91 LYS  | CB  | 1.22           | -0.12           | 0.16           | -0.38          | 0.47            | -0.21           |
| 9 ARG  | O   | -1.68          | -1.09           | 0.18           | 0.30           | -0.69           | 0.03            | 92 LYS  | CG  | 1.09           | 0.10            | 0.05           | -0.17          | 0.32            | -0.18           |
| 10 ARG | CB  | 0.95           | -1.09           | 0.09           | -0.64          | -0.42           | -0.62           | 93 LYS  | CD  | 1.51           | 0.10            | -0.06          | 0.15           | 0.55            | 0.27            |
| 11 ARG | CG  | 1.27           | -0.05           | -0.47          | -0.57          | -0.55           | -0.47           | 94 LYS  | CE  | 1.44           | 0.48            | 0.36           | 0.01           | 0.68            | 0.22            |
| 12 ARG | CD  | 1.19           | -0.18           | -0.14          | -0.36          | -0.19           | -0.12           | 95 LYS  | NZ  | 1.62           | 0.74            | 1.05           | 0.15           | 1.34            | 0.99            |
| 13 ARG | NE  | 1.06           | -0.52           | 0.33           | -0.37          | -0.38           | -0.01           | 96 MET  | N   | 1.13           | 0.76            | -2.02          | -2.23          | 0.90            | 0.15            |
| 14 ARG | CZ  | 1.55           | 0.08            | -0.77          | -0.17          | -0.50           | -0.59           | 97 MET  | CA  | 1.63           | -0.80           | 0.09           | -1.31          | -0.81           | -0.85           |
| 15 ARG | NH1 | 0.76           | -0.12           | -0.09          | -0.49          | 0.31            | 0.30            | 98 MET  | C   | -2.38          | 0.71            | 4.00           | 0.43           | -0.07           | -0.95           |
| 16 ARG | NH2 | 1.14           | 0.25            | -0.32          | -0.40          | 0.25            | 0.31            | 99 MET  | O   | -2.35          | -0.40           | 0.99           | 0.28           | -0.95           | -0.67           |
| 17 ASN | N   | 1.13           | 0.80            | -2.36          | -1.62          | 0.62            | -0.28           | 100 MET | CB  | 0.63           | -0.65           | -0.27          | -1.13          | -0.77           | -0.82           |
| 18 ASN | CA  | 0.68           | 0.32            | 0.31           | -0.97          | -0.43           | -0.39           | 101 MET | CG  | -0.08          | -0.73           | -0.80          | -1.13          | -0.99           | -1.06           |
| 19 ASN | C   | -2.34          | -0.03           | 0.66           | 0.31           | -0.39           | -0.57           | 102 MET | SD  | 0.32           | -0.92           | -1.09          | 0.38           | -1.15           | -0.73           |
| 20 ASN | O   | -1.81          | -0.81           | -0.12          | 0.39           | -0.80           | -0.01           | 103 MET | CE  | 0.15           | -0.78           | -1.03          | -0.46          | -1.00           | -0.84           |
| 21 ASN | CB  | 0.86           | -0.05           | 0.33           | -0.59          | -0.06           | -0.17           | 104 PHE | N   | 1.11           | 0.68            | -1.94          | -2.20          | 0.47            | 0.02            |
| 22 ASN | CG  | 0.80           | -0.74           | 0.37           | 0.21           | -0.44           | -0.07           | 105 PHE | CA  | 0.52           | -0.97           | 0.38           | -1.30          | -0.82           | -0.83           |
| 23 ASN | OD1 | -0.87          | -0.50           | 0.10           | 0.14           | -0.25           | 0.09            | 106 PHE | C   | -2.15          | -0.29           | -0.09          | 0.39           | -0.43           | -0.57           |
| 24 ASN | ND2 | 0.40           | 0.30            | -0.15          | -0.39          | 0.05            | 0.27            | 107 PHE | O   | -2.31          | -1.27           | 0.14           | 0.12           | -1.02           | -0.24           |
| 25 ASP | N   | 1.64           | 0.74            | -2.40          | -1.75          | 1.03            | -0.10           | 108 PHE | CB  | 0.60           | -0.95           | -0.28          | -0.97          | -0.78           | -0.91           |
| 26 ASP | CA  | 1.06           | -0.57           | -0.17          | -0.56          | -0.41           | -0.28           | 109 PHE | CG  | 1.19           | -0.72           | -0.74          | -0.31          | -1.50           | -0.53           |
| 27 ASP | C   | -2.23          | -0.01           | 3.27           | 0.46           | -0.39           | -0.02           | 110 PHE | CD1 | 0.25           | -0.96           | -1.01          | -0.51          | -1.09           | -0.79           |
| 28 ASP | O   | -1.66          | -0.85           | 0.33           | 0.58           | -0.68           | 0.31            | 111 PHE | CD2 | 0.15           | -0.84           | -1.30          | -0.87          | -1.11           | -0.82           |
| 29 ASP | CB  | 0.72           | -0.61           | 0.07           | -0.56          | -0.06           | -0.30           | 112 PHE | CE1 | 0.01           | -0.78           | -0.93          | -0.17          | -1.02           | -0.81           |
| 30 ASP | CG  | -0.55          | -0.20           | 0.91           | -0.21          | -0.11           | -0.10           | 113 PHE | CE2 | 0.29           | -0.63           | -0.90          | -0.09          | -1.13           | -0.92           |
| 31 ASP | OD1 | -0.38          | 0.04            | 0.72           | 0.90           | 0.12            | 0.90            | 114 PHE | CZ  | 0.33           | -0.69           | -0.74          | 0.00           | -1.08           | -0.84           |
| 32 ASP | OD2 | -0.24          | -0.06           | 1.18           | 0.95           | 0.22            | 0.82            | 115 PRO | N   | 2.43           | 0.15            | -1.76          | -1.46          | 0.37            | -0.95           |
| 33 CYS | N   | 0.27           | -0.09           | -1.94          | -2.26          | -1.05           | -1.62           | 116 PRO | CA  | 1.06           | -0.69           | 0.12           | -0.73          | -0.36           | -0.71           |
| 34 CYS | CA  | -0.11          | -2.34           | 0.52           | -1.32          | -1.98           | -2.69           | 117 PRO | C   | -2.59          | -0.23           | -0.05          | 0.60           | -0.50           | -0.64           |
| 35 CYS | C   | -1.91          | 0.53            | 2.07           | 0.67           | -0.87           | -1.96           | 118 PRO | O   | -1.64          | -0.80           | 0.35           | 0.34           | -0.75           | -0.19           |
| 36 CYS | O   | -2.27          | -1.35           | 0.69           | -0.24          | -1.04           | -0.49           | 119 PRO | CB  | 0.53           | -0.35           | -0.35          | -0.10          | -0.20           | -0.42           |
| 37 CYS | CB  | -1.02          | -1.96           | -0.85          | -1.06          | -2.33           | -2.40           | 120 PRO | CG  | 0.64           | -0.48           | -0.20          | -0.36          | -0.38           | -0.39           |
| 38 CYS | SG  | -1.58          | -2.68           | -1.92          | -0.53          | -2.41           | -3.16           | 121 PRO | CD  | 0.63           | -0.43           | -1.43          | -1.07          | -0.40           | -0.58           |
| 39 GLN | N   | 2.24           | 1.45            | -2.35          | -1.55          | 0.48            | -0.01           | 122 SER | N   | 1.17           | 0.72            | -2.44          | -1.68          | 0.28            | -0.42           |
| 40 GLN | CA  | 0.58           | 0.06            | 2.00           | -0.98          | -0.28           | -0.31           | 123 SER | CA  | 0.57           | -0.51           | 1.41           | -0.93          | -0.42           | -0.58           |
| 41 GLN | C   | -2.20          | 1.55            | 2.53           | 1.69           | -0.01           | -0.75           | 124 SER | C   | -2.16          | 1.35            | 0.57           | 0.80           | -0.63           | -0.90           |
| 42 GLN | O   | -1.42          | -0.93           | 0.33           | 0.67           | -0.37           | 0.03            | 125 SER | O   | -1.80          | -1.02           | -0.09          | 0.32           | -0.83           | -0.13           |
| 43 GLN | CB  | 0.37           | 0.12            | 1.23           | -0.59          | -0.41           | -0.33           | 126 SER | CB  | 0.41           | -0.35           | 0.31           | -0.45          | -0.15           | -0.60           |
| 44 GLN | CG  | 1.24           | 0.06            | 0.39           | -0.41          | -0.02           | -0.53           | 127 SER | OG  | -0.40          | -0.65           | -0.22          | -0.21          | -0.38           | 0.25            |
| 45 GLN | CD  | 0.18           | -0.34           | -0.08          | 0.72           | -0.96           | -0.65           | 128 THR | N   | 0.99           | 0.46            | -2.15          | -1.86          | 0.14            | -0.18           |
| 46 GLN | OE1 | 0.12           | -0.51           | 0.15           | 0.43           | -0.15           | 0.41            | 129 THR | CA  | -0.20          | -0.43           | 0.84           | -1.42          | -0.62           | -0.34           |
| 47 GLN | NE2 | 0.12           | -0.22           | -0.38          | -0.49          | -0.21           | 0.09            | 130 THR | C   | -2.15          | 0.66            | 2.69           | -0.19          | -0.69           | -0.84           |
| 48 GLU | N   | 1.83           | 1.86            | -2.59          | -1.65          | 0.56            | 0.31            | 131 THR | O   | -1.83          | -1.35           | 0.29           | 0.53           | -0.76           | 0.08            |
| 49 GLU | CA  | 1.26           | 0.50            | 1.54           | -0.86          | -0.62           | -0.49           | 132 THR | CB  | 0.56           | -0.24           | 0.01           | -0.91          | -0.59           | -0.72           |
| 50 GLU | C   | -2.49          | 1.47            | 2.55           | 1.45           | -0.02           | -0.67           | 133 THR | OG1 | -0.34          | -0.40           | -0.26          | -0.65          | -0.53           | -0.13           |
| 51 GLU | O   | -1.69          | -0.54           | 0.84           | 0.53           | -0.58           | 0.20            | 134 THR | CG2 | 0.12           | -0.17           | -0.49          | -0.27          | -0.47           | -0.30           |
| 52 GLU | CB  | 1.18           | 0.21            | 0.82           | -0.47          | -0.13           | -0.02           | 135 TRP | N   | 0.94           | 1.70            | -1.63          | -2.12          | 0.33            | -0.08           |
| 53 GLU | CG  | 0.92           | 0.75            | 0.41           | -0.15          | 0.40            | -0.07           | 136 TRP | CA  | 0.18           | -0.89           | 1.03           | -1.58          | 0.03            | -0.78           |
| 54 GLU | CD  | 0.80           | -0.46           | 0.80           | 0.26           | -0.17           | 0.11            | 137 TRP | C   | -2.14          | 1.27            | 4.00           | 0.46           | -0.40           | -0.49           |
| 55 GLU | OE1 | 0.56           | -0.37           | 0.43           | 0.91           | 0.07            | 0.84            | 138 TRP | O   | -2.22          | -1.17           | 1.82           | 0.47           | -0.78           | -0.31           |
| 56 GLU | OE2 | -0.26          | 0.40            | 1.13           | 1.23           | 0.43            | 1.04            | 139 TRP | CB  | 0.46           | -0.49           | -0.76          | -1.28          | -0.77           | -0.56           |
| 57 GLY | N   | 0.80           | 0.31            | -2.14          | -1.93          | -0.25           | -0.35           | 140 TRP | CG  | 1.49           | -0.57           | 0.26           | 1.38           | -0.81           | -0.51           |
| 58 GLY | CA  | 0.46           | -0.43           | -0.06          | -0.87          | -0.24           | -0.51           | 141 TRP | CD1 | 0.21           | -0.39           | -0.57          | -0.16          | -0.54           | -0.72           |
| 59 GLY | C   | -1.74          | -0.74           | 0.23           | 0.10           | -0.72           | -0.90           | 142 TRP | CD2 | 1.42           | -1.23           | -0.16          | 1.21           | -1.33           | -0.25           |
| 60 GLY | O   | -1.68          | -0.95           | -0.56          | 0.14           | -0.69           | 0.17            | 143 TRP | NE1 | 0.63           | -0.50           | 0.03           | -0.56          | -0.46           | -0.64           |
| 61 HIS | N   | 1.26           | 0.57            | -2.46          | -1.98          | -0.22           | -0.78           | 144 TRP | CE2 | 0.76           | 0.09            | 1.37           | 1.30           | -1.56           | -0.24           |
| 62 HIS | CA  | 0.79           | -0.50           | -0.56          | -0.55          | -0.18           | -0.94           | 145 TRP | CE3 | -0.57          | -1.03           | -1.90          | -0.63          | -0.78           | -0.58           |
| 63 HIS | C   | -2.30          | 0.74            | 1.92           | -0.06          | -0.43           | -0.29           | 146 TRP | CZ2 | -0.11          | -0.36           | -0.66          | -0.20          | -1.05           | -0.44           |
| 64 HIS | O   | -1.71          | -1.19           | -0.44          | 0.24           | -0.66           | 0.18            | 147 TRP | CZ3 | -0.58          | -1.16           | -1.13          | -0.47          | -1.01           | -0.36           |
| 65 HIS | CB  | -0.18          | -0.68           | -0.09          | -0.92          | -0.48           | -1.00           | 148 TRP | CH2 | 0.27           | -0.63           | -0.90          | 0.12           | -1.06           | -0.23           |
| 66 HIS | CG  | 0.46           | -0.88           | 0.07           | 0.01           | -0.48           | -0.43           | 149 TYR | N   | 1.09           | 1.21            | -2.01          | -2.03          | 0.53            | -0.18           |
| 67 HIS | ND1 | -0.21          | -0.34           | 0.61           | -0.23          | -0.41           | -0.92           | 150 TYR | CA  | 0.40           | -0.57           | 0.28           | -1.53          | -0.73           | -0.78           |
| 68 HIS | CD2 | 0.51           | -0.12           | 0.17           | -0.25          | -0.45           | -0.44           | 151 TYR | C   | -2.18          | 1.29            | 1.05           | -0.06          | -0.38           | -0.94           |
| 69 HIS | CE1 | 0.34           | -0.40           | -0.74          | -0.48          | -0.46           | -0.28           | 152 TYR | O   | -2.21          | -1.05           | 0.38           | 0.11           | -0.88           | 0.00            |
| 70 HIS | NE2 | -0.06          | -0.25           | -0.85          | -0.68          | -0.09           | -0.19           | 153 TYR | CB  | 0.25           | -0.65           | -0.02          | -0.84          | -0.82           | -0.95           |
| 71 ILE | N   | 1.25           | 0.41            | -2.15          | -2.05          | 0.79            | -0.13           | 154 TYR | CG  | 0.76           | -0.19           | 1.15           | 0.55           | -1.03           | -0.33           |
| 72 ILE | CA  | 0.27           | -0.64           | 1.00           | -1.51          | -0.70           | -0.94           | 155 TYR | CD1 | -0.03          | -0.78           | -1.42          | -0.84          | -0.74           | -0.56           |
| 73 ILE | C   | -2.30          | 0.43            | 4.00           | 0.70           | 0.33            | -1.08           | 156 TYR | CD2 | 0.60           | -0.74           | -1.15          | -0.35          | -0.77           | -0.70           |
| 74 ILE | O   | -2.15          | -1.28           | 0.40           | 0.14           | -0.87           | -0.23           | 157 TYR | CE1 | 0.20           | -0.51           | -0.80          | -0.23          | -0.67           | -0.28           |
| 75 ILE | CB  | 1.67           | -1.23           | -0.10          | -1.04          | -0.74           | -0.68           | 158 TYR | CE2 | 0.42           | -0.34           | -0.67          | -0.01          | -0.80           | -0.41           |
| 76 ILE | CG1 | 0.38           | -0.25           | -0.83          | -0.91          | -1.01           | -1.02           | 159 TYR | CZ  | 0.33           | -0.76           | -0.19          | 0.65           | -1.05           | -0.27           |
| 77 ILE | CG2 | 0.24           | -0.40           | -0.61          | 0.03           | -0.64           | -0.90           | 160 TYR | OH  | -0.09          | -0.72           | -0.31          | 0.02           | -0.47           | 0.26            |
| 78 ILE | CD1 | 0.22           | -0.81           | -0.85          | 0.04           | -0.80           | -0.74           | 161 VAL | N   | 2.46           | 0.72            | -1.60          | -2.03          | 0.70            | 0.12            |
| 79 LEU | N   | 1.78           | 0.78            | -2.06          | -2.04          | 0.98            | 0.00            | 162 VAL | CA  | 1.04           | -0.75           | 1.31           | -1.15          | -0.67           | -0.67           |
| 80 LEU | CA  | 1.12           | -0.43           | 1.01           | -0.88          | -0.86           | -0.92           | 163 VAL | C   | -2.30          | 0.02            | 2.46           | 1.21           | -0.39           | -0.70           |
| 81 LEU | C   | -2.15          | 1.65            | 0.34           | 0.01           | -0.48           | -0.64           | 164 VAL | O   | -2.01          | -1.30           | 0.06           | 0.09           | -0.73           | -0.10           |
| 82 LEU | O   | -2.14          | -0.97           | 0.28           | 0.25           | -0.99           | -0.28           | 165 VAL | CB  | 1.07           | -1.00           | -0.46          | -0.98          | -0.90           | -0.71           |
|        |     |                |                 |                |                |                 |                 | 166 VAL | CG1 | 0.20           | -0.32           | -0.65          | -0.06          | -0.72           | -0.88           |
|        |     |                |                 |                |                |                 |                 | 167 VAL | CG2 | 0.64           | -0.87           | -0.68          | -0.54          | -0.79           | -0.99           |

Table 3. (continued)

|        |     | 39<br>GLN<br>N | 40<br>GLN<br>CA | 41<br>GLN<br>C | 42<br>GLN<br>O | 43<br>GLN<br>CB | 44<br>GLN<br>CG | 45<br>GLN<br>CD | 46<br>GLN<br>OE1 | 47<br>GLN<br>NE2 |         |     | 39<br>GLN<br>N | 40<br>GLN<br>CA | 41<br>GLN<br>C | 42<br>GLN<br>O | 43<br>GLN<br>CB | 44<br>GLN<br>CG | 45<br>GLN<br>CD | 46<br>GLN<br>OE1 | 47<br>GLN<br>NE2 |
|--------|-----|----------------|-----------------|----------------|----------------|-----------------|-----------------|-----------------|------------------|------------------|---------|-----|----------------|-----------------|----------------|----------------|-----------------|-----------------|-----------------|------------------|------------------|
| 0 SAS  | SAS | 1.86           | 1.16            | 1.88           | 0.94           | 0.83            | 0.57            | 0.71            | 0.22             | 0.24             | 83 LEU  | CB  | 1.03           | -1.11           | 0.58           | -1.07          | -0.37           | 0.02            | -0.59           | -0.04            | 0.06             |
| 1 ALA  | N   | 2.03           | 0.61            | -2.59          | -1.83          | 0.93            | 0.90            | 1.16            | -0.05            | 0.72             | 84 LEU  | CG  | 0.89           | -0.35           | -0.55          | -0.97          | -0.33           | -0.09           | -1.00           | 0.29             | 0.05             |
| 2 ALA  | CA  | 0.98           | 0.15            | 1.15           | -0.16          | -0.79           | -0.25           | -0.89           | -0.62            | -0.41            | 85 LEU  | CD1 | 0.67           | -0.77           | -0.69          | 0.20           | -0.46           | -0.43           | -0.63           | -0.11            | 0.08             |
| 3 ALA  | C   | -2.61          | 0.67            | 1.63           | 0.90           | 0.61            | -0.36           | -0.02           | 0.32             | 0.14             | 86 LEU  | CD2 | 0.93           | -0.44           | -0.46          | 0.30           | -0.50           | -0.36           | -0.77           | -0.23            | -0.10            |
| 4 ALA  | O   | -1.84          | -0.54           | 1.08           | 1.05           | -0.92           | -0.72           | 0.32            | 0.42             | -0.27            | 87 LYS  | N   | 1.37           | 1.11            | -2.60          | -2.06          | 0.76            | 1.14            | 1.09            | -0.15            | 0.66             |
| 5 ALA  | CB  | 0.72           | -1.06           | -0.35          | -0.71          | -0.10           | 0.03            | -0.39           | 0.00             | 0.06             | 88 LYS  | CA  | 1.52           | -0.44           | 0.57           | -0.56          | -1.03           | -0.59           | -1.45           | -0.79            | -0.74            |
| 6 ARG  | N   | 1.56           | 1.71            | -2.52          | -2.02          | 0.63            | 0.98            | 1.25            | -0.04            | 0.64             | 89 LYS  | C   | -2.58          | 0.94            | 3.65           | 0.99           | 0.61            | -0.35           | -0.04           | 0.24             | -0.20            |
| 7 ARG  | CA  | 1.20           | -0.60           | 1.12           | -0.65          | -1.12           | -0.36           | -0.87           | -1.00            | -0.65            | 90 LYS  | O   | -2.05          | -0.34           | 1.16           | 0.75           | -1.15           | -0.82           | 0.46            | 0.69             | -0.16            |
| 8 ARG  | C   | -2.58          | 0.63            | 2.38           | 0.84           | 0.52            | -0.32           | 0.04            | 0.61             | -0.19            | 91 LYS  | CB  | 0.94           | -1.19           | 0.09           | -1.21          | -0.39           | -0.09           | -0.76           | -0.24            | -0.31            |
| 9 ARG  | O   | -2.12          | -0.81           | 0.61           | 0.68           | -1.15           | -0.95           | 0.25            | 0.50             | -0.16            | 92 LYS  | CG  | 0.97           | -0.54           | -0.49          | -0.92          | -0.44           | -0.07           | -0.95           | -0.48            | -0.35            |
| 10 ARG | CB  | 1.19           | -1.09           | 0.01           | -1.20          | -0.37           | 0.06            | -0.70           | -0.25            | -0.23            | 93 LYS  | CD  | 1.94           | -0.66           | -0.25          | -0.21          | -0.03           | 0.38            | -0.82           | -0.76            | -0.41            |
| 11 ARG | CG  | 0.97           | -0.46           | -0.10          | -0.84          | -0.41           | -0.51           | -1.18           | -0.61            | -0.32            | 94 LYS  | CE  | 1.80           | -0.26           | -0.10          | -0.14          | -0.17           | 0.50            | -0.34           | -0.77            | -0.31            |
| 12 ARG | CD  | 1.29           | -0.75           | 0.14           | -0.29          | -0.23           | -0.06           | -0.92           | -0.96            | -0.47            | 95 LYS  | NZ  | 2.06           | 0.48            | 0.57           | -0.02          | 0.45            | 0.71            | 0.32            | -0.58            | -0.01            |
| 13 ARG | NE  | 1.56           | -0.35           | 0.00           | -0.15          | 0.03            | -0.10           | -0.39           | -0.94            | -0.20            | 96 MET  | N   | 1.22           | 1.13            | -2.68          | -1.76          | 0.45            | 0.75            | 1.28            | 0.00             | 0.46             |
| 14 ARG | CZ  | 1.09           | -1.14           | -0.53          | 0.18           | -0.48           | -0.75           | -1.23           | -0.13            | -0.22            | 97 MET  | CA  | 1.61           | 0.18            | 0.59           | -0.48          | -0.79           | -0.50           | -0.70           | -0.71            | -0.27            |
| 15 ARG | NH1 | 0.67           | -0.64           | -0.28          | -0.18          | -0.46           | -0.14           | -0.50           | -0.98            | -0.13            | 98 MET  | C   | -2.81          | 0.07            | 1.94           | 0.32           | 0.18            | -0.53           | 0.10            | 0.33             | -0.22            |
| 16 ARG | NH2 | 1.10           | -0.36           | -0.03          | -0.04          | -0.23           | -0.09           | -0.43           | -0.75            | -0.12            | 99 MET  | O   | -1.78          | -1.18           | 0.80           | 0.96           | -0.70           | -0.71           | 0.38            | 0.46             | -0.19            |
| 17 ASN | N   | 1.31           | 0.68            | -2.34          | -2.03          | 0.66            | 0.54            | 0.48            | -0.53            | 0.20             | 100 MET | CB  | 0.62           | -1.18           | -0.07          | -0.90          | -0.36           | -0.22           | -0.71           | -0.21            | -0.04            |
| 18 ASN | CA  | 0.87           | -0.54           | 1.78           | -0.57          | -0.53           | -0.45           | -0.69           | -0.40            | -0.71            | 101 MET | CG  | 1.10           | -0.41           | -0.08          | -0.42          | -0.43           | -0.27           | -0.73           | -0.28            | -0.14            |
| 19 ASN | C   | -2.48          | 0.23            | 3.10           | 0.97           | 1.02            | -0.22           | -0.63           | 0.06             | -0.43            | 102 MET | SD  | 0.57           | -0.90           | -0.62          | 0.54           | -0.82           | -0.58           | -0.82           | 0.21             | -0.02            |
| 20 ASN | O   | -2.12          | -0.64           | 0.66           | 0.73           | -0.92           | -1.10           | -0.12           | 0.35             | -0.51            | 103 MET | CE  | 0.68           | -0.60           | -0.74          | 0.08           | -0.69           | -0.44           | -0.64           | -0.10            | -0.11            |
| 21 ASN | CB  | 0.66           | -0.91           | 0.17           | -0.95          | -0.38           | -0.22           | -0.78           | -0.67            | -0.46            | 104 PHE | N   | 2.28           | 1.06            | -2.42          | -1.78          | 1.21            | 1.27            | 1.90            | 0.04             | 0.65             |
| 22 ASN | CG  | 0.46           | -0.34           | 0.41           | -1.17          | -0.57           | -0.65           | -1.01           | -0.25            | -0.45            | 105 PHE | CA  | 1.10           | -0.47           | 1.41           | -0.96          | -0.62           | -0.27           | -0.43           | -0.71            | -0.16            |
| 23 ASN | CD1 | -1.02          | -0.46           | 0.11           | 0.24           | -0.64           | -0.67           | -0.12           | -0.08            | -0.85            | 106 PHE | C   | -2.50          | 0.94            | 1.45           | 0.65           | 0.61            | -0.08           | -0.07           | 0.34             | -0.04            |
| 24 ASN | ND2 | 0.37           | -0.68           | -0.34          | -0.57          | -0.32           | -0.59           | -0.67           | -0.75            | -0.48            | 107 PHE | O   | -1.85          | -0.98           | 0.54           | 0.77           | -0.75           | -0.60           | 0.71            | 0.47             | -0.11            |
| 25 ASP | N   | 1.83           | 1.20            | -2.39          | -2.03          | 0.44            | 0.81            | 0.90            | -0.28            | 0.35             | 108 PHE | CB  | 1.07           | -0.74           | 0.53           | -0.71          | -0.15           | -0.02           | -0.66           | -0.17            | -0.22            |
| 26 ASP | CA  | 0.87           | -0.23           | 1.03           | -0.04          | -1.05           | -0.37           | -0.76           | -0.39            | -0.63            | 109 PHE | CG  | 1.85           | -0.45           | 1.38           | 0.25           | -0.43           | -0.87           | -1.56           | 0.19             | 0.17             |
| 27 ASP | C   | -2.57          | 1.07            | 1.78           | 1.00           | 0.94            | -0.33           | -0.78           | 0.13             | -0.14            | 110 PHE | CD1 | 0.58           | -0.52           | -1.05          | -0.48          | -0.58           | -0.48           | -0.91           | -0.31            | -0.12            |
| 28 ASP | O   | -2.04          | -0.29           | 0.41           | 1.02           | -1.07           | -0.91           | 0.45            | 0.41             | -0.25            | 111 PHE | CD2 | 0.72           | -0.65           | -0.73          | -0.13          | -0.44           | -0.29           | -0.86           | -0.27            | 0.02             |
| 29 ASP | CB  | 0.81           | -0.65           | 0.57           | -0.87          | -0.05           | -0.08           | -0.39           | -0.31            | -0.31            | 112 PHE | CE1 | 0.84           | -0.58           | -0.55          | 0.26           | -0.78           | -0.60           | -0.87           | -0.19            | -0.19            |
| 30 ASP | CG  | -0.34          | -0.61           | 0.30           | -1.32          | -0.57           | -0.72           | 0.27            | 0.12             | -0.40            | 113 PHE | CE2 | 0.33           | -0.57           | -0.69          | 0.04           | -0.75           | -0.67           | -0.76           | 0.02             | -0.10            |
| 31 ASP | OD1 | -0.79          | 0.17            | 0.88           | 0.71           | -0.25           | -0.39           | 0.55            | -0.04            | -0.71            | 114 PHE | CZ  | 0.73           | -0.85           | -0.44          | 0.09           | -0.73           | -0.51           | -1.04           | -0.09            | -0.21            |
| 32 ASP | OD2 | -0.48          | -0.47           | 0.28           | 0.49           | -0.12           | -0.70           | 0.61            | 0.08             | -0.48            | 115 PRO | N   | 2.44           | 1.22            | -1.10          | -1.26          | 0.35            | -0.25           | -0.21           | -0.01            | -0.39            |
| 33 CYS | N   | 2.24           | 0.54            | -2.23          | -1.42          | 0.33            | 1.21            | 0.14            | 0.13             | 0.10             | 116 PRO | CA  | 1.15           | -0.53           | 0.13           | -0.42          | -0.85           | -0.49           | -1.17           | -0.89            | -0.49            |
| 34 CYS | CA  | 1.43           | 0.05            | 1.51           | -0.89          | 0.10            | 0.04            | -0.36           | -0.48            | -0.23            | 117 PRO | C   | -2.66          | 0.29            | 0.64           | 0.15           | 0.26            | -0.23           | 0.01            | -0.12            | -0.06            |
| 35 CYS | C   | -2.31          | 2.03            | 2.53           | 0.32           | 1.24            | 0.41            | -0.08           | 0.20             | -0.36            | 118 PRO | O   | -1.98          | -0.06           | 0.40           | 0.71           | -1.08           | -0.89           | 0.69            | 0.14             | -0.38            |
| 36 CYS | O   | -1.55          | -1.00           | 1.72           | 0.68           | -0.61           | -0.40           | 0.71            | 0.46             | -0.47            | 119 PRO | CB  | 0.70           | 0.08            | -0.55          | 0.03           | -0.26           | -0.31           | -0.95           | -0.39            | -0.33            |
| 37 CYS | CB  | 0.50           | -0.28           | -0.01          | -0.37          | -0.42           | -0.03           | -0.94           | -0.15            | -0.22            | 120 PRO | CG  | 0.96           | -0.35           | -0.39          | -0.19          | -0.27           | -0.02           | -0.83           | -0.38            | -0.18            |
| 38 CYS | SG  | 0.03           | -0.30           | -0.74          | 0.04           | -0.33           | -0.54           | -0.65           | 0.40             | 0.09             | 121 PRO | CD  | 1.17           | -0.24           | -1.67          | -1.02          | -0.20           | 0.06            | -0.63           | -0.31            | -0.21            |
| 39 GLN | N   | 2.41           | 1.37            | -2.54          | -2.03          | 1.08            | 1.06            | 1.56            | 0.13             | 0.81             | 122 SER | N   | 1.66           | 0.77            | -2.23          | -1.69          | 0.05            | 0.58            | 0.50            | -0.58            | 0.38             |
| 40 GLN | CA  | 1.39           | -0.22           | 1.48           | -0.24          | -1.14           | -0.59           | -1.05           | -0.62            | -0.66            | 123 SER | CA  | 0.84           | -0.48           | 0.73           | -0.56          | -0.70           | -0.45           | -0.81           | -0.63            | -0.62            |
| 41 GLN | C   | -2.51          | 1.48            | 4.00           | 1.32           | 1.04            | -0.19           | 0.10            | 0.16             | -0.01            | 124 SER | C   | -2.41          | 1.50            | 0.37           | 0.93           | 0.23            | -0.50           | 0.05            | 0.06             | -0.33            |
| 42 GLN | O   | -2.04          | -0.27           | 1.33           | 0.75           | -1.15           | -0.97           | 0.12            | 0.42             | -0.27            | 125 SER | O   | -1.99          | -0.77           | 0.74           | 0.42           | -1.04           | -0.91           | 0.02            | 0.25             | -0.47            |
| 43 GLN | CB  | 1.09           | -1.13           | 1.03           | -1.15          | 0.20            | 0.14            | -0.15           | 0.09             | -0.10            | 126 SER | CB  | 0.52           | -0.58           | -0.03          | -0.62          | -0.24           | -0.22           | -0.50           | -0.34            | -0.27            |
| 44 GLN | CG  | 1.10           | -0.58           | -0.19          | -0.97          | 0.15            | -0.13           | -0.52           | -0.53            | -0.30            | 127 SER | OG  | -0.64          | -0.41           | 0.12           | -0.24          | -0.56           | -0.51           | -0.15           | -0.36            | -0.46            |
| 45 GLN | CD  | 1.60           | -1.04           | 0.10           | 0.09           | -0.14           | -0.52           | -0.62           | -0.20            | -0.42            | 128 THR | N   | 1.16           | 1.33            | -2.15          | -1.89          | -0.26           | 0.61            | -0.07           | -0.88            | 0.01             |
| 46 GLN | OE1 | 0.12           | -0.59           | 0.13           | 0.39           | 0.15            | -0.46           | -0.21           | 0.05             | -0.68            | 129 THR | CA  | 1.44           | -0.79           | 1.18           | -0.88          | -0.73           | -0.55           | -0.68           | -0.58            | -0.55            |
| 47 GLN | NE2 | 0.83           | -0.64           | -0.02          | -0.30          | -0.08           | -0.27           | -0.44           | -0.69            | -0.18            | 130 THR | C   | -2.58          | 1.21            | 2.70           | 1.02           | 0.28            | -0.21           | -0.33           | 0.05             | -0.31            |
| 48 GLU | N   | 1.97           | 1.31            | -2.61          | -2.07          | 1.01            | 0.98            | 0.80            | 0.13             | 0.50             | 131 THR | O   | -1.99          | -0.62           | 1.56           | 0.88           | -1.03           | -0.80           | 0.30            | 0.37             | -0.42            |
| 49 GLU | CA  | 1.93           | 0.23            | 1.81           | -0.21          | -1.19           | -0.61           | -1.09           | -0.76            | -0.66            | 132 THR | CB  | 0.20           | -0.87           | 0.83           | -0.80          | -0.31           | -0.39           | -0.54           | -0.60            | -0.44            |
| 50 GLU | C   | -2.54          | 0.19            | 1.87           | 1.45           | 0.72            | -0.05           | -0.51           | 0.42             | -0.24            | 133 THR | OG1 | -0.77          | -0.51           | 0.37           | -0.44          | -0.56           | -0.86           | -0.42           | -0.44            | -0.64            |
| 51 GLU | O   | -2.05          | -0.55           | 1.10           | 1.30           | -1.18           | -0.93           | -0.03           | 0.47             | -0.13            | 134 THR | CG2 | 0.64           | -0.23           | -0.25          | -0.14          | -0.32           | -0.50           | -0.86           | -0.34            | -0.40            |
| 52 GLU | CB  | 1.03           | -1.20           | 0.76           | -1.05          | 0.23            | -0.02           | -0.37           | -0.06            | -0.32            | 135 TRP | N   | 2.06           | 0.49            | -2.72          | -1.81          | 0.56            | 0.85            | 1.15            | 0.29             | 0.46             |
| 53 GLU | CG  | 0.82           | -0.54           | 0.52           | -0.88          | 0.26            | -0.35           | -0.46           | -0.22            | -0.55            | 136 TRP | CA  | 0.76           | -0.97           | 1.03           | -0.92          | -0.95           | -0.79           | -1.09           | -0.48            | -0.84            |
| 54 GLU | CD  | 0.89           | -0.80           | -0.47          | 0.13           | -0.33           | -0.93           | -0.45           | 0.14             | -0.35            | 137 TRP | C   | -2.54          | 0.49            | 4.00           | 0.81           | -0.09           | -0.62           | -0.11           | 1.13             | -0.14            |
| 55 GLU | OE1 | 0.03           | -0.55           | 0.96           | 1.20           | 0.15            | -0.28           | 0.42            | 0.31             | -0.34            | 138 TRP | O   | -1.98          | -0.81           | 1.25           | 0.77           | -1.11           | -0.71           | 0.25            | 0.71             | -0.48            |
| 56 GLU | OE2 | 0.40           | -0.18           | 1.01           | 1.27           | 0.20            | -0.47           | 0.55            | 0.18             | -0.55            | 139 TRP | CB  | 1.16           | -0.90           | -0.33          | -0.76          | -0.29           | -0.39           | -0.61           | 0.01             | 0.19             |
| 57 GLY | N   | 1.23           | 0.38            | -2.30          | -1.63          | 0.26            | 0.40            | 0.21            | -0.27            | 0.29             | 140 TRP | CG  | 1.03           | -1.42           | -0.60          | 0.19           | -1.07           | -0.74           | -1.03           | -0.04            | 0.27             |
| 58 GLY | CA  | 0.89           | -0.03           | 0.08           | -0.66          | -0.23           | -0.10           | -0.71           | -0.53            | -0.38            | 141 TRP | CD1 | 0.17           | -0.83           | -1.27          | -0.77          | -0.82           | -0.30           | -0.52           | -0.31            | -0.25            |
| 59 GLY | C   | -1.75          | 0.10            | 1.25           | 0.69           | -0.20           | -0.48           | -0.78           | -0.44            | -0.40            | 142 TRP | CD2 | -0.37          | -1.07           | -0.23          | 0.56           | -1.28           | -1.25           | -0.59           | 0.17             | -0.27            |
| 60 GLY | O   | -1.51          | -0.84           | 0.64           | 0.93           | -0.66           | -0.72           | 0.10            | 0.48             | -0.47            | 143 TRP | NE1 | 1.23           | -0.32           | 0.11           | -0.25          | -0.83           | -0.45           | -0.84           | -1.02            |                  |

Table 3. (continued)

|        |     | 48<br>GLU<br>N | 49<br>GLU<br>CA | 50<br>GLU<br>C | 51<br>GLU<br>O | 52<br>GLU<br>CB | 53<br>GLU<br>CG | 54<br>GLU<br>CD | 55<br>GLU<br>OE1 | 56<br>GLU<br>OE2 |         |     | 48<br>GLU<br>N | 49<br>GLU<br>CA | 50<br>GLU<br>C | 51<br>GLU<br>O | 52<br>GLU<br>CB | 53<br>GLU<br>CG | 54<br>GLU<br>CD | 55<br>GLU<br>OE1 | 56<br>GLU<br>OE2 |
|--------|-----|----------------|-----------------|----------------|----------------|-----------------|-----------------|-----------------|------------------|------------------|---------|-----|----------------|-----------------|----------------|----------------|-----------------|-----------------|-----------------|------------------|------------------|
| 0 SAS  | SAS | 1.62           | 0.95            | 1.83           | 0.87           | 0.59            | 0.38            | 0.52            | 0.04             | 0.01             | 83 LEU  | CB  | 1.23           | -0.92           | 0.52           | -0.91          | -0.06           | 0.19            | 0.02            | 0.61             | 0.61             |
| 1 ALA  | N   | 2.08           | 0.93            | -2.65          | -1.94          | 0.81            | 0.58            | 1.03            | 0.44             | 0.50             | 84 LEU  | CG  | 0.75           | -0.38           | 0.05           | -0.93          | 0.09            | -0.12           | -0.11           | 0.54             | 0.70             |
| 2 ALA  | CA  | 1.53           | 0.84            | 1.47           | -0.19          | -0.89           | -0.14           | -0.58           | -0.48            | 0.16             | 85 LEU  | CD1 | 0.75           | -0.82           | -0.59          | 0.36           | -0.28           | -0.41           | -0.34           | 0.50             | 0.48             |
| 3 ALA  | C   | -2.64          | 0.97            | 3.36           | 1.18           | 0.76            | 0.27            | -0.06           | 0.75             | 0.73             | 86 LEU  | CD2 | 1.09           | -0.40           | -0.27          | 0.59           | -0.30           | -0.36           | -0.49           | 0.15             | 0.36             |
| 4 ALA  | O   | -1.95          | -0.27           | 1.10           | 1.21           | -1.12           | -0.37           | 0.88            | 1.18             | 1.27             | 87 LYS  | N   | 1.25           | 0.87            | -2.75          | -2.39          | 0.41            | 0.65            | 0.73            | 0.15             | 0.05             |
| 5 ALA  | CB  | 0.80           | -0.89           | -0.02          | -0.83          | 0.01            | 0.01            | -0.11           | 0.37             | 0.37             | 88 LYS  | CA  | 1.06           | -0.80           | -0.07          | -0.72          | -1.29           | -0.80           | -1.25           | -0.82            | -0.39            |
| 6 ARG  | N   | 1.57           | 1.01            | -2.72          | -2.37          | 0.67            | 0.58            | 1.16            | 0.22             | 0.07             | 89 LYS  | C   | -2.56          | 1.27            | 1.64           | 0.70           | 0.19            | -0.27           | -0.37           | 0.67             | 0.60             |
| 7 ARG  | CA  | 1.56           | -0.52           | 0.35           | -0.55          | -0.86           | -0.53           | -0.88           | -0.68            | -0.25            | 90 LYS  | O   | -2.34          | -0.71           | 0.94           | 0.72           | -1.27           | -1.03           | 0.25            | 1.03             | 0.93             |
| 8 ARG  | C   | -2.60          | 0.22            | -1.62          | 0.44           | 0.20            | -0.40           | -0.61           | 0.47             | 0.60             | 91 LYS  | CB  | 0.32           | -1.54           | -0.15          | -1.58          | -0.80           | -0.58           | -0.98           | -0.28            | -0.36            |
| 9 ARG  | O   | -2.30          | -0.70           | 0.27           | 0.63           | -1.19           | -0.94           | 0.34            | 1.08             | 0.77             | 92 LYS  | CG  | 0.91           | -0.86           | -0.52          | -1.22          | -0.62           | -0.88           | -1.41           | -0.56            | -0.63            |
| 10 ARG | CB  | 0.64           | -1.43           | 0.08           | -1.48          | -0.59           | -0.61           | -1.14           | -0.48            | -0.52            | 93 LYS  | CD  | 1.29           | -1.24           | -0.44          | -0.39          | -0.56           | -0.69           | -1.69           | -1.27            | -1.10            |
| 11 ARG | CG  | 0.75           | -0.64           | -0.15          | -1.11          | -0.52           | -0.84           | -1.12           | -0.68            | -0.81            | 94 LYS  | CE  | 1.20           | -0.65           | -0.17          | -0.45          | -0.38           | -0.61           | -1.40           | -1.16            | -1.27            |
| 12 ARG | CD  | 1.21           | -0.85           | -0.09          | -0.30          | -0.18           | -0.55           | -1.28           | -1.05            | -1.11            | 95 LYS  | NZ  | 1.24           | -0.16           | -0.06          | -0.28          | -0.06           | -0.23           | -0.90           | -1.41            | -1.47            |
| 13 ARG | NE  | 1.24           | -0.79           | -0.26          | -0.33          | -0.23           | -0.57           | -1.55           | -1.73            | -1.79            | 96 MET  | N   | 1.80           | 1.07            | -2.65          | -1.63          | 1.17            | 0.69            | 0.65            | 0.02             | -0.15            |
| 14 ARG | CZ  | 0.97           | -1.27           | -0.32          | -0.01          | -0.44           | -0.57           | -0.41           | -0.20            | -0.10            | 97 MET  | CA  | 0.58           | -0.04           | 1.23           | -0.50          | -0.83           | -0.37           | -0.99           | -0.86            | -0.38            |
| 15 ARG | NH1 | 0.74           | -0.61           | -0.45          | -0.30          | -0.47           | -0.53           | -1.04           | -1.35            | -1.28            | 98 MET  | C   | -2.77          | 1.88            | 3.89           | 1.65           | 0.46            | -0.09           | 0.55            | 0.95             | 1.28             |
| 16 ARG | NH2 | 0.63           | -0.55           | -0.12          | -0.31          | -0.34           | -0.47           | -1.31           | -1.45            | -1.43            | 99 MET  | O   | -1.80          | -0.95           | 0.33           | 1.09           | -0.71           | -0.52           | 0.21            | 1.53             | 1.27             |
| 17 ASN | N   | 1.57           | 1.08            | -2.56          | -2.10          | 0.58            | 0.76            | 0.60            | -0.14            | -0.11            | 100 MET | CB  | 1.12           | -0.74           | 0.13           | -0.72          | -0.14           | -0.05           | -0.16           | 0.52             | 0.42             |
| 18 ASN | CA  | 0.57           | -0.22           | 1.30           | -0.53          | -0.59           | 0.03            | -0.46           | -0.02            | -0.07            | 101 MET | CG  | 1.11           | -0.30           | -0.07          | -0.44          | -0.20           | -0.21           | -0.25           | 0.13             | 0.37             |
| 19 ASN | C   | -2.41          | 1.47            | 1.34           | 0.45           | 0.39            | 0.04            | 0.11            | 0.84             | 0.73             | 102 MET | SD  | 0.44           | -0.70           | -0.60          | 0.63           | -0.41           | -0.48           | -0.03           | 1.02             | 0.86             |
| 20 ASN | O   | -1.87          | -0.23           | 0.94           | 0.90           | -0.77           | -0.53           | 0.33            | 1.07             | 0.99             | 103 MET | CE  | 0.96           | -0.32           | -0.64          | 0.27           | -0.36           | -0.43           | -0.32           | 0.43             | 0.33             |
| 21 ASN | CB  | 0.83           | -0.85           | 0.17           | -1.00          | -0.25           | -0.19           | -0.65           | -0.28            | -0.38            | 104 PHE | N   | 1.78           | 0.73            | -2.68          | -1.69          | 0.99            | 0.87            | 1.46            | 0.59             | 0.23             |
| 22 ASN | CG  | -0.14          | -0.20           | 0.99           | -1.07          | -0.56           | -0.66           | 0.22            | 0.62             | 0.45             | 105 PHE | CA  | 1.38           | -0.10           | 1.40           | -0.67          | -0.50           | -0.13           | -0.42           | -0.22            | -0.06            |
| 23 ASN | OD1 | -1.16          | -0.26           | 0.29           | 0.08           | -0.59           | -0.22           | 0.14            | 0.24             | 0.12             | 106 PHE | C   | -2.64          | 1.99            | 2.00           | 0.50           | 1.19            | 0.44            | 1.01            | 1.41             | 1.05             |
| 24 ASN | ND2 | 0.06           | -0.52           | -0.39          | -0.53          | -0.44           | -0.51           | -0.60           | -0.47            | -0.44            | 107 PHE | O   | -1.58          | -1.04           | 1.24           | 0.92           | -0.47           | -0.13           | 0.63            | 1.54             | 1.33             |
| 25 ASP | N   | 1.34           | 1.17            | -2.46          | -1.77          | 0.33            | 0.75            | 0.79            | 0.22             | 0.24             | 108 PHE | CB  | 1.16           | -0.51           | 0.39           | -0.63          | -0.13           | 0.00            | -0.43           | 0.45             | 0.26             |
| 26 ASP | CA  | 1.03           | 0.05            | 1.76           | 1.07           | -0.74           | -0.20           | -0.51           | -0.11            | -0.15            | 109 PHE | CG  | 2.17           | 0.02            | 0.16           | 0.86           | -0.38           | -0.52           | -0.63           | 1.20             | 1.19             |
| 27 ASP | C   | -2.57          | 1.10            | 2.23           | 1.02           | 1.17            | 0.69            | 0.11            | 0.60             | 1.02             | 110 PHE | CD1 | 0.90           | -0.53           | -0.45          | 0.01           | -0.33           | -0.27           | -0.46           | 0.35             | 0.40             |
| 28 ASP | O   | -1.95          | -0.03           | 1.11           | 1.17           | -0.97           | -0.32           | 0.72            | 1.20             | 1.34             | 111 PHE | CD2 | 0.68           | -0.54           | -0.67          | -0.14          | -0.30           | -0.23           | -0.38           | 0.47             | 0.49             |
| 29 ASP | CB  | 0.71           | -0.84           | 0.91           | -0.74          | -0.09           | -0.19           | -0.13           | 0.26             | 0.15             | 112 PHE | CE1 | 0.66           | -0.38           | -0.57          | 0.34           | -0.64           | -0.30           | -0.28           | 0.42             | 0.60             |
| 30 ASP | CG  | -0.05          | 0.18            | 1.27           | -0.51          | -0.45           | 0.00            | 0.24            | 0.33             | 0.58             | 113 PHE | CE2 | 0.78           | -0.26           | -0.16          | 0.53           | -0.56           | -0.43           | -0.54           | 0.65             | 0.35             |
| 31 ASP | OD1 | -0.89          | 0.38            | 1.08           | 0.91           | -0.27           | 0.36            | 0.57            | 0.48             | 0.58             | 114 PHE | CZ  | 0.67           | -0.30           | -0.38          | 0.54           | -0.51           | -0.37           | -0.73           | 0.29             | 0.36             |
| 32 ASP | OD2 | -0.15          | -0.07           | 0.77           | 0.82           | 0.10            | 0.30            | 0.44            | 0.43             | 0.55             | 115 PRO | N   | 2.19           | 1.36            | -1.28          | -1.31          | 0.49            | 0.00            | 0.52            | 0.57             | 0.54             |
| 33 CYS | N   | 1.83           | 1.23            | -2.52          | -1.68          | 1.15            | 0.88            | 0.76            | 0.54             | -0.22            | 116 PRO | CA  | 1.63           | -0.28           | 0.06           | -0.33          | -0.33           | -0.12           | -0.71           | -0.43            | -0.10            |
| 34 CYS | CA  | 1.84           | 0.48            | 1.42           | -0.51          | 0.19            | 0.72            | -0.45           | -0.35            | 0.44             | 117 PRO | C   | -2.83          | 0.41            | 1.04           | 1.04           | 0.66            | 0.57            | 0.51            | 0.95             | 1.15             |
| 35 CYS | C   | -2.56          | 1.57            | 2.55           | 0.82           | 0.85            | 0.43            | 0.80            | 0.46             | 1.16             | 118 PRO | O   | -1.80          | -0.07           | 0.90           | 1.38           | -0.88           | -0.26           | 0.52            | 0.92             | 0.90             |
| 36 CYS | O   | -1.65          | -0.88           | 1.48           | 0.54           | -0.47           | -0.15           | 0.28            | 0.95             | 1.27             | 119 PRO | CB  | 0.21           | 0.08            | -0.42          | -0.02          | -0.53           | -0.44           | -0.83           | -0.29            | -0.18            |
| 37 CYS | CB  | 0.58           | -0.62           | -0.02          | -0.57          | -0.14           | 0.38            | -0.16           | 0.03             | 0.43             | 120 PRO | CG  | 0.82           | -0.50           | -0.45          | -0.29          | -0.22           | -0.28           | -0.67           | -0.01            | -0.01            |
| 38 CYS | SG  | 0.34           | -0.48           | -0.65          | 0.18           | -0.02           | -0.08           | 0.11            | 0.82             | 0.98             | 121 PRO | CD  | 1.14           | -0.07           | -1.56          | -1.10          | -0.06           | -0.06           | -0.26           | 0.06             | 0.38             |
| 39 GLN | N   | 1.97           | 1.93            | -2.58          | -2.04          | 1.01            | 0.79            | 0.86            | 0.05             | 0.41             | 122 SER | N   | 1.23           | 1.10            | -2.28          | -1.75          | -0.29           | 0.66            | -0.04           | -0.71            | -0.27            |
| 40 GLN | CA  | 1.33           | 0.22            | 0.19           | -0.50          | -1.21           | -0.55           | -0.82           | -0.59            | -0.23            | 123 SER | CA  | 1.41           | -0.37           | 1.10           | -0.13          | -0.49           | 0.07            | -0.41           | -0.43            | -0.14            |
| 41 GLN | C   | -2.58          | 1.86            | 1.87           | 1.05           | 0.77            | 0.52            | -0.47           | 0.96             | 1.02             | 124 SER | C   | -2.68          | 1.45            | 2.82           | 1.26           | 0.88            | 0.52            | 0.34            | 0.59             | 1.17             |
| 42 GLN | O   | -2.08          | -0.25           | 1.48           | 1.30           | -1.06           | -0.90           | 0.14            | 1.24             | 1.31             | 125 SER | O   | -1.87          | -0.38           | 0.76           | 0.81           | -0.84           | -0.26           | 0.75            | 1.24             | 1.24             |
| 43 GLN | CB  | 1.03           | -1.19           | 0.72           | -1.18          | 0.22            | 0.26            | -0.32           | 0.10             | 0.12             | 126 SER | CB  | 0.40           | -0.57           | 0.29           | -0.65          | -0.24           | -0.38           | -0.67           | -0.32            | -0.43            |
| 44 GLN | CG  | 0.99           | -0.61           | -0.05          | -0.92          | -0.02           | -0.35           | -0.92           | -0.36            | -0.52            | 127 SER | OG  | -1.00          | -0.39           | 0.72           | -0.38          | -0.76           | -0.70           | -0.51           | -0.59            | -0.60            |
| 45 GLN | CD  | 0.83           | -1.08           | -0.51          | -0.03          | -0.37           | -0.47           | -0.45           | 0.41             | 0.54             | 128 THR | N   | 1.96           | 1.60            | -2.41          | -1.82          | -0.34           | 0.46            | 0.18            | -0.77            | -0.26            |
| 46 GLN | OE1 | 0.11           | -0.73           | 0.41           | 0.44           | 0.00            | -0.13           | 0.14            | 0.31             | 0.18             | 129 THR | CA  | 1.44           | -0.86           | 0.47           | -0.43          | -0.63           | -0.22           | -0.60           | -0.51            | -0.13            |
| 47 GLN | NE2 | 0.52           | -0.65           | -0.25          | -0.16          | -0.30           | -0.52           | -0.36           | -0.37            | -0.58            | 130 THR | C   | -2.87          | 1.40            | 3.22           | 1.59           | 0.61            | -0.07           | 0.21            | 1.10             | 1.00             |
| 48 GLU | N   | 2.19           | 1.92            | -2.56          | -1.87          | 1.08            | 1.04            | 0.99            | 0.71             | 0.92             | 131 THR | O   | -2.02          | -0.49           | 0.91           | 0.92           | -0.87           | -0.55           | 0.70            | 1.24             | 1.23             |
| 49 GLU | CA  | 1.90           | 0.34            | 1.21           | 0.11           | -0.99           | -0.16           | -0.62           | -0.38            | 0.12             | 132 THR | CB  | -0.23          | -0.87           | 0.13           | -0.84          | -0.56           | -0.28           | -0.88           | -0.67            | -0.41            |
| 50 GLU | C   | -2.53          | 1.21            | 3.44           | 1.77           | 1.09            | 0.37            | 0.18            | 1.15             | 1.06             | 133 THR | OG1 | -1.13          | -0.49           | 0.24           | -0.60          | -0.88           | -0.89           | -0.32           | -0.45            | -0.33            |
| 51 GLU | O   | -1.88          | 0.10            | 1.82           | 1.19           | -0.97           | -0.54           | 0.78            | 1.22             | 1.28             | 134 THR | CG2 | 0.36           | -0.23           | -0.16          | 0.04           | -0.35           | -0.51           | -0.85           | -0.26            | -0.16            |
| 52 GLU | CB  | 1.10           | -0.98           | 1.09           | -0.98          | 0.41            | 0.27            | 0.29            | 0.71             | 0.47             | 135 TRP | N   | 1.34           | 1.05            | -2.62          | -1.78          | 0.88            | 0.90            | 1.45            | 0.58             | 0.49             |
| 53 GLU | CG  | 1.08           | -0.15           | 0.37           | -0.56          | 0.28            | 0.33            | 0.18            | 0.30             | 0.24             | 136 TRP | CA  | 0.69           | -0.32           | 1.42           | -0.33          | -0.99           | 0.27            | 0.15            | -0.58            | 0.60             |
| 54 GLU | CD  | 1.03           | -0.59           | 0.18           | 0.75           | 0.29            | 0.19            | 0.52            | 0.90             | 0.96             | 137 TRP | C   | -2.69          | 0.96            | 0.74           | 0.79           | 1.30            | 0.63            | 0.32            | 1.53             | 1.62             |
| 55 GLU | OE1 | 0.70           | -0.30           | 1.13           | 1.19           | 0.79            | 0.46            | 0.92            | 0.69             | 0.62             | 138 TRP | O   | -1.93          | -0.54           | 0.59           | 1.01           | -0.93           | -0.34           | 0.77            | 1.62             | 0.97             |
| 56 GLU | OE2 | 0.92           | 0.14            | 1.07           | 1.25           | 0.57            | 0.34            | 1.00            | 0.62             | 0.46             | 139 TRP | CB  | 1.79           | -0.39           | 0.57           | -0.74          | 0.04            | 0.16            | -0.14           | 0.51             | 0.30             |
| 57 GLY | N   | 1.74           | 0.44            | -2.42          | -1.60          | 0.42            | 0.62            | 0.07            | -0.26            | -0.26            | 140 TRP | CG  | 1.13           | -0.58           | 1.06           | -0.12          | 0.08            | 0.04            | 0.07            | 1.55             | 1.89             |
| 58 GLY | CA  | 0.88           | -0.05           | -0.05          | -0.58          | 0.00            | -0.02           | -0.44           | -0.15            | -0.12            | 141 TRP | CD1 | 0.29           | -0.72           | -0.80          | -0.48          | -0.39           | -0.83           | -0.43           | -0.12            | 0.04             |
| 59 GLY | C   | -1.82          | -0.02           | 1.35           | 0.38           | 0.21            | -0.39           | -0.16           | 0.16             | 0.41             | 142 TRP | CD2 | 0.94           | -0.99           | -0.51          | 0.64           | -0.27           | -0.07           | 1.16            | 1.59             | 2.27             |
| 60 GLY | O   | -1.34          | -0.45           | 0.77           | 0.98           | -0.38           | -0.33           | 0.41            | 0.90             | 1.01             | 143 TRP | NE1 | 0.75           | -0.40           | -0.13          | -0.23          | -0.49           | -0.86           | -0.66           | -0.79            | -1.00            |
| 61 HIS | N   |                |                 |                |                |                 |                 |                 |                  |                  |         |     |                |                 |                |                |                 |                 |                 |                  |                  |

Table 3. (continued)

|    |         | 57<br>GLY<br>N | 58<br>GLY<br>CA | 59<br>GLY<br>C | 60<br>GLY<br>O |     |         | 57<br>GLY<br>N | 58<br>GLY<br>CA | 59<br>GLY<br>C | 60<br>GLY<br>O |
|----|---------|----------------|-----------------|----------------|----------------|-----|---------|----------------|-----------------|----------------|----------------|
| 0  | SAS SAS | 1.34           | 0.62            | 1.48           | 0.76           | 83  | LEU CB  | 0.30           | -0.41           | -0.23          | -0.71          |
| 1  | ALA N   | 1.33           | 0.33            | -1.65          | -1.62          | 84  | LEU CG  | 0.46           | -0.25           | -0.67          | -0.73          |
| 2  | ALA CA  | 0.25           | -0.42           | -0.24          | -0.66          | 85  | LEU CD1 | 0.43           | -0.43           | -0.65          | 0.07           |
| 3  | ALA C   | -2.17          | 0.19            | 0.40           | 0.70           | 86  | LEU CD2 | 0.58           | -0.30           | -0.52          | 0.12           |
| 4  | ALA O   | -1.79          | -0.71           | 0.28           | 0.67           | 87  | LYS N   | 1.64           | 0.95            | -1.65          | -1.44          |
| 5  | ALA CB  | 0.29           | -0.34           | -0.47          | -0.56          | 88  | LYS CA  | 0.53           | -0.08           | 0.21           | -0.61          |
| 6  | ARG N   | 1.35           | 0.71            | -1.74          | -1.58          | 89  | LYS C   | -2.19          | 0.19            | 1.56           | 1.19           |
| 7  | ARG CA  | 0.33           | -0.30           | -0.11          | -0.90          | 90  | LYS O   | -1.55          | -0.44           | 0.76           | 1.04           |
| 8  | ARG C   | -2.18          | 0.08            | 0.86           | 0.54           | 91  | LYS CB  | 0.69           | -0.09           | -0.05          | -0.55          |
| 9  | ARG O   | -1.68          | -0.66           | 0.41           | 0.52           | 92  | LYS CG  | 0.69           | -0.05           | -0.60          | -0.80          |
| 10 | ARG CB  | 0.57           | -0.31           | -0.50          | -0.78          | 93  | LYS CD  | 0.86           | -0.14           | -0.18          | -0.26          |
| 11 | ARG CG  | 0.48           | -0.27           | -0.74          | -0.93          | 94  | LYS CE  | 0.99           | -0.05           | -0.19          | -0.38          |
| 12 | ARG CD  | 0.54           | -0.23           | -0.33          | -0.63          | 95  | LYS NZ  | 1.07           | 0.23            | 0.42           | -0.42          |
| 13 | ARG NE  | 0.87           | -0.21           | -0.28          | -0.77          | 96  | MET N   | 1.31           | 0.80            | -1.76          | -1.62          |
| 14 | ARG CZ  | 0.61           | -0.77           | -0.61          | 0.00           | 97  | MET CA  | 0.31           | -0.24           | 0.22           | -0.56          |
| 15 | ARG NH1 | 0.50           | -0.36           | -0.48          | -0.64          | 98  | MET C   | -1.85          | -0.41           | 0.97           | 0.17           |
| 16 | ARG NH2 | 0.42           | -0.38           | -0.39          | -0.56          | 99  | MET O   | -1.74          | -0.76           | -0.02          | 0.60           |
| 17 | ASN N   | 1.26           | 0.45            | -1.92          | -1.58          | 100 | MET CB  | 0.35           | -0.44           | -0.12          | -0.65          |
| 18 | ASN CA  | -0.03          | -0.42           | -0.49          | -0.94          | 101 | MET CG  | 0.44           | -0.38           | -0.66          | -0.51          |
| 19 | ASN C   | -1.98          | -0.18           | 0.23           | 0.01           | 102 | MET SD  | 0.03           | -0.75           | -0.88          | 0.38           |
| 20 | ASN O   | -1.64          | -0.78           | 0.12           | 0.63           | 103 | MET CE  | 0.16           | -0.54           | -0.78          | -0.06          |
| 21 | ASN CB  | 0.42           | -0.20           | -0.15          | -0.77          | 104 | PHE N   | 1.25           | 0.56            | -1.71          | -1.83          |
| 22 | ASN CG  | 0.07           | -0.57           | -0.61          | -0.54          | 105 | PHE CA  | 0.37           | -0.39           | -0.12          | -1.01          |
| 23 | ASN OD1 | -0.93          | -0.56           | -0.45          | 0.01           | 106 | PHE C   | -2.29          | 0.13            | -0.12          | 0.45           |
| 24 | ASN ND2 | 0.16           | -0.41           | -0.56          | -0.60          | 107 | PHE O   | -1.75          | -0.71           | 0.03           | 0.50           |
| 25 | ASP N   | 1.27           | 0.43            | -2.04          | -1.48          | 108 | PHE CB  | 0.18           | -0.54           | -0.62          | -0.86          |
| 26 | ASP CA  | -0.05          | -0.44           | -0.34          | -0.62          | 109 | PHE CG  | 0.16           | -0.91           | -0.39          | 0.26           |
| 27 | ASP C   | -2.18          | -0.15           | 0.73           | 0.49           | 110 | PHE CD1 | 0.20           | -0.56           | -1.11          | -0.45          |
| 28 | ASP O   | -1.68          | -0.67           | 0.45           | 0.86           | 111 | PHE CD2 | -0.03          | -0.72           | -1.04          | -0.50          |
| 29 | ASP CB  | 0.13           | -0.13           | -0.05          | -0.34          | 112 | PHE CE1 | -0.10          | -0.66           | -0.99          | -0.12          |
| 30 | ASP CG  | -0.43          | -0.64           | -0.37          | -0.23          | 113 | PHE CE2 | 0.02           | -0.75           | -0.94          | -0.13          |
| 31 | ASP OD1 | -1.19          | -0.44           | -0.01          | 0.47           | 114 | PHE CZ  | 0.09           | -0.75           | -0.88          | 0.21           |
| 32 | ASP OD2 | -0.65          | -0.30           | 0.11           | 0.61           | 115 | PRO N   | 0.70           | -0.09           | -1.00          | -1.59          |
| 33 | CYS N   | 0.79           | 0.43            | -1.77          | -1.67          | 116 | PRO CA  | 0.07           | -0.49           | -0.33          | -0.92          |
| 34 | CYS CA  | 0.31           | -0.46           | -0.74          | -0.91          | 117 | PRO C   | -2.16          | -0.34           | 0.19           | 0.37           |
| 35 | CYS C   | -2.12          | -0.08           | 0.23           | -0.54          | 118 | PRO O   | -1.43          | -0.58           | 0.27           | 0.80           |
| 36 | CYS O   | -1.94          | -0.86           | 0.10           | 0.16           | 119 | PRO CB  | 0.21           | -0.33           | -0.62          | -0.24          |
| 37 | CYS CB  | -0.24          | -0.25           | -0.72          | -0.69          | 120 | PRO CG  | 0.43           | -0.29           | -0.44          | -0.34          |
| 38 | CYS SG  | -0.33          | -0.51           | -0.88          | 0.16           | 121 | PRO CD  | 0.46           | -0.27           | -1.14          | -1.23          |
| 39 | GLN N   | 1.21           | 0.88            | -1.79          | -1.51          | 122 | SER N   | 1.04           | 0.38            | -1.80          | -1.54          |
| 40 | GLN CA  | 0.37           | -0.05           | 0.11           | -0.80          | 123 | SER CA  | -0.07          | -0.50           | -0.19          | -0.87          |
| 41 | GLN C   | -2.28          | 0.06            | 1.25           | 0.65           | 124 | SER C   | -2.28          | -0.27           | 0.72           | 0.41           |
| 42 | GLN O   | -1.62          | -0.61           | 0.72           | 0.93           | 125 | SER O   | -1.69          | -0.75           | 0.02           | 0.43           |
| 43 | GLN CB  | 0.27           | -0.23           | -0.20          | -0.66          | 126 | SER CB  | 0.12           | -0.31           | -0.36          | -0.59          |
| 44 | GLN CG  | 0.41           | -0.11           | -0.48          | -0.73          | 127 | SER OG  | -0.72          | -0.50           | -0.30          | -0.40          |
| 45 | GLN CD  | 0.24           | -0.72           | -0.78          | 0.10           | 128 | THR N   | 0.94           | 0.29            | -1.81          | -1.68          |
| 46 | GLN OE1 | -0.29          | -0.51           | -0.48          | 0.46           | 129 | THR CA  | 0.35           | -0.37           | -0.03          | -0.90          |
| 47 | GLN NE2 | 0.30           | -0.36           | -0.41          | -0.48          | 130 | THR C   | -1.98          | -0.02           | 1.23           | 0.81           |
| 48 | GLU N   | 1.73           | 0.86            | -1.85          | -1.34          | 131 | THR O   | -1.54          | -0.59           | 0.33           | 0.66           |
| 49 | GLU CA  | 0.44           | -0.06           | -0.03          | -0.43          | 132 | THR CB  | -0.02          | -0.40           | -0.41          | -0.83          |
| 50 | GLU C   | -2.41          | -0.07           | 1.35           | 0.77           | 133 | THR OG1 | -0.67          | -0.51           | -0.30          | -0.59          |
| 51 | GLU O   | -1.60          | -0.52           | 0.40           | 0.99           | 134 | THR CG2 | 0.24           | -0.50           | -0.82          | -0.40          |
| 52 | GLU CB  | 0.42           | -0.01           | 0.21           | -0.40          | 135 | TRP N   | 0.96           | 0.56            | -1.49          | -1.67          |
| 53 | GLU CG  | 0.62           | -0.02           | -0.40          | -0.37          | 136 | TRP CA  | 0.47           | -0.25           | 0.11           | -0.99          |
| 54 | GLU CD  | 0.09           | -0.45           | -0.17          | 0.39           | 137 | TRP C   | -2.31          | -0.02           | 2.39           | 0.51           |
| 55 | GLU OE1 | -0.28          | -0.10           | 0.13           | 0.87           | 138 | TRP O   | -1.81          | -0.78           | 0.95           | 0.71           |
| 56 | GLU OE2 | -0.27          | -0.07           | 0.39           | 0.99           | 139 | TRP CB  | 0.66           | -0.23           | -0.68          | -0.62          |
| 57 | GLY N   | 0.80           | 0.10            | -1.59          | -1.42          | 140 | TRP CG  | -0.75          | -0.56           | -1.16          | 0.19           |
| 58 | GLY CA  | 0.11           | -0.31           | -0.51          | -0.68          | 141 | TRP CD1 | -0.20          | -0.61           | -1.40          | -0.90          |
| 59 | GLY C   | -1.57          | -0.52           | -0.31          | -0.03          | 142 | TRP CD2 | -1.19          | -0.96           | -0.57          | 0.94           |
| 60 | GLY O   | -1.42          | -0.67           | -0.04          | 0.33           | 143 | TRP NE1 | -0.21          | -0.70           | -0.90          | -0.82          |
| 61 | HIS N   | 1.62           | 0.37            | -1.78          | -1.48          | 144 | TRP CE2 | -0.88          | -1.27           | -0.57          | 0.85           |
| 62 | HIS CA  | 0.15           | -0.45           | 0.67           | -0.75          | 145 | TRP CE3 | -0.21          | -0.73           | -1.19          | -0.09          |
| 63 | HIS C   | -2.15          | 0.32            | 0.93           | 0.47           | 146 | TRP CZ2 | -0.12          | -0.95           | -1.03          | -0.28          |
| 64 | HIS O   | -1.76          | -0.79           | 0.16           | 0.63           | 147 | TRP CZ3 | -0.25          | -0.81           | -0.84          | -0.20          |
| 65 | HIS CB  | 0.09           | -0.12           | -0.19          | -0.59          | 148 | TRP CH2 | 0.03           | -0.81           | -0.87          | -0.05          |
| 66 | HIS CG  | 0.41           | -0.75           | -0.01          | 0.17           | 149 | TYR N   | 1.06           | 0.52            | -1.75          | -1.60          |
| 67 | HIS ND1 | -0.69          | -0.41           | -0.52          | -0.41          | 150 | TYR CA  | 0.31           | -0.26           | 0.11           | -0.96          |
| 68 | HIS CD2 | -0.08          | -0.37           | -0.94          | -0.61          | 151 | TYR C   | -2.09          | -0.35           | 0.97           | 0.34           |
| 69 | HIS CE1 | 0.08           | -0.57           | -0.69          | -0.39          | 152 | TYR O   | -1.68          | -0.72           | 0.19           | 0.41           |
| 70 | HIS NE2 | 0.16           | -0.37           | -0.65          | -0.50          | 153 | TYR CB  | 0.21           | -0.28           | -0.25          | -0.66          |
| 71 | ILE N   | 1.13           | 0.82            | -1.47          | -1.66          | 154 | TYR CG  | -0.38          | -0.97           | -0.48          | 0.50           |
| 72 | ILE CA  | 0.17           | -0.37           | 0.09           | -1.01          | 155 | TYR CD1 | -0.14          | -0.46           | -1.20          | -0.66          |
| 73 | ILE C   | -2.45          | 0.03            | 0.41           | 0.56           | 156 | TYR CD2 | -0.41          | -0.68           | -1.02          | -0.52          |
| 74 | ILE O   | -1.74          | -0.73           | 0.16           | 0.43           | 157 | TYR CE1 | -0.35          | -0.84           | -1.25          | -0.48          |
| 75 | ILE CB  | 0.27           | -0.37           | -0.29          | -0.77          | 158 | TYR CE2 | -0.24          | -0.88           | -0.90          | -0.24          |
| 76 | ILE CG1 | 0.50           | -0.35           | -0.54          | -0.60          | 159 | TYR CZ  | -0.39          | -1.38           | -0.93          | 0.73           |
| 77 | ILE CG2 | 0.17           | -0.46           | -0.80          | -0.10          | 160 | TYR OH  | -0.21          | -0.73           | -0.67          | -0.13          |
| 78 | ILE CD1 | 0.54           | -0.36           | -0.59          | 0.09           | 161 | VAL N   | 1.14           | 0.76            | -1.70          | -1.71          |
| 79 | LEU N   | 1.60           | 0.90            | -1.71          | -1.68          | 162 | VAL CA  | 0.30           | -0.27           | 0.23           | -0.97          |
| 80 | LEU CA  | 0.37           | -0.15           | 0.39           | -0.79          | 163 | VAL C   | -2.28          | 0.03            | 1.06           | 0.42           |
| 81 | LEU C   | -2.25          | -0.04           | 0.46           | 0.60           | 164 | VAL O   | -1.73          | -0.64           | 0.37           | 0.41           |
| 82 | LEU O   | -1.77          | -0.61           | 0.31           | 0.63           | 165 | VAL CB  | 0.03           | -0.38           | -0.53          | -0.62          |
|    |         |                |                 |                |                | 166 | VAL CG1 | 0.19           | -0.55           | -0.87          | -0.22          |
|    |         |                |                 |                |                | 167 | VAL CG2 | 0.39           | -0.34           | -0.56          | -0.38          |

Potential coefficients are the negative log-odds ratio of the observed contact area frequencies to the expected frequencies, based on a random distribution of contacts.

Favorable (negative) contacts are shaded.

Table 3. (continued)

|        |     | 61<br>HIS<br>N | 62<br>HIS<br>CA | 63<br>HIS<br>C | 64<br>HIS<br>O | 65<br>HIS<br>CB | 66<br>HIS<br>CG | 67<br>HIS<br>ND1 | 68<br>HIS<br>CD2 | 69<br>HIS<br>CE1 | 70<br>HIS<br>NE2 |         |     | 61<br>HIS<br>N | 62<br>HIS<br>CA | 63<br>HIS<br>C | 64<br>HIS<br>O | 65<br>HIS<br>CB | 66<br>HIS<br>CG | 67<br>HIS<br>ND1 | 68<br>HIS<br>CD2 | 69<br>HIS<br>CE1 | 70<br>HIS<br>NE2 |
|--------|-----|----------------|-----------------|----------------|----------------|-----------------|-----------------|------------------|------------------|------------------|------------------|---------|-----|----------------|-----------------|----------------|----------------|-----------------|-----------------|------------------|------------------|------------------|------------------|
| 0 SAS  | SAS | 1.99           | 1.45            | 1.89           | 1.25           | 1.19            | 1.29            | 0.80             | 0.87             | 0.57             | 0.52             | 83 LEU  | CB  | 0.86           | -0.91           | 0.16           | -1.01          | -0.63           | -0.82           | -0.06            | -0.40            | -0.21            | -0.15            |
| 1 ALA  | N   | 1.87           | 0.40            | -2.21          | -1.71          | 0.60            | 0.36            | -0.10            | 0.34             | 0.39             | 0.63             | 84 LEU  | CG  | 0.56           | -0.28           | -0.68          | -1.14          | -0.42           | -0.78           | -0.12            | -0.47            | -0.18            | 0.04             |
| 2 ALA  | CA  | 1.10           | -0.28           | 1.26           | -0.65          | -0.67           | -0.45           | -0.54            | -0.85            | -0.29            | -0.27            | 85 LEU  | CD1 | 0.55           | -0.62           | -0.73          | 0.04           | -0.84           | -1.14           | -0.18            | -0.61            | -0.25            | -0.05            |
| 3 ALA  | C   | -2.48          | 1.00            | 3.14           | 0.89           | 0.31            | 0.78            | 0.02             | -0.80            | -0.34            | 0.06             | 86 LEU  | CD2 | 0.74           | -0.26           | -0.44          | 0.16           | -0.68           | -1.10           | -0.30            | -0.63            | -0.46            | -0.31            |
| 4 ALA  | O   | -1.95          | -0.42           | 0.39           | 0.71           | -0.86           | 0.24            | -0.22            | -0.58            | -0.25            | -0.32            | 87 LYS  | N   | 2.15           | 1.10            | -2.32          | -1.77          | 0.80            | 1.31            | -0.06            | 0.20             | 0.95             | 1.26             |
| 5 ALA  | CB  | 0.63           | -0.67           | -0.34          | -0.55          | -0.33           | -0.65           | -0.20            | -0.33            | -0.25            | 0.02             | 88 LYS  | CA  | 0.91           | -0.08           | 0.45           | -0.54          | -0.58           | -0.81           | -0.15            | -0.56            | 0.00             | 0.29             |
| 6 ARG  | N   | 1.63           | 0.80            | -2.19          | -2.02          | 0.48            | 1.04            | -0.17            | 0.50             | 0.81             | 0.78             | 89 LYS  | C   | -2.44          | 1.63            | 2.11           | 0.54           | 0.09            | 0.69            | 0.03             | -0.41            | 0.18             | 0.11             |
| 7 ARG  | CA  | 0.92           | -0.52           | 0.36           | -0.92          | -0.87           | -0.78           | -0.81            | -0.14            | -0.42            | -0.01            | 90 LYS  | O   | -1.63          | -0.75           | 0.39           | 0.77           | -0.74           | 0.25            | -0.13            | -0.36            | 0.31             | 0.25             |
| 8 ARG  | C   | -2.40          | 0.47            | 1.75           | 0.47           | 0.00            | -0.50           | -0.75            | -0.65            | -0.07            | 0.18             | 91 LYS  | CB  | 1.08           | -0.53           | 0.55           | -0.84          | -0.08           | -0.41           | -0.10            | -0.27            | -0.12            | -0.10            |
| 9 ARG  | O   | -1.72          | -0.77           | 0.81           | 0.46           | -0.85           | 0.62            | -0.11            | -0.40            | -0.08            | -0.06            | 92 LYS  | CG  | 1.30           | -0.32           | -0.50          | -0.50          | 0.16            | -0.27           | -0.02            | -0.11            | -0.26            | 0.06             |
| 10 ARG | CB  | 1.02           | -0.91           | 0.15           | -0.95          | -0.42           | -0.73           | -0.11            | -0.21            | -0.37            | -0.16            | 93 LYS  | CD  | 1.49           | -0.51           | -0.03          | 0.31           | 0.28            | -0.46           | 0.05             | -0.14            | -0.16            | -0.11            |
| 11 ARG | CG  | 0.78           | -0.38           | -0.62          | -0.81          | -0.69           | -0.64           | -0.20            | -0.44            | -0.29            | -0.27            | 94 LYS  | CE  | 1.74           | 0.13            | 0.62           | 0.13           | 0.26            | 0.16            | 0.22             | 0.25             | -0.01            | 0.14             |
| 12 ARG | CD  | 0.99           | -0.63           | -0.11          | -0.42          | -0.28           | -1.13           | -0.51            | -0.37            | -0.52            | -0.42            | 95 LYS  | NZ  | 2.09           | 0.35            | 0.90           | -0.02          | 0.79            | 1.02            | 0.20             | 0.41             | 0.09             | 0.20             |
| 13 ARG | NE  | 0.71           | -0.04           | -0.24          | -0.53          | -0.07           | -0.66           | -0.61            | -0.38            | -0.30            | -0.42            | 96 MET  | N   | 1.45           | 0.65            | -2.57          | -2.19          | 0.14            | 1.03            | 0.39             | 0.15             | 1.01             | 0.81             |
| 14 ARG | CZ  | 2.31           | -0.42           | -0.51          | 0.34           | -0.46           | -1.61           | -0.15            | -0.77            | -0.84            | -0.63            | 97 MET  | CA  | 0.60           | 0.11            | -0.17          | -1.53          | -0.19           | -0.30           | -0.72            | -0.76            | -0.58            | -0.28            |
| 15 ARG | NH1 | 1.16           | -0.31           | -0.21          | -0.29          | -0.08           | -0.44           | -0.27            | -0.26            | -0.38            | -0.30            | 98 MET  | C   | -2.64          | -0.42           | 0.09           | 0.34           | -0.32           | 0.12            | -0.27            | -0.39            | -0.31            | 0.14             |
| 16 ARG | NH2 | 1.10           | -0.36           | 0.13           | -0.39          | -0.02           | -0.26           | -0.10            | -0.21            | -0.31            | -0.25            | 99 MET  | O   | -2.18          | -0.83           | -0.22          | 0.30           | -0.97           | 0.03            | -0.48            | -0.41            | 0.10             | 0.06             |
| 17 ASN | N   | 1.50           | 0.88            | -2.43          | -1.86          | 0.59            | 2.14            | -0.65            | -0.09            | 0.40             | 0.47             | 100 MET | CB  | 0.29           | -1.10           | 0.15           | -1.39          | -0.80           | -0.92           | -1.00            | -0.59            | -0.43            | -0.41            |
| 18 ASN | CA  | 0.59           | -0.36           | 1.14           | -0.58          | -0.40           | 0.33            | -0.55            | -0.49            | -0.83            | -0.59            | 101 MET | CG  | 0.41           | -0.78           | -0.62          | -1.10          | -0.56           | -0.43           | -0.23            | -0.54            | -0.51            | -0.30            |
| 19 ASN | C   | -2.33          | 1.46            | 3.14           | 0.20           | 0.19            | 0.50            | -0.72            | -0.58            | -0.63            | 0.19             | 102 MET | SD  | -0.38          | -1.26           | -0.57          | 0.05           | -0.82           | -0.91           | -0.56            | -1.03            | -0.90            | -0.54            |
| 20 ASN | O   | -1.84          | -0.64           | 1.11           | 0.67           | -0.70           | -0.05           | -0.60            | -0.46            | -0.03            | -0.06            | 103 MET | CE  | 0.33           | -0.87           | -0.56          | -0.26          | -0.65           | -1.33           | -0.68            | -0.82            | -0.59            | -0.47            |
| 21 ASN | CB  | 0.86           | -0.79           | -0.03          | -0.94          | -0.28           | -0.97           | -0.45            | -0.46            | -0.62            | -0.49            | 104 PHE | N   | 2.12           | 0.66            | -2.63          | -2.03          | 0.79            | 1.77            | -0.07            | 0.29             | 0.85             | 0.21             |
| 22 ASN | CG  | 0.28           | -0.41           | 0.72           | -0.57          | -0.81           | -1.00           | -0.73            | -0.89            | -0.92            | -0.27            | 105 PHE | CA  | 0.95           | -0.14           | 0.72           | -0.76          | -0.91           | -0.02           | -0.72            | -0.77            | -0.43            | -0.45            |
| 23 ASN | OD1 | -1.16          | -0.79           | 0.07           | 0.39           | -0.71           | -0.04           | -0.47            | -0.52            | -0.55            | -0.73            | 106 PHE | C   | -2.50          | 0.67            | 2.06           | 0.04           | -0.15           | 0.81            | 0.48             | -0.53            | -0.04            | 0.14             |
| 24 ASN | ND2 | 0.43           | -0.49           | -0.20          | -0.60          | -0.43           | -0.31           | -0.40            | -0.25            | -0.46            | -0.30            | 107 PHE | O   | -2.28          | -1.24           | -0.01          | 0.30           | -1.29           | -0.08           | -0.57            | -0.66            | 0.17             | 0.18             |
| 25 ASP | N   | 1.43           | 1.07            | -2.57          | -1.93          | 0.15            | 1.01            | -0.85            | 0.12             | 0.15             | 0.47             | 108 PHE | CB  | 0.46           | -0.47           | -0.26          | -0.81          | -0.43           | -0.85           | -0.36            | -0.52            | -0.55            | -0.30            |
| 26 ASP | CA  | 0.10           | -0.52           | 0.93           | -0.62          | -0.77           | -0.69           | -0.87            | -0.86            | -0.81            | -0.86            | 109 PHE | CG  | 1.20           | -1.00           | 0.31           | 0.82           | -0.79           | -1.79           | -0.64            | -1.02            | -0.69            | -0.21            |
| 27 ASP | C   | -2.36          | 1.45            | 3.36           | 0.69           | 0.65            | 1.01            | -0.58            | -0.58            | -0.41            | -0.24            | 110 PHE | CD1 | 0.39           | -0.83           | -0.59          | -0.52          | -0.80           | -1.29           | -0.50            | -0.69            | -0.26            | 0.04             |
| 28 ASP | O   | -1.78          | -0.46           | 0.47           | 0.65           | -0.74           | -0.07           | -0.46            | -0.38            | -0.27            | -0.10            | 111 PHE | CD2 | 0.37           | -0.91           | -0.69          | -0.54          | -0.97           | -1.15           | -0.34            | -0.72            | -0.43            | -0.35            |
| 29 ASP | CB  | 0.40           | -0.65           | 0.52           | -0.63          | -0.23           | -0.43           | -0.50            | -0.77            | -0.71            | -0.67            | 112 PHE | CE1 | 0.70           | -0.51           | -0.90          | -0.21          | -1.13           | -1.29           | -0.33            | -0.70            | -0.20            | -0.22            |
| 30 ASP | CG  | -0.40          | -1.07           | 0.31           | -0.55          | -0.95           | -0.51           | -1.04            | -0.89            | -1.05            | -0.65            | 113 PHE | CE2 | 0.34           | -0.93           | -0.71          | 0.04           | -1.06           | -1.24           | -0.44            | -0.90            | -0.48            | -0.18            |
| 31 ASP | OD1 | -1.26          | -0.87           | 0.08           | 0.66           | -0.82           | 0.23            | -1.28            | -0.48            | -0.84            | -1.11            | 114 PHE | CZ  | 0.49           | -0.54           | -0.49          | -0.09          | -0.98           | -1.41           | -0.49            | -0.90            | -0.40            | -0.35            |
| 32 ASP | OD2 | -0.86          | -0.85           | 0.61           | 0.76           | -0.46           | 0.80            | -1.36            | -0.42            | -0.69            | -1.33            | 115 PRO | N   | 2.89           | 2.40            | -1.68          | -1.34          | 0.49            | -0.21           | -0.25            | -0.72            | -0.13            | -0.31            |
| 33 CYS | N   | 1.27           | 0.81            | -2.33          | -1.72          | -0.20           | 0.41            | -0.23            | 0.49             | 0.29             | -0.08            | 116 PRO | CA  | 0.48           | -0.38           | 0.25           | -0.73          | -0.55           | -0.92           | -0.83            | -0.59            | -0.77            | -0.44            |
| 34 CYS | CA  | 0.62           | -0.50           | 0.61           | -1.13          | -0.69           | -0.89           | -0.36            | -0.15            | -0.41            | -0.25            | 117 PRO | C   | -2.89          | 0.13            | 1.80           | -0.07          | 0.22            | 0.73            | -0.27            | -0.64            | -0.41            | -0.23            |
| 35 CYS | C   | -2.43          | -0.56           | 1.92           | -0.43          | -0.09           | 0.07            | 0.62             | 0.17             | 0.75             | -0.84            | 118 PRO | O   | -1.50          | -0.52           | 0.42           | 0.70           | -0.69           | -0.27           | -0.60            | -0.65            | -0.53            | -0.70            |
| 36 CYS | O   | -1.99          | -0.56           | -0.08          | 0.24           | -0.94           | -0.02           | -0.22            | -0.23            | -0.47            | -0.67            | 119 PRO | CB  | 0.28           | 0.19            | 0.05           | -0.12          | -0.20           | -1.08           | -0.45            | -0.50            | -0.75            | -0.54            |
| 37 CYS | CB  | -0.20          | -0.22           | -0.38          | -0.65          | -0.49           | -0.48           | -0.40            | -0.46            | -0.47            | -0.10            | 120 PRO | CG  | 0.75           | -0.30           | -0.04          | -0.04          | -0.40           | -1.07           | -0.27            | -0.51            | -0.59            | -0.35            |
| 38 CYS | SG  | -0.74          | -0.93           | -0.29          | 0.16           | -1.00           | -0.43           | -0.91            | -0.44            | -0.28            | -0.18            | 121 PRO | CD  | 0.99           | -0.22           | -1.63          | -1.03          | -0.29           | -1.01           | -0.02            | -0.47            | -0.51            | -0.36            |
| 39 GLN | N   | 1.77           | 1.07            | -2.43          | -1.67          | 0.76            | 1.14            | 0.23             | 0.42             | 0.59             | 0.89             | 122 SER | N   | 1.56           | 0.30            | -2.16          | -1.78          | 0.24            | 1.38            | -0.47            | 0.39             | 0.47             | 0.05             |
| 40 GLN | CA  | 1.51           | -0.50           | 0.17           | -0.95          | -0.78           | -0.01           | 0.20             | -0.29            | 0.05             | 0.07             | 123 SER | CA  | 1.03           | -0.43           | 0.68           | -0.71          | -0.36           | -0.39           | -0.38            | -0.43            | -0.73            | -0.46            |
| 41 GLN | C   | -2.43          | 0.63            | 4.00           | 1.74           | 0.25            | -0.55           | 0.10             | -0.48            | -0.28            | 0.01             | 124 SER | C   | -2.40          | 0.69            | 2.94           | 0.85           | -0.23           | 0.57            | -0.39            | -0.65            | -0.38            | -0.01            |
| 42 GLN | O   | -1.79          | 0.86            | 0.52           | 0.66           | -0.89           | -0.15           | -0.45            | -0.37            | 0.00             | 0.00             | 125 SER | O   | -1.83          | -0.76           | -0.12          | 0.37           | -0.77           | 0.20            | -0.29            | -0.44            | -0.53            | -0.33            |
| 43 GLN | CB  | 0.79           | -0.56           | 0.14           | -0.79          | 0.04            | -0.22           | -0.12            | -0.48            | -0.40            | -0.50            | 126 SER | CB  | 0.39           | -0.56           | 0.21           | -0.52          | -0.09           | -0.39           | -0.58            | -0.36            | -0.70            | -0.65            |
| 44 GLN | CG  | 0.98           | -0.33           | -0.05          | -0.58          | -0.05           | -0.15           | 0.00             | -0.10            | -0.29            | -0.22            | 127 SER | OG  | -0.70          | -0.82           | 0.02           | -0.38          | -0.58           | 0.09            | -1.03            | -0.47            | -0.51            | -0.96            |
| 45 GLN | CD  | 0.24           | -0.10           | 0.38           | 0.33           | -0.55           | -1.66           | -0.18            | -0.67            | -0.84            | -0.42            | 128 THR | N   | 1.71           | 0.31            | -2.47          | -1.97          | 0.50            | 1.54            | -0.32            | 0.14             | 0.59             | 0.69             |
| 46 GLN | OE1 | -0.15          | -0.93           | 0.11           | 0.35           | -0.07           | -0.26           | -0.53            | -0.43            | -0.51            | -0.79            | 129 THR | CA  | 0.75           | -0.79           | 1.78           | -0.99          | -0.60           | -0.69           | -0.55            | -0.40            | -0.25            | -0.42            |
| 47 GLN | NE2 | 0.53           | -0.40           | 0.20           | -0.22          | 0.14            | -0.21           | -0.13            | -0.09            | -0.23            | 0.06             | 130 THR | C   | -2.33          | 0.89            | 3.48           | 0.51           | -0.11           | -0.76           | -0.55            | -1.04            | 0.03             | 0.04             |
| 48 GLU | N   | 1.64           | 0.88            | -2.57          | -1.95          | 0.40            | 0.86            | 0.01             | 0.27             | 0.31             | 1.03             | 131 THR | O   | -1.91          | -1.20           | 1.35           | 0.64           | -0.85           | -0.26           | -0.44            | -0.46            | -0.12            | -0.12            |
| 49 GLU | CA  | 0.66           | 0.02            | 0.45           | -0.70          | -0.83           | -1.34           | -0.30            | -0.61            | -0.32            | 0.01             | 132 THR | CB  | 0.52           | -0.67           | -0.06          | -0.90          | -0.63           | -0.49           | -0.48            | -0.40            | -0.64            | -0.49            |
| 50 GLU | C   | -2.47          | 1.25            | 4.00           | 0.81           | 0.98            | 0.12            | -0.24            | -0.41            | -0.30            | 0.26             | 133 THR | OG1 | -0.55          | -1.08           | 0.03           | -0.54          | -0.67           | -0.54           | -1.08            | -0.55            | -0.46            | -0.74            |
| 51 GLU | O   | -1.82          | -0.47           | 0.69           | 0.88           | -0.81           | -0.08           | -0.40            | -0.67            | -0.14            | -0.05            | 134 THR | CG2 | 0.50           | -0.26           | -0.35          | -0.27          | -0.34           | -0.58           | -0.32            | -0.50            | -0.58            | -0.36            |
| 52 GLU | CB  | 0.60           | -0.74           | 0.34           | -0.99          | -0.20           | -0.51           | -0.19            | -0.48            | -0.57            | -0.50            | 135 TRP | N   | 2.58           | 0.95            | -2.62          | -2.05          | 0.49            | 1.04            | -0.32            | 0.84             | 1.02             | 0.72             |
| 53 GLU | CG  | 0.62           | -0.15           | -0.31          | -0.63          | -0.14           | -0.10           | -0.13            | -0.51            | -0.55            | -0.63            | 136 TRP | CA  | 1.63           | -0.05           | 3.00           | -1.19          | -0.73           | -0.83           | -0.66            | -0.52            | -0.67            | -0.39            |
| 54 GLU | CD  | 0.47           | -1.07           | -0.52          | 0.09           | -0.91           | 0.03            | -0.78            | -0.41            | -0.83            | -1.01            | 137 TRP | C   | -2.83          | 2.68            | 3.05           | 2.09           | 0.35            | 3.34            | 1.01             | 0.20             | 0.66             | -0.04            |
| 55 GLU | OE1 | -0.06          | -0.84           | 0.16           | 0.89           | -0.24           | 0.52            | -0.95            | -0.38            | -0.83            | -1.29            | 138 TRP | O   | -2.14          | -0.64           | 0.03           | 0.63           | -0.97           | 1.09            | -0.72            |                  |                  |                  |

Table 3. (continued)

|        |     | 71<br>ILE<br>N | 72<br>ILE<br>CA | 73<br>ILE<br>C | 74<br>ILE<br>O | 75<br>ILE<br>CB | 76<br>ILE<br>CG1 | 77<br>ILE<br>CG2 | 78<br>ILE<br>CD1 |         |     | 71<br>ILE<br>N | 72<br>ILE<br>CA | 73<br>ILE<br>C | 74<br>ILE<br>O | 75<br>ILE<br>CB | 76<br>ILE<br>CG1 | 77<br>ILE<br>CG2 | 78<br>ILE<br>CD1 |
|--------|-----|----------------|-----------------|----------------|----------------|-----------------|------------------|------------------|------------------|---------|-----|----------------|-----------------|----------------|----------------|-----------------|------------------|------------------|------------------|
| 0 SAS  | SAS | 2.48           | 2.14            | 2.40           | 1.61           | 2.12            | 1.89             | 1.61             | 1.62             | 83 LEU  | CB  | 1.10           | -1.40           | 0.59           | -1.18          | -1.04           | -1.16            | -0.96            | -1.15            |
| 1 ALA  | N   | 1.35           | 0.61            | -2.70          | -1.97          | 0.86            | 0.52             | 0.03             | 0.20             | 84 LEU  | CG  | 0.98           | -0.52           | -0.44          | -1.56          | -0.42           | -1.00            | -1.24            | -1.19            |
| 2 ALA  | CA  | 1.02           | -0.62           | 0.60           | -0.72          | -1.24           | -0.79            | -0.67            | -1.14            | 85 LEU  | CD1 | 0.47           | -1.00           | -0.77          | -0.05          | -0.77           | -1.18            | -1.42            | -1.37            |
| 3 ALA  | C   | -2.29          | 1.79            | 3.20           | 0.67           | 0.20            | -0.52            | -0.59            | -0.96            | 86 LEU  | CD2 | 0.73           | -0.91           | -0.43          | 0.08           | -0.87           | -1.14            | -1.36            | -1.45            |
| 4 ALA  | O   | -2.02          | -1.15           | 0.98           | 0.43           | -1.37           | -0.77            | -0.06            | -0.08            | 87 LYS  | N   | 1.80           | 1.78            | -2.85          | -1.87          | 1.64            | 0.88             | 0.43             | 0.80             |
| 5 ALA  | CB  | 0.73           | -0.92           | -0.17          | -0.69          | -0.49           | -0.87            | -0.91            | -0.96            | 88 LYS  | CA  | 0.94           | -0.29           | 0.96           | -1.03          | -1.22           | -0.29            | -0.18            | -0.77            |
| 6 ARG  | N   | 1.80           | 1.26            | -2.78          | -1.94          | 0.98            | 0.66             | 0.62             | 0.69             | 89 LYS  | C   | -2.55          | 1.77            | 3.32           | 0.77           | 0.30            | -0.51            | -0.46            | -0.56            |
| 7 ARG  | CA  | 0.97           | -0.47           | 0.74           | -1.04          | -1.18           | -0.74            | -0.23            | -0.92            | 90 LYS  | O   | -1.83          | -0.98           | 0.87           | 0.55           | -1.11           | -0.54            | 0.11             | 0.18             |
| 8 ARG  | C   | -2.22          | 0.55            | 1.26           | 0.75           | 0.60            | -0.59            | -0.40            | -0.69            | 91 LYS  | CB  | 1.40           | -0.59           | 0.40           | -0.71          | -0.14           | -0.40            | -0.33            | -0.41            |
| 9 ARG  | O   | -2.04          | -1.15           | 0.90           | 0.39           | -1.31           | -0.78            | 0.02             | 0.19             | 92 LYS  | CG  | 1.37           | 0.25            | -0.12          | -0.55          | 0.27            | -0.25            | -0.41            | -0.39            |
| 10 ARG | CB  | 1.72           | -0.78           | 0.41           | -0.90          | -0.30           | -0.48            | -0.29            | -0.49            | 93 LYS  | CD  | 1.79           | -0.29           | -0.05          | 0.12           | 0.34            | 0.13             | -0.33            | -0.14            |
| 11 ARG | CG  | 1.13           | -0.27           | -0.59          | -0.76          | -0.29           | -0.47            | -0.63            | -0.58            | 94 LYS  | CE  | 1.77           | 0.43            | 0.70           | 0.17           | 0.57            | 0.47             | -0.19            | 0.27             |
| 12 ARG | CD  | 1.39           | -0.38           | -0.20          | -0.19          | 0.01            | 0.10             | -0.36            | -0.43            | 95 LYS  | NZ  | 1.77           | 0.90            | 0.87           | 0.05           | 1.56            | 1.45             | 0.99             | 1.28             |
| 13 ARG | NE  | 1.62           | 0.13            | 0.56           | -0.29          | 0.41            | 0.15             | -0.27            | -0.20            | 96 MET  | N   | 1.63           | 0.72            | -2.14          | -2.19          | 1.05            | 0.71             | 0.13             | 0.50             |
| 14 ARG | CZ  | 2.07           | -0.32           | 0.00           | 1.06           | -0.10           | -0.72            | -0.90            | -0.91            | 97 MET  | CA  | 0.49           | -0.83           | 1.25           | -1.29          | -1.62           | -0.64            | -0.79            | -1.09            |
| 15 ARG | NH1 | 0.98           | -0.07           | 0.20           | -0.04          | 0.28            | 0.15             | -0.05            | 0.14             | 98 MET  | C   | -2.12          | 1.47            | 4.00           | 0.76           | 0.03            | -0.51            | -0.62            | -0.75            |
| 16 ARG | NH2 | 1.28           | 0.19            | 0.44           | 0.01           | 0.41            | 0.27             | -0.01            | 0.08             | 99 MET  | O   | -2.32          | -1.42           | 0.86           | 0.36           | -1.49           | -1.02            | -0.36            | -0.23            |
| 17 ASN | N   | 2.03           | 1.75            | -2.84          | -1.85          | 0.80            | 1.04             | 0.37             | 0.86             | 100 MET | CB  | 0.83           | -1.30           | 0.23           | -1.11          | -0.94           | -0.99            | -0.93            | -0.86            |
| 18 ASN | CA  | 1.04           | -0.13           | 1.05           | -1.00          | -1.08           | -0.34            | -0.18            | -0.41            | 101 MET | CG  | 0.63           | -0.57           | -0.64          | -1.13          | -0.79           | -0.95            | -1.17            | -1.00            |
| 19 ASN | C   | -2.37          | 1.37            | 1.58           | 0.02           | 0.51            | -0.33            | -0.37            | -0.66            | 102 MET | SD  | 0.39           | -1.14           | -0.64          | 0.59           | -0.73           | -1.17            | -1.33            | -1.22            |
| 20 ASN | O   | -1.78          | -0.68           | 0.48           | 0.49           | -0.93           | -0.66            | 0.08             | 0.21             | 103 MET | CE  | 0.23           | -0.85           | -1.03          | -0.07          | -0.67           | -0.91            | -1.19            | -1.04            |
| 21 ASN | CB  | 1.15           | -0.29           | -0.04          | -0.71          | 0.30            | -0.13            | -0.28            | -0.29            | 104 PHE | N   | 1.87           | 0.84            | -2.26          | -2.35          | 1.40            | 0.70             | 0.21             | 0.53             |
| 22 ASN | CG  | 0.58           | 0.53            | 0.21           | -0.44          | -0.11           | -0.62            | -0.43            | -0.36            | 105 PHE | CA  | 0.78           | -0.30           | 1.62           | -1.24          | -1.25           | -0.63            | -0.44            | -0.89            |
| 23 ASN | OD1 | -0.64          | -0.21           | 0.50           | 0.32           | -0.13           | 0.16             | 0.10             | 0.30             | 106 PHE | C   | -1.81          | 1.23            | 2.59           | 0.77           | 1.00            | -0.78            | -0.31            | -0.71            |
| 24 ASN | ND2 | 0.40           | -0.02           | -0.09          | -0.40          | 0.08            | 0.34             | -0.10            | 0.28             | 107 PHE | O   | -2.42          | -1.44           | 0.98           | 0.11           | -1.43           | -0.94            | -0.16            | -0.03            |
| 25 ASP | N   | 1.67           | 1.67            | -2.97          | -1.77          | 0.59            | 0.74             | 0.53             | 1.06             | 108 PHE | CB  | 0.64           | -0.92           | 0.05           | -1.00          | -1.02           | -1.10            | -1.00            | -1.14            |
| 26 ASP | CA  | 1.34           | 0.40            | 0.57           | -0.60          | -1.31           | -0.29            | -0.01            | -0.41            | 109 PHE | CG  | 2.15           | -0.47           | 0.14           | 0.02           | -0.61           | -1.33            | -1.31            | -1.59            |
| 27 ASP | C   | -2.44          | 2.01            | 1.28           | 0.33           | 0.78            | -0.16            | -0.15            | -0.64            | 110 PHE | CD1 | 0.74           | -0.80           | -0.83          | -0.75          | -0.85           | -1.03            | -1.16            | -1.14            |
| 28 ASP | O   | -1.78          | -0.56           | 1.48           | 0.64           | -1.11           | -0.64            | 0.26             | 0.33             | 111 PHE | CD2 | 0.57           | -0.87           | -0.69          | -0.60          | -0.66           | -1.17            | -1.21            | -1.27            |
| 29 ASP | CB  | 1.00           | -0.31           | 0.58           | -0.59          | -0.25           | -0.10            | -0.45            | -0.33            | 112 PHE | CE1 | 0.34           | -0.68           | -0.73          | 0.02           | -0.92           | -1.08            | -1.21            | -1.16            |
| 30 ASP | CG  | 1.09           | 0.72            | 1.25           | 0.05           | -0.40           | 0.14             | -0.16            | -0.04            | 113 PHE | CE2 | 0.75           | -0.69           | -0.46          | 0.09           | -0.67           | -1.21            | -1.24            | -1.26            |
| 31 ASP | OD1 | 0.05           | 0.49            | 0.89           | 1.08           | 0.30            | 0.85             | 0.89             | 0.70             | 114 PHE | CZ  | 0.30           | -0.68           | -0.68          | 0.12           | -0.66           | -0.93            | -1.25            | -1.26            |
| 32 ASP | OD2 | 0.14           | -0.04           | 1.48           | 1.23           | 0.25            | 0.79             | 0.50             | 0.66             | 115 PRO | N   | 2.71           | 1.68            | -1.87          | -1.17          | 0.97            | -0.06            | -0.51            | -0.29            |
| 33 CYS | N   | 1.26           | 0.26            | -2.33          | -2.15          | 1.65            | 0.35             | 0.22             | 0.19             | 116 PRO | CA  | 1.30           | -0.35           | 0.71           | -0.72          | -0.84           | -0.43            | -0.40            | -0.60            |
| 34 CYS | CA  | 0.43           | -0.64           | 0.39           | -1.24          | -1.24           | -0.26            | -0.42            | -0.83            | 117 PRO | C   | -2.31          | 1.46            | 1.50           | 0.90           | 0.77            | -0.26            | -0.13            | -0.66            |
| 35 CYS | C   | -2.11          | 1.02            | 4.00           | 0.40           | -0.08           | -0.83            | -0.61            | -0.87            | 118 PRO | O   | -1.80          | -0.48           | 1.06           | 0.80           | -1.23           | -0.80            | 0.07             | -0.07            |
| 36 CYS | O   | -2.05          | -1.54           | 0.71           | 0.13           | -1.06           | -0.91            | 0.05             | 0.07             | 119 PRO | CB  | 0.82           | -0.03           | -0.25          | 0.20           | 0.25            | -0.48            | -0.45            | -0.52            |
| 37 CYS | CB  | 0.81           | -0.69           | 0.32           | -0.87          | -0.74           | -1.02            | -0.65            | -0.82            | 120 PRO | CG  | 0.94           | -0.26           | 0.06           | 0.21           | 0.27            | -0.44            | -0.40            | -0.41            |
| 38 CYS | SG  | -0.07          | -0.93           | -1.07          | -0.25          | -0.68           | -1.01            | -0.90            | -0.75            | 121 PRO | CD  | 0.98           | -0.27           | -1.63          | -0.91          | 0.49            | -0.07            | -0.08            | -0.19            |
| 39 GLN | N   | 1.81           | 1.01            | -3.03          | -1.78          | 1.18            | 0.85             | 0.63             | 0.67             | 122 SER | N   | 1.78           | 1.59            | -2.69          | -1.82          | 0.54            | 0.67             | 0.26             | 0.51             |
| 40 GLN | CA  | 0.91           | -0.33           | 0.05           | -0.96          | -1.43           | -0.27            | -0.14            | -0.81            | 123 SER | CA  | 0.85           | 0.08            | 1.00           | -0.92          | -0.79           | -0.53            | -0.22            | -0.69            |
| 41 GLN | C   | -2.72          | 1.05            | 2.00           | 0.80           | 0.09            | -0.46            | -0.53            | -0.83            | 124 SER | C   | -2.45          | 1.37            | 1.25           | 0.74           | 0.04            | -0.49            | -0.50            | -0.58            |
| 42 GLN | O   | -1.98          | -1.11           | 0.76           | 0.67           | -1.26           | -0.79            | 0.13             | 0.25             | 125 SER | O   | -1.80          | -0.98           | 0.94           | 0.35           | -1.00           | -0.58            | 0.00             | 0.24             |
| 43 GLN | CB  | 1.53           | -0.84           | 0.52           | -0.69          | -0.56           | -0.24            | -0.37            | -0.53            | 126 SER | CB  | 0.90           | -0.59           | 0.20           | -0.57          | -0.44           | -0.27            | -0.42            | -0.41            |
| 44 GLN | CG  | 1.25           | -0.13           | -0.24          | -0.63          | 0.16            | -0.10            | -0.28            | -0.31            | 127 SER | OG  | -0.25          | -0.52           | 0.43           | -0.36          | -0.22           | 0.12             | -0.02            | 0.23             |
| 45 GLN | CD  | 1.55           | -0.67           | 0.38           | 0.75           | -0.33           | 0.34             | -0.88            | -0.59            | 128 THR | N   | 1.29           | 1.27            | -2.60          | -2.06          | 0.80            | 0.77             | 0.52             | 0.70             |
| 46 GLN | OE1 | -0.01          | -0.60           | 0.51           | 0.77           | -0.14           | 0.31             | 0.06             | 0.10             | 129 THR | CA  | 0.86           | -0.84           | 1.47           | -1.31          | -1.15           | -0.60            | -0.37            | -0.92            |
| 47 GLN | NE2 | 0.73           | -0.23           | 0.35           | -0.09          | -0.09           | 0.29             | -0.13            | 0.13             | 130 THR | C   | -2.12          | 1.35            | 1.89           | 0.88           | 0.73            | -0.61            | -0.32            | -0.86            |
| 48 GLU | N   | 1.91           | 1.70            | -3.02          | -1.80          | 1.41            | 1.05             | 0.48             | 0.89             | 131 THR | O   | -2.18          | -1.37           | 1.19           | 0.37           | -1.24           | -0.90            | -0.07            | 0.11             |
| 49 GLU | CA  | 1.04           | 0.22            | 0.45           | -0.97          | -1.36           | -0.32            | -0.34            | -0.84            | 132 THR | CB  | 0.75           | -1.07           | -0.33          | -0.90          | -0.78           | -0.61            | -0.48            | -0.45            |
| 50 GLU | C   | -2.59          | 1.86            | 2.17           | 1.38           | 0.98            | -0.35            | -0.25            | -0.49            | 133 THR | OG1 | 0.03           | -0.52           | 0.25           | -0.46          | -0.30           | -0.13            | -0.27            | 0.08             |
| 51 GLU | O   | -1.83          | -0.71           | 2.20           | 0.81           | -1.20           | -0.61            | 0.30             | 0.31             | 134 THR | CG2 | 0.44           | -0.35           | -0.57          | -0.23          | -0.43           | -0.82            | -0.80            | -0.80            |
| 52 GLU | CB  | 1.36           | -0.80           | 0.69           | -0.70          | -0.24           | -0.17            | -0.24            | -0.24            | 135 TRP | N   | 1.62           | 1.23            | -2.52          | -2.11          | 1.10            | 1.03             | 0.28             | 0.54             |
| 53 GLU | CG  | 1.05           | -0.02           | -0.10          | -0.45          | 0.16            | -0.23            | -0.34            | -0.36            | 136 TRP | CA  | 0.78           | -0.65           | 3.76           | -1.49          | -1.51           | -0.86            | -0.09            | -0.61            |
| 54 GLU | CD  | 1.76           | -0.23           | 1.41           | 0.87           | 0.13            | -0.13            | -0.45            | -0.38            | 137 TRP | C   | -2.18          | 1.34            | 4.00           | 1.12           | 1.02            | -0.97            | -0.75            | -0.74            |
| 55 GLU | OE1 | 0.74           | -0.21           | 1.53           | 1.46           | 0.58            | 0.75             | 0.47             | 0.62             | 138 TRP | O   | -2.17          | -1.23           | 0.86           | 0.43           | -1.00           | -0.67            | -0.07            | 0.17             |
| 56 GLU | OE2 | 0.56           | 0.51            | 0.93           | 1.37           | 0.61            | 0.75             | 0.49             | 0.56             | 139 TRP | CB  | 0.98           | -0.79           | 0.36           | -0.81          | -1.05           | -0.91            | -0.85            | -1.04            |
| 57 GLY | N   | 1.15           | 0.16            | -2.47          | -1.75          | 0.26            | 0.49             | 0.15             | 0.52             | 140 TRP | CG  | 1.57           | 0.71            | 2.17           | 0.32           | -1.30           | -0.99            | -1.19            | -1.25            |
| 58 GLY | CA  | 0.86           | -0.34           | 0.02           | -0.75          | -0.35           | -0.34            | -0.46            | -0.35            | 141 TRP | CD1 | 0.36           | -0.44           | -0.78          | -0.47          | -0.80           | -0.63            | -0.72            | -0.48            |
| 59 GLY | C   | -1.43          | 0.11            | 0.41           | 0.14           | -0.30           | -0.54            | -0.81            | -0.60            | 142 TRP | CD2 | 1.44           | 0.60            | 1.57           | 1.28           | -0.83           | -1.02            | -1.23            | -1.20            |
| 60 GLY | O   | -1.67          | -1.05           | 0.58           | 0.40           | -0.79           | -0.60            | -0.08            | 0.12             | 143 TRP | NE1 | 0.56           | -0.16           | 0.27           | -0.31          | -0.56           | -0.02            | -0.54            | -0.37            |
| 61 HIS | N   | 1.77           | 1.58            | -2.81          | -2.11          | 0.80            | 0.72             | 0.29             | 0.40             | 144 TRP | CE2 | 0.98           | -0.10           | 0.42           | 1.75           | -0.70           | -0.80            | -1.19            | -1.15            |
| 62 HIS | CA  | 1.16           | -0.18           | 0.03           | -1.05          | -1.03           | -0.67            | -0.33            | -0.71            | 145 TRP | CE3 | 0.02           | -0.61           | -1.82          | 0.03           | -1.00           | -1.10            | -1.19            | -1.26            |
| 63 HIS | C   | -2.22          | -0.04           | 2.24           | 0.51           | 1.54            | -0.50            | -0.28            | -0.62            | 146 TRP | CZ2 | 0.62           | -0.62           | -0.66          | 0.15           | -0.65           | -0.80            | -0.89            | -0.98            |
| 64 HIS | O   | -1.94          | -1.17           | 0.46           | 0.23           | -1.05           | -0.68            | -0.01            | 0.20             | 147 TRP | CZ3 | -0.08          | -0.76           | -1.39          | -0.30          | -0.75           | -1.18            | -1.20            | -1.26            |
| 65 HIS | CB  | 0.81           | -0.81           | 0.45           | -1.03          | -0.59           | -0.72            | -0.75            | -0.64            | 148 TRP | CH2 | 0.28           | -0.96           | -1.10          | 0.09           | -0.87           | -1.13            | -1.10            | -1.24            |
| 66 HIS | CG  | 1.80           | 0.12            | 1.76           | 0.01           | -1.09           | -0.92            | -1.02            | -1.08            | 149 TYR | N   | 1.21           | 0.48            | -2.49          | -2.25          | 0.91            | 0.64             | 0.01             | 0.48             |
| 67 HIS | ND1 | 0.36           | 0.12            | 0.23           | -0.43          | -0.10           | 0.01             |                  |                  |         |     |                |                 |                |                |                 |                  |                  |                  |

Table 3. (continued)

|        |     | 79<br>LEU<br>N | 80<br>LEU<br>CA | 81<br>LEU<br>C | 82<br>LEU<br>O | 83<br>LEU<br>CB | 84<br>LEU<br>CG | 85<br>LEU<br>CD1 | 86<br>LEU<br>CD2 |         |     | 79<br>LEU<br>N | 80<br>LEU<br>CA | 81<br>LEU<br>C | 82<br>LEU<br>O | 83<br>LEU<br>CB | 84<br>LEU<br>CG | 85<br>LEU<br>CD1 | 86<br>LEU<br>CD2 |
|--------|-----|----------------|-----------------|----------------|----------------|-----------------|-----------------|------------------|------------------|---------|-----|----------------|-----------------|----------------|----------------|-----------------|-----------------|------------------|------------------|
| 0 SAS  | SAS | 2.30           | 2.24            | 2.12           | 1.38           | 1.89            | 2.12            | 1.51             | 1.34             | 83 LEU  | CB  | 0.85           | -1.47           | 0.02           | -1.24          | -0.81           | -0.87           | -1.02            | -0.96            |
| 1 ALA  | N   | 1.81           | 0.87            | -2.49          | -1.93          | 0.68            | 0.61            | 0.14             | 0.39             | 84 LEU  | CG  | 0.69           | -0.78           | -0.63          | -1.37          | -0.88           | -1.05           | -1.24            | -0.98            |
| 2 ALA  | CA  | 0.94           | -0.29           | 0.56           | -0.59          | -1.07           | -0.69           | -1.11            | -0.82            | 85 LEU  | CD1 | 0.38           | -1.11           | -0.88          | -0.13          | -1.01           | -1.22           | -1.27            | -1.35            |
| 3 ALA  | C   | -2.43          | 1.62            | 1.05           | 0.78           | 0.18            | -0.50           | -1.00            | -0.68            | 86 LEU  | CD2 | 0.67           | -0.73           | -0.47          | 0.04           | -0.95           | -0.97           | -1.35            | -1.35            |
| 4 ALA  | O   | -2.11          | -0.88           | 0.81           | 0.62           | -1.20           | -1.16           | -0.16            | 0.04             | 87 LYS  | N   | 2.14           | 1.11            | -2.77          | -1.91          | 1.06            | 0.84            | 0.59             | 0.80             |
| 5 ALA  | CB  | 0.78           | -1.08           | -0.33          | -0.72          | -0.65           | -0.66           | -0.88            | -0.93            | 88 LYS  | CA  | 1.05           | 0.23            | 1.00           | -0.78          | -0.93           | -0.40           | -0.86            | -0.54            |
| 6 ARG  | N   | 2.20           | 1.30            | -2.57          | -1.96          | 0.67            | 0.72            | 0.49             | 0.69             | 89 LYS  | C   | -2.72          | 1.11            | 2.46           | 0.86           | 0.32            | -0.62           | -0.60            | -0.62            |
| 7 ARG  | CA  | 0.80           | -0.06           | 0.76           | -0.68          | -1.08           | -0.31           | -0.96            | -0.68            | 90 LYS  | O   | -1.88          | -0.84           | 0.93           | 0.70           | -0.87           | -1.03           | 0.27             | 0.33             |
| 8 ARG  | C   | -2.54          | 1.52            | 1.87           | 0.70           | 0.26            | -0.42           | -0.71            | -0.61            | 91 LYS  | CB  | 1.67           | -1.03           | 0.33           | -0.91          | -0.13           | -0.21           | -0.41            | -0.42            |
| 9 ARG  | O   | -2.04          | -1.07           | 0.85           | 0.53           | -1.12           | -1.11           | 0.14             | 0.32             | 92 LYS  | CG  | 1.62           | -0.42           | -0.31          | -0.69          | -0.05           | -0.12           | -0.47            | -0.40            |
| 10 ARG | CB  | 1.36           | -1.10           | 0.15           | -1.06          | -0.26           | -0.27           | -0.50            | -0.48            | 93 LYS  | CD  | 1.68           | -0.64           | -0.13          | -0.07          | 0.22            | 0.09            | -0.13            | -0.29            |
| 11 ARG | CG  | 1.24           | -0.48           | -0.34          | -0.63          | -0.42           | -0.29           | -0.59            | -0.56            | 94 LYS  | CE  | 1.42           | 0.12            | 0.24           | -0.07          | 0.40            | 0.30            | 0.14             | 0.04             |
| 12 ARG | CD  | 1.30           | -0.38           | -0.12          | -0.33          | 0.04            | -0.02           | -0.20            | -0.34            | 95 LYS  | NZ  | 1.90           | 0.84            | 0.96           | 0.01           | 1.52            | 1.58            | 1.23             | 0.89             |
| 13 ARG | NE  | 1.78           | -0.11           | 0.29           | -0.52          | 0.12            | 0.10            | -0.28            | -0.15            | 96 MET  | N   | 1.81           | 1.37            | -2.22          | -2.12          | 1.45            | 0.64            | 0.48             | 0.66             |
| 14 ARG | CZ  | 2.28           | -0.41           | -0.35          | 0.48           | -0.57           | -0.70           | -0.83            | -0.95            | 97 MET  | CA  | 0.82           | -0.17           | 1.51           | -0.91          | -1.27           | -0.41           | -1.14            | -0.81            |
| 15 ARG | NH1 | 0.98           | -0.34           | -0.25          | -0.28          | 0.10            | 0.23            | 0.09             | -0.09            | 98 MET  | C   | -2.09          | 2.48            | 3.03           | 0.50           | -0.03           | -0.41           | -1.03            | -0.57            |
| 16 ARG | NH2 | 1.12           | -0.23           | 0.02           | -0.16          | 0.04            | 0.33            | 0.06             | -0.07            | 99 MET  | O   | -2.26          | -0.97           | 0.67           | 0.52           | -1.21           | -1.39           | -0.16            | 0.05             |
| 17 ASN | N   | 2.12           | 1.24            | -2.64          | -1.73          | 1.06            | 0.53            | 0.72             | 0.78             | 100 MET | CB  | 1.31           | -1.30           | 0.36           | -1.11          | -0.71           | -0.71           | -1.02            | -0.90            |
| 18 ASN | CA  | 1.23           | -0.03           | 0.84           | -0.67          | -0.78           | -0.33           | -0.67            | -0.50            | 101 MET | CG  | 0.61           | -0.80           | -0.66          | -0.97          | -0.84           | -0.94           | -1.05            | -0.95            |
| 19 ASN | C   | -2.29          | 0.72            | 1.71           | 0.34           | 0.69            | -0.33           | -0.65            | -0.32            | 102 MET | SD  | 0.29           | -1.31           | -0.71          | 0.37           | -1.05           | -1.14           | -1.20            | -1.31            |
| 20 ASN | O   | -1.81          | -0.82           | 0.32           | 0.55           | -0.91           | -0.83           | 0.23             | 0.34             | 103 MET | CE  | 0.38           | -0.96           | -0.85          | -0.12          | -0.92           | -0.89           | -1.08            | -1.14            |
| 21 ASN | CB  | 1.43           | -0.67           | 0.26           | -0.66          | -0.07           | -0.16           | -0.35            | -0.32            | 104 PHE | N   | 1.86           | 1.47            | -2.29          | -2.21          | 0.97            | 0.83            | 0.49             | 0.75             |
| 22 ASN | CG  | 0.74           | 0.54            | 0.46           | -0.20          | -0.68           | -0.52           | -0.45            | -0.55            | 105 PHE | CA  | 0.78           | -0.77           | 1.62           | -0.99          | -1.14           | -0.71           | -0.83            | -0.61            |
| 23 ASN | CD1 | -0.71          | -0.35           | 0.33           | 0.56           | -0.27           | 0.08            | 0.24             | 0.34             | 106 PHE | C   | -2.04          | 1.81            | 2.15           | 0.10           | 0.39            | -0.50           | -0.77            | -0.44            |
| 24 ASN | ND2 | 0.80           | -0.22           | 0.06           | -0.29          | 0.02            | 0.11            | 0.23             | 0.24             | 107 PHE | O   | -2.24          | -1.18           | 0.65           | 0.37           | -1.20           | -1.28           | 0.09             | 0.22             |
| 25 ASP | N   | 1.84           | 1.17            | -2.65          | -1.52          | 0.65            | 0.63            | 0.77             | 0.99             | 108 PHE | CB  | 0.81           | -1.23           | -0.17          | -1.06          | -0.86           | -0.67           | -1.07            | -0.99            |
| 26 ASP | CA  | 1.24           | 0.36            | 1.73           | -0.34          | -0.79           | -0.28           | -0.58            | -0.30            | 109 PHE | CG  | 1.96           | -0.69           | 0.18           | 0.10           | -1.09           | -0.68           | -1.55            | -1.46            |
| 27 ASP | C   | -2.53          | 0.93            | 2.85           | 0.55           | 0.11            | -0.16           | -0.50            | -0.31            | 110 PHE | CD1 | 0.37           | -0.97           | -0.96          | -0.74          | -0.98           | -0.98           | -1.13            | -1.11            |
| 28 ASP | O   | -1.81          | -0.28           | 0.96           | 0.77           | -0.82           | -0.85           | 0.41             | 0.50             | 111 PHE | CD2 | 0.31           | -1.17           | -1.00          | -0.66          | -0.95           | -0.84           | -1.27            | -1.15            |
| 29 ASP | CB  | 1.06           | -0.26           | 0.68           | -0.37          | -0.10           | -0.15           | -0.25            | -0.36            | 112 PHE | CE1 | 0.21           | -0.71           | -0.94          | -0.16          | -1.19           | -1.14           | -1.19            | -1.26            |
| 30 ASP | CG  | 0.28           | 0.54            | 1.07           | 0.17           | 0.03            | -0.22           | 0.06             | -0.09            | 113 PHE | CE2 | 0.16           | -0.88           | -0.74          | -0.04          | -1.18           | -0.98           | -1.19            | -1.28            |
| 31 ASP | OD1 | -0.14          | 0.55            | 1.32           | 1.14           | 0.35            | 0.64            | 0.69             | 0.90             | 114 PHE | CZ  | 0.13           | -0.80           | -0.67          | -0.04          | -1.09           | -0.99           | -1.30            | -1.33            |
| 32 ASP | OD2 | 0.09           | -0.30           | 1.28           | 1.17           | 0.59            | 0.74            | 0.83             | 0.66             | 115 PRO | N   | 2.13           | 1.30            | -1.92          | -1.46          | 0.28            | -0.17           | -0.28            | -0.45            |
| 33 CYS | N   | 1.78           | 1.12            | -2.18          | -2.14          | 0.75            | 0.58            | 0.65             | 0.56             | 116 PRO | CA  | 1.31           | -0.66           | 0.68           | -0.67          | -0.48           | -0.17           | -0.37            | -0.36            |
| 34 CYS | CA  | 0.79           | -0.43           | 1.62           | -0.93          | -0.95           | -0.41           | -0.61            | -0.76            | 117 PRO | C   | -2.39          | 1.55            | 0.38           | 0.65           | 0.43            | 0.00            | -0.39            | -0.17            |
| 35 CYS | C   | -2.02          | 1.02            | 0.35           | 0.27           | 0.03            | -0.47           | -0.78            | -0.50            | 118 PRO | O   | -1.63          | -0.09           | 0.81           | 0.86           | -0.74           | -0.89           | 0.15             | 0.15             |
| 36 CYS | O   | -2.04          | -0.91           | 0.02           | 0.25           | -1.00           | -1.17           | -0.07            | 0.10             | 119 PRO | CB  | 0.56           | -0.18           | -0.16          | 0.10           | -0.20           | -0.33           | -0.47            | -0.44            |
| 37 CYS | CB  | 0.99           | -0.85           | -0.47          | -0.98          | -0.80           | -0.51           | -0.85            | -0.86            | 120 PRO | CG  | 1.09           | -0.31           | -0.36          | -0.05          | -0.17           | -0.22           | -0.34            | -0.43            |
| 38 CYS | SG  | 0.04           | -0.91           | -0.64          | -0.31          | -0.84           | -0.98           | -0.90            | -0.88            | 121 PRO | CD  | 0.93           | -0.03           | -1.60          | -0.95          | 0.14            | 0.04            | -0.16            | -0.11            |
| 39 GLN | N   | 2.22           | 0.86            | -2.72          | -1.98          | 1.02            | 0.87            | 0.63             | 0.89             | 122 SER | N   | 1.91           | 1.12            | -2.56          | -1.73          | 0.80            | 0.63            | 0.50             | 0.60             |
| 40 GLN | CA  | 1.49           | 0.12            | 0.99           | -0.70          | -1.11           | -0.35           | -0.79            | -0.45            | 123 SER | CA  | 0.87           | 0.23            | 0.96           | -0.68          | -0.73           | -0.28           | -0.64            | -0.48            |
| 41 GLN | C   | -2.62          | 0.93            | 2.55           | 0.71           | 0.60            | -0.53           | -0.70            | -0.47            | 124 SER | C   | -2.45          | 1.33            | 2.82           | 0.95           | 0.45            | -0.32           | -0.65            | -0.57            |
| 42 GLN | O   | -1.96          | -0.71           | 0.66           | 0.78           | -1.08           | -0.99           | 0.22             | 0.36             | 125 SER | O   | -1.83          | -0.86           | 0.72           | 0.60           | -0.84           | -0.95           | 0.12             | 0.25             |
| 43 GLN | CB  | 1.26           | -1.13           | 0.63           | -1.00          | -0.37           | -0.32           | -0.47            | -0.50            | 126 SER | CB  | 0.76           | -0.60           | 0.11           | -0.55          | -0.25           | -0.31           | -0.38            | -0.43            |
| 44 GLN | CG  | 1.18           | -0.37           | 0.01           | -0.55          | 0.03            | -0.08           | -0.43            | -0.37            | 127 SER | OG  | -0.26          | -0.65           | 0.39           | -0.30          | -0.20           | -0.11           | 0.16             | 0.13             |
| 45 GLN | CD  | 1.79           | -0.67           | 0.03           | 0.45           | -0.59           | -1.02           | -0.64            | -0.79            | 128 THR | N   | 1.82           | 1.89            | -2.47          | -1.87          | 0.73            | 0.90            | 0.68             | 0.76             |
| 46 GLN | OE1 | 0.10           | -0.84           | 0.17           | 0.56           | -0.03           | 0.33            | -0.06            | -0.17            | 129 THR | CA  | 0.86           | -0.05           | 0.40           | -1.03          | -0.90           | -0.28           | -0.74            | -0.56            |
| 47 GLN | NE2 | 0.69           | -0.42           | 0.27           | -0.14          | 0.08            | 0.06            | 0.10             | -0.08            | 130 THR | C   | -2.32          | 1.53            | 1.63           | 1.05           | 0.34            | -0.39           | -0.71            | -0.54            |
| 48 GLU | N   | 2.34           | 1.48            | -2.79          | -1.71          | 1.21            | 0.72            | 0.72             | 1.06             | 131 THR | O   | -2.09          | -1.16           | 1.03           | 0.48           | -0.96           | -1.34           | 0.06             | 0.17             |
| 49 GLU | CA  | 0.91           | 0.56            | 1.02           | -0.61          | -0.92           | -0.37           | -0.83            | -0.40            | 132 THR | CB  | 1.02           | -0.81           | 0.32           | -0.87          | -0.49           | -0.17           | -0.44            | -0.40            |
| 50 GLU | C   | -2.74          | 1.74            | 1.77           | 1.44           | 0.52            | 0.05            | -0.60            | -0.28            | 133 THR | OG1 | 0.15           | -0.29           | 0.30           | -0.49          | -0.25           | 0.13            | 0.01             | 0.06             |
| 51 GLU | O   | -1.80          | -0.52           | 1.07           | 0.96           | -0.91           | -0.93           | 0.39             | 0.66             | 134 THR | CG2 | 0.49           | -0.26           | -0.51          | -0.25          | -0.49           | -0.74           | -0.77            | -0.75            |
| 52 GLU | CB  | 1.39           | -0.85           | 0.82           | -0.68          | -0.05           | 0.11            | -0.29            | -0.30            | 135 TRP | N   | 1.60           | 0.67            | -2.48          | -2.18          | 0.77            | 0.81            | 0.41             | 0.72             |
| 53 GLU | CG  | 1.09           | 0.08            | 0.32           | -0.24          | 0.20            | -0.11           | -0.41            | -0.36            | 136 TRP | CA  | 0.52           | -0.67           | 2.33           | -0.94          | -0.96           | -0.53           | -0.81            | -0.54            |
| 54 GLU | CD  | 1.14           | -0.48           | 0.51           | 1.21           | 0.02            | -0.11           | -0.35            | -0.50            | 137 TRP | C   | -2.26          | 1.06            | 2.94           | 0.94           | -0.36           | -0.69           | -0.88            | -0.42            |
| 55 GLU | OE1 | 0.41           | -0.39           | 0.90           | 1.50           | 0.65            | 0.56            | 0.58             | 0.21             | 138 TRP | O   | -2.09          | -1.17           | 0.74           | 0.46           | -1.08           | -1.09           | 0.06             | -0.07            |
| 56 GLU | OE2 | 0.56           | 0.25            | 1.43           | 1.58           | 0.67            | 0.75            | 0.56             | 0.45             | 139 TRP | CB  | 0.96           | -1.41           | -0.60          | -1.13          | -0.91           | -0.93           | -1.03            | -1.02            |
| 57 GLY | N   | 1.62           | 0.36            | -2.27          | -1.77          | 0.29            | 0.46            | 0.40             | 0.57             | 140 TRP | CG  | 1.66           | -0.44           | 0.20           | 0.00           | -0.98           | -0.93           | -1.35            | -1.25            |
| 58 GLY | CA  | 0.93           | -0.12           | -0.02          | -0.64          | -0.39           | -0.23           | -0.42            | -0.30            | 141 TRP | CD1 | 0.10           | -0.95           | -0.66          | -0.55          | -0.60           | -0.57           | -0.60            | -0.62            |
| 59 GLY | C   | -1.67          | 0.41            | 0.46           | 0.29           | -0.23           | -0.68           | -0.66            | -0.54            | 142 TRP | CD2 | 1.89           | 0.05            | 1.07           | 0.61           | -1.05           | -0.63           | -1.33            | -1.24            |
| 60 GLY | O   | -1.69          | -0.82           | 0.61           | 0.61           | -0.72           | -0.73           | 0.10             | 0.15             | 143 TRP | NE1 | 0.28           | -0.53           | -0.54          | -0.58          | -0.58           | -0.31           | -0.26            | -0.39            |
| 61 HIS | N   | 1.84           | 1.03            | -2.54          | -1.98          | 0.84            | 0.55            | 0.51             | 0.70             | 144 TRP | CE2 | 0.94           | -0.04           | 0.18           | 1.55           | -1.34           | -1.00           | -1.08            | -0.97            |
| 62 HIS | CA  | 0.83           | -0.02           | 0.86           | -0.99          | -0.91           | -0.29           | -0.64            | -0.28            | 145 TRP | CE3 | 0.19           | -1.00           | -1.38          | -0.12          | -1.15           | -0.88           | -1.28            | -1.24            |
| 63 HIS | C   | -2.46          | 1.11            | 1.35           | -0.02          | 0.16            | -0.66           | -0.74            | -0.45            | 146 TRP | CZ2 | 0.39           | -0.44           | -0.95          | -0.25          | -0.77           | -0.50           | -0.72            | -0.80            |
| 64 HIS | O   | -2.04          | -1.05           | 0.23           | 0.43           | -1.02           | -1.15           | 0.07             | 0.21             | 147 TRP | CZ3 | -0.07          | -1.09           | -1.18          | -0.16          | -1.11           | -1.05           | -1.16            | -1.26            |
| 65 HIS | CB  | 1.16           | -0.86           | 0.19           | -0.82          | -0.63           | -0.41           | -0.84            | -0.69            | 148 TRP | CH2 | -0.02          | -0.72           | -0.84          | -0.05          | -1.00           | -0.93           | -1.11            | -0.98            |
| 66 HIS | CG  | 1.77           | -0.10           | 0.46           | 0.18           | -0.83           | -0.78           | -1.16            | -1.11            | 149 TYR | N   | 1.55           | 0.90            | -2.34          | -2.16          | 0.78            | 0.63            | 0.39             | 0.52             |
| 67 HIS | ND1 | -0.01          | -0.18           | -0.17          | -0.21          | -0.             |                 |                  |                  |         |     |                |                 |                |                |                 |                 |                  |                  |

Table 3. (continued)

|        |     | 87<br>LYS<br>N | 88<br>LYS<br>CA | 89<br>LYS<br>C | 90<br>LYS<br>O | 91<br>LYS<br>CB | 92<br>LYS<br>CG | 93<br>LYS<br>CD | 94<br>LYS<br>CE | 95<br>LYS<br>NZ |         |     | 87<br>LYS<br>N | 88<br>LYS<br>CA | 89<br>LYS<br>C | 90<br>LYS<br>O | 91<br>LYS<br>CB | 92<br>LYS<br>CG | 93<br>LYS<br>CD | 94<br>LYS<br>CE | 95<br>LYS<br>NZ |
|--------|-----|----------------|-----------------|----------------|----------------|-----------------|-----------------|-----------------|-----------------|-----------------|---------|-----|----------------|-----------------|----------------|----------------|-----------------|-----------------|-----------------|-----------------|-----------------|
| 0 SAS  | SAS | 1.75           | 0.99            | 1.79           | 0.78           | 0.69            | 0.51            | 0.19            | 0.03            | -0.19           | 83 LEU  | CB  | 1.08           | -0.93           | 0.31           | -0.86          | -0.15           | -0.06           | 0.20            | 0.38            | 1.44            |
| 1 ALA  | N   | 1.89           | 1.19            | -2.41          | -1.69          | 1.17            | 1.51            | 1.53            | 1.56            | 1.62            | 84 LEU  | CG  | 0.85           | -0.41           | -0.62          | -1.02          | -0.22           | -0.14           | 0.07            | 0.27            | 1.51            |
| 2 ALA  | CA  | 1.14           | 0.04            | 0.73           | -0.40          | -0.92           | -0.14           | -0.61           | 0.13            | 0.67            | 85 LEU  | CD1 | 0.63           | -0.85           | -0.59          | 0.24           | -0.41           | -0.47           | -0.14           | 0.12            | 1.15            |
| 3 ALA  | C   | -2.49          | 1.18            | 1.33           | 0.75           | 0.21            | 0.07            | 0.02            | 0.14            | 0.84            | 86 LEU  | CD2 | 0.84           | -0.53           | -0.61          | 0.28           | -0.42           | -0.41           | -0.30           | 0.02            | 0.80            |
| 4 ALA  | O   | -1.93          | -0.62           | 1.02           | 0.94           | -1.10           | -0.64           | -0.01           | -0.06           | 0.01            | 87 LYS  | N   | 1.14           | 1.35            | -2.42          | -1.72          | 1.34            | 1.11            | 1.80            | 1.88            | 1.97            |
| 5 ALA  | CB  | 0.87           | -0.74           | -0.15          | -0.62          | 0.06            | 0.04            | 0.31            | 0.35            | 0.90            | 88 LYS  | CA  | 1.36           | 0.18            | 1.36           | -0.45          | -0.49           | 0.18            | -0.17           | 0.21            | 0.80            |
| 6 ARG  | N   | 1.69           | 1.16            | -2.24          | -1.66          | 1.33            | 1.05            | 1.64            | 1.97            | 2.14            | 89 LYS  | C   | -2.39          | 1.36            | 1.98           | 0.77           | 0.31            | -0.32           | 0.00            | 0.39            | 1.11            |
| 7 ARG  | CA  | 1.33           | 0.07            | 1.28           | -0.44          | -0.82           | -0.07           | -0.34           | 0.21            | 0.66            | 90 LYS  | O   | -1.73          | -0.46           | 0.78           | 0.83           | -0.72           | -0.49           | 0.23            | 0.29            | 0.23            |
| 8 ARG  | C   | -2.31          | 1.25            | 2.31           | 1.01           | 0.70            | -0.51           | 0.04            | 0.40            | 1.19            | 91 LYS  | CB  | 1.38           | -0.48           | 0.32           | -0.74          | 0.11            | 0.48            | 0.59            | 0.76            | 1.15            |
| 9 ARG  | O   | -1.90          | -0.71           | 0.99           | 0.93           | -1.05           | -0.74           | 0.12            | 0.22            | 0.33            | 92 LYS  | CG  | 1.14           | 0.20            | -0.32          | -0.51          | 0.48            | 0.52            | 0.62            | 0.71            | 1.22            |
| 10 ARG | CB  | 1.32           | -0.68           | 0.43           | -0.87          | 0.63            | 0.40            | 0.81            | 0.70            | 1.27            | 93 LYS  | CD  | 1.81           | -0.15           | 0.02           | 0.18           | 0.61            | 0.62            | 0.48            | 0.54            | 0.91            |
| 11 ARG | CG  | 1.14           | -0.04           | -0.28          | -0.70          | 0.34            | -0.14           | 0.31            | 0.45            | 0.78            | 94 LYS  | CE  | 1.86           | 0.24            | 0.40           | 0.20           | 0.77            | 0.72            | 0.54            | 0.76            | 0.89            |
| 12 ARG | CD  | 1.21           | -0.41           | -0.36          | -0.25          | 0.26            | 0.40            | 0.43            | 0.59            | 0.86            | 95 LYS  | NZ  | 1.99           | 0.87            | 1.10           | 0.18           | 1.22            | 1.30            | 0.99            | 0.98            | 0.58            |
| 13 ARG | NE  | 1.59           | -0.11           | 0.39           | -0.27          | 0.10            | 0.27            | 0.40            | 0.48            | 1.02            | 96 MET  | N   | 2.28           | 1.48            | -2.29          | -1.71          | 0.86            | 0.87            | 1.73            | 1.05            | 1.28            |
| 14 ARG | CZ  | 1.64           | -0.81           | -0.25          | 0.55           | -0.60           | -0.64           | -0.21           | -0.13           | 0.91            | 97 MET  | CA  | 0.73           | 0.39            | 0.40           | -0.79          | -0.58           | -0.12           | -0.39           | 0.38            | 0.79            |
| 15 ARG | NH1 | 1.06           | -0.33           | -0.36          | -0.14          | 0.20            | 0.12            | 0.40            | 0.45            | 0.61            | 98 MET  | C   | -2.53          | 0.20            | 3.29           | 1.49           | -0.09           | -0.04           | -0.05           | -0.36           | 1.07            |
| 16 ARG | NH2 | 1.16           | -0.13           | 0.12           | 0.10           | 0.23            | 0.02            | 0.02            | 0.01            | 0.43            | 99 MET  | O   | -1.78          | -1.03           | 0.81           | 0.84           | -0.62           | -0.60           | 0.26            | 0.00            | 0.27            |
| 17 ASN | N   | 1.88           | 0.98            | -2.46          | -1.73          | 0.88            | 1.08            | 1.28            | 1.36            | 1.61            | 100 MET | CB  | 0.57           | -0.69           | -0.48          | -0.83          | -0.12           | -0.03           | 0.06            | 0.43            | 1.37            |
| 18 ASN | CA  | 0.54           | -0.27           | 0.93           | -0.72          | -1.12           | -0.68           | -0.78           | -0.40           | -0.18           | 101 MET | CG  | 0.72           | -0.17           | -0.35          | -0.49          | -0.07           | -0.20           | -0.20           | 0.47            | 1.02            |
| 19 ASN | C   | -2.46          | 0.84            | 2.78           | 0.52           | 0.07            | -0.59           | -0.21           | -0.12           | 0.45            | 102 MET | SD  | 0.43           | -0.75           | -0.62          | 0.51           | -0.47           | -0.48           | -0.45           | -0.20           | 0.78            |
| 20 ASN | O   | -1.96          | -0.65           | 0.67           | 0.90           | -0.96           | -0.89           | -0.08           | -0.11           | -0.28           | 103 MET | CE  | 0.59           | -0.55           | -0.78          | 0.13           | -0.27           | -0.27           | -0.09           | 0.09            | 0.58            |
| 21 ASN | CB  | 1.12           | -0.50           | 0.10           | -0.80          | 0.02            | -0.06           | 0.05            | 0.14            | 0.48            | 104 PHE | N   | 1.57           | 0.94            | -2.69          | -1.75          | 1.34            | 1.29            | 1.91            | 1.56            | 1.88            |
| 22 ASN | CG  | 0.29           | -0.36           | 0.06           | -0.78          | -0.79           | -0.90           | -0.53           | -0.37           | 0.36            | 105 PHE | CA  | 0.40           | -0.06           | 0.36           | -0.99          | -0.74           | -0.24           | -0.32           | 0.22            | 0.80            |
| 23 ASN | OD1 | -0.83          | -0.50           | 0.23           | 0.34           | -0.55           | -0.38           | -0.49           | -0.60           | -0.57           | 106 PHE | C   | -2.62          | 0.46            | 2.18           | 0.25           | -0.34           | -0.49           | -0.28           | 0.20            | 1.43            |
| 24 ASN | ND2 | 0.56           | -0.28           | -0.40          | -0.39          | -0.17           | -0.16           | -0.27           | -0.17           | 0.08            | 107 PHE | O   | -1.76          | -1.04           | 0.41           | 0.52           | -0.87           | -0.46           | -0.04           | 0.02            | 0.03            |
| 25 ASP | N   | 0.92           | 0.64            | -2.27          | -2.25          | 0.23            | 0.51            | 0.70            | 0.86            | 0.96            | 108 PHE | CB  | 0.94           | -0.69           | -0.25          | -0.78          | 0.00            | 0.22            | 0.13            | 0.24            | 0.93            |
| 26 ASP | CA  | 0.44           | -0.80           | 0.99           | -0.50          | -1.43           | -1.00           | -1.36           | -0.79           | -0.36           | 109 PHE | CG  | 1.49           | -0.71           | -0.11          | 0.37           | -0.63           | -0.68           | -0.66           | -0.39           | 1.01            |
| 27 ASP | C   | -2.75          | 0.13            | 0.49           | 0.42           | 0.18            | -0.39           | -0.37           | -0.07           | 0.40            | 110 PHE | CD1 | 0.59           | -0.56           | -1.04          | -0.33          | -0.23           | -0.22           | -0.42           | 0.08            | 1.04            |
| 28 ASP | O   | -2.23          | -0.86           | 0.45           | 0.77           | -1.29           | -1.10           | -0.34           | -0.34           | -0.30           | 111 PHE | CD2 | 0.68           | -0.76           | -0.93          | -0.04          | -0.39           | -0.37           | -0.17           | 0.13            | 1.05            |
| 29 ASP | CB  | 0.30           | -0.63           | 0.35           | -1.04          | -0.65           | -0.71           | -0.70           | -0.41           | -0.22           | 112 PHE | CE1 | 0.39           | -0.34           | -0.71          | 0.13           | -0.54           | -0.45           | -0.15           | 0.01            | 0.88            |
| 30 ASP | CG  | -0.55          | -0.34           | 0.53           | -1.39          | -1.12           | -1.32           | -1.42           | -1.01           | -0.74           | 113 PHE | CE2 | 0.59           | -0.51           | -0.56          | 0.33           | -0.58           | -0.46           | -0.36           | 0.10            | 0.73            |
| 31 ASP | OD1 | -1.21          | -0.45           | 0.13           | 0.20           | -0.67           | -0.69           | -0.99           | -0.98           | -1.40           | 114 PHE | CZ  | 0.48           | -0.59           | -0.61          | 0.33           | -0.56           | -0.41           | -0.37           | -0.04           | 0.82            |
| 32 ASP | OD2 | -0.58          | -0.44           | 0.36           | 0.33           | -0.45           | -0.72           | -0.94           | -0.97           | -1.35           | 115 PRO | N   | 1.83           | 0.82            | -0.98          | -1.47          | 0.52            | -0.09           | 0.30            | 0.77            | 1.04            |
| 33 CYS | N   | 1.39           | 0.91            | -2.11          | -1.50          | 1.20            | 1.09            | 1.49            | 1.41            | 1.60            | 116 PRO | CA  | 1.47           | -0.31           | 0.26           | -0.83          | -0.63           | -0.28           | -0.26           | 0.19            | 0.51            |
| 34 CYS | CA  | 1.05           | -0.14           | 0.57           | -0.46          | -0.15           | 0.07            | 0.07            | 0.44            | 0.71            | 117 PRO | C   | -2.41          | 0.85            | 1.24           | 0.85           | 0.23            | -0.40           | 0.35            | 0.44            | 0.55            |
| 35 CYS | C   | -2.17          | 1.80            | 3.77           | 0.79           | 0.12            | 0.03            | -0.08           | 0.36            | 1.06            | 118 PRO | O   | -1.74          | -0.38           | 0.48           | 1.05           | -0.84           | -0.78           | -0.25           | -0.32           | -0.13           |
| 36 CYS | O   | -1.54          | -0.73           | 1.14           | 0.32           | -0.39           | -0.12           | 0.18            | 0.03            | 0.18            | 119 PRO | CB  | 0.51           | -0.06           | -0.31          | -0.09          | 0.02            | -0.21           | 0.22            | 0.18            | 0.85            |
| 37 CYS | CB  | 1.03           | -0.24           | -0.11          | -0.52          | 0.46            | 0.30            | 0.52            | 0.66            | 1.27            | 120 PRO | CG  | 1.03           | -0.30           | -0.30          | -0.18          | 0.03            | 0.07            | 0.10            | 0.30            | 0.79            |
| 38 CYS | SG  | 0.48           | 0.01            | -0.60          | 0.18           | -0.21           | -0.19           | 0.26            | 0.21            | 0.97            | 121 PRO | CD  | 1.40           | 0.08            | -1.57          | -1.13          | 0.27            | 0.41            | 0.22            | 0.60            | 0.79            |
| 39 GLN | N   | 1.37           | 1.51            | -2.61          | -2.04          | 0.91            | 0.93            | 1.92            | 1.81            | 2.03            | 122 SER | N   | 1.15           | 1.08            | -2.25          | -1.75          | 0.52            | 0.84            | 1.28            | 1.19            | 1.02            |
| 40 GLN | CA  | 1.11           | -0.44           | 0.93           | -0.30          | -1.20           | -0.55           | -0.68           | -0.29           | 0.43            | 123 SER | CA  | 0.68           | -0.43           | 0.72           | -0.65          | -0.82           | -0.19           | -0.71           | -0.21           | 0.15            |
| 41 GLN | C   | -2.57          | 0.59            | 3.65           | 1.17           | 0.08            | -0.49           | -0.25           | -0.11           | 0.58            | 124 SER | C   | -2.52          | 0.52            | 2.10           | 0.57           | 0.35            | 0.27            | -0.03           | -0.06           | 0.41            |
| 42 GLN | O   | -2.07          | -0.59           | 1.01           | 0.75           | -1.21           | -0.91           | -0.17           | -0.08           | 0.03            | 125 SER | O   | -1.89          | -0.32           | 0.82           | 0.74           | -0.89           | -0.76           | -0.04           | -0.18           | -0.22           |
| 43 GLN | CB  | 0.78           | -1.03           | 0.62           | -1.13          | -0.39           | -0.45           | -0.04           | -0.18           | 0.39            | 126 SER | CB  | 0.76           | -0.52           | 0.06           | -0.55          | -0.12           | -0.14           | -0.01           | 0.05            | 0.43            |
| 44 GLN | CG  | 1.15           | -0.58           | -0.33          | -0.81          | -0.09           | -0.08           | 0.37            | 0.48            | 0.63            | 127 SER | OG  | -0.54          | -0.46           | 0.10           | -0.19          | -0.61           | -0.13           | -0.16           | -0.20           | -0.07           |
| 45 GLN | CD  | 1.13           | -1.45           | -0.04          | 0.44           | -0.76           | -0.97           | -0.83           | -0.34           | 0.33            | 128 THR | N   | 1.29           | 1.31            | -2.32          | -1.81          | 0.65            | 0.64            | 1.19            | 1.17            | 1.17            |
| 46 GLN | OE1 | -0.16          | -0.79           | 0.21           | 0.66           | -0.20           | -0.42           | -0.72           | -0.71           | -0.54           | 129 THR | CA  | 0.61           | -0.94           | 0.62           | -0.68          | -0.62           | -0.39           | -0.48           | -0.17           | 0.58            |
| 47 GLN | NE2 | 0.68           | -0.73           | -0.21          | -0.19          | -0.29           | -0.33           | -0.38           | -0.28           | -0.01           | 130 THR | C   | -2.54          | 0.83            | 2.40           | 0.79           | -0.05           | -0.27           | -0.11           | -0.18           | 0.65            |
| 48 GLU | N   | 1.25           | 1.05            | -2.59          | -2.33          | 0.30            | 0.88            | 1.28            | 1.21            | 1.21            | 131 THR | O   | -1.87          | -0.72           | 0.87           | 0.69           | -0.77           | -0.79           | 0.02            | -0.18           | -0.06           |
| 49 GLU | CA  | 0.90           | -0.80           | 1.25           | -0.67          | -1.55           | -0.87           | -1.26           | -0.67           | -0.21           | 132 THR | CB  | 0.29           | -0.61           | 0.48           | -0.74          | -0.40           | -0.34           | -0.14           | 0.00            | 0.67            |
| 50 GLU | C   | -2.72          | -0.07           | 1.64           | 0.93           | -0.16           | -0.53           | -0.44           | -0.17           | -0.06           | 133 THR | OG1 | -0.61          | -0.45           | 0.20           | -0.42          | -0.50           | -0.41           | -0.15           | -0.29           | -0.10           |
| 51 GLU | O   | -2.40          | -0.75           | 0.71           | 0.72           | -1.57           | -1.22           | -0.34           | -0.38           | -0.24           | 134 THR | CG2 | 0.66           | -0.12           | -0.39          | -0.17          | -0.22           | -0.49           | -0.25           | -0.30           | 0.25            |
| 52 GLU | CB  | 0.44           | -1.28           | 0.19           | -1.26          | -0.80           | -0.62           | -0.57           | -0.40           | -0.12           | 135 TRP | N   | 2.05           | 0.69            | -2.48          | -1.87          | 0.68            | 0.83            | 1.03            | 1.57            | 1.52            |
| 53 GLU | CG  | 0.68           | -0.79           | -0.27          | -1.02          | -0.58           | -0.88           | -0.70           | -0.62           | -0.27           | 136 TRP | CA  | 0.88           | -1.02           | 1.57           | -1.10          | -1.00           | -0.44           | -0.41           | 0.09            | 0.62            |
| 54 GLU | CD  | 0.77           | -1.24           | -0.37          | 0.24           | -0.99           | -1.43           | -1.71           | -1.42           | -0.89           | 137 TRP | C   | -2.61          | 1.08            | 3.04           | 0.05           | 0.58            | -0.43           | 0.06            | -0.40           | 1.02            |
| 55 GLU | OE1 | 0.13           | -0.79           | 0.67           | 1.00           | -0.20           | -0.47           | -1.23           | -1.11           | -1.39           | 138 TRP | O   | -2.13          | -1.25           | 0.12           | 0.48           | -1.02           | -0.80           | 0.30            | -0.05           | 1.13            |
| 56 GLU | OE2 | 0.04           | -0.37           | 0.58           | 0.90           | -0.29           | -0.56           | -1.05           | -1.23           | -1.45           | 139 TRP | CB  | 0.69           | -0.81           | 0.23           | -0.71          | -0.25           | -0.26           | -0.11           | -0.02           | 0.98            |
| 57 GLY | N   | 1.65           | 0.54            | -2.21          | -1.55          | 0.69            | 0.69            | 0.86            | 1.00            | 1.05            | 140 TRP | CG  | 1.01           | -1.03           | -0.19          | -0.13          | -0.55           | -1.21           | -0.72           | -0.82           | 0.84            |
| 58 GLY | CA  | 0.97           | -0.07           | 0.20           | -0.51          | -0.09           | -0.05           | -0.15           | -0.06           | 0.16            | 141 TRP | CD1 | 0.30           | -0.69           | -1.24          | -0.63          | -0.44           | -0.35           | -0.15           | -0.29           | 0.39            |
| 59 GLY | C   | -1.62          | 0.23            | 1.56           | 0.72           | -0.05           | -0.60           | -0.19           | -0.20           | 0.44            | 142 TRP | CD2 | 1.00           | -1.08           | -0.73          | 0.29           | -1.18           | -1.48           | -0.87           | -0.82           | 0.66            |
| 60 GLY | O   | -1.44          | -0.62           | 1.22           | 1.03           | -0.52           | -0.77           | -0.22           | -0.33           | -0.39           | 143 TRP | NE1 | 0.33           | -0.46           | -0.71          | -0.15          | -0.24           | -0.32           | -0.51           | -0.40           | 0.15            |
| 61 HIS | N   |                |                 |                |                |                 |                 |                 |                 |                 |         |     |                |                 |                |                |                 |                 |                 |                 |                 |

Table 3. (continued)

|        |     | 96<br>MET<br>N | 97<br>MET<br>CA | 98<br>MET<br>C | 99<br>MET<br>O | 100<br>MET<br>CB | 101<br>MET<br>CG | 102<br>MET<br>SD | 103<br>MET<br>CE |         |     | 96<br>MET<br>N | 97<br>MET<br>CA | 98<br>MET<br>C | 99<br>MET<br>O | 100<br>MET<br>CB | 101<br>MET<br>CG | 102<br>MET<br>SD | 103<br>MET<br>CE |
|--------|-----|----------------|-----------------|----------------|----------------|------------------|------------------|------------------|------------------|---------|-----|----------------|-----------------|----------------|----------------|------------------|------------------|------------------|------------------|
| 0 SAS  | SAS | 1.51           | 1.67            | 2.10           | 1.41           | 1.56             | 1.44             | 1.40             | 1.20             | 83 LEU  | CB  | 1.48           | -1.26           | -0.03          | -1.20          | -0.71            | -0.84            | -1.06            | -0.92            |
| 1 ALA  | N   | 1.70           | 0.95            | -2.51          | -2.00          | 0.47             | 0.53             | 0.12             | -0.01            | 84 LEU  | CG  | 0.67           | -0.41           | -0.42          | -1.37          | -0.71            | -0.95            | -1.15            | -0.90            |
| 2 ALA  | CA  | 1.18           | -0.11           | 0.81           | -0.56          | -0.97            | -0.62            | -1.24            | -0.90            | 85 LEU  | CD1 | 0.51           | -1.12           | -1.02          | -0.19          | -1.01            | -1.04            | -1.21            | -1.08            |
| 3 ALA  | C   | -2.27          | 0.56            | 2.83           | 1.05           | -0.10            | -0.36            | -0.63            | -1.07            | 86 LEU  | CD2 | 0.70           | -0.79           | -0.56          | 0.01           | -0.89            | -0.94            | -1.31            | -1.14            |
| 4 ALA  | O   | -2.00          | -0.61           | 0.76           | 0.50           | -1.13            | -0.74            | 0.47             | -0.20            | 87 LYS  | N   | 2.28           | 0.71            | -2.56          | -1.79          | 0.55             | 0.69             | 0.39             | 0.55             |
| 5 ALA  | CB  | 0.75           | -0.99           | -0.43          | -0.82          | -0.58            | -0.69            | -0.93            | -0.79            | 88 LYS  | CA  | 1.51           | 0.39            | 0.19           | -1.01          | -0.69            | -0.17            | -0.76            | -0.56            |
| 6 ARG  | N   | 0.93           | 1.16            | -2.65          | -1.91          | 1.08             | 0.89             | 0.20             | 0.41             | 89 LYS  | C   | -2.25          | 0.41            | 3.29           | 0.79           | -0.50            | -0.36            | -0.62            | -0.80            |
| 7 ARG  | CA  | 1.47           | 0.40            | 1.32           | -0.66          | -0.71            | -0.10            | -0.93            | -0.44            | 90 LYS  | O   | -1.72          | -0.82           | 1.50           | 0.83           | -0.84            | -0.49            | 0.57             | 0.16             |
| 8 ARG  | C   | -2.42          | 0.37            | 0.84           | 0.52           | -0.29            | -0.13            | -0.89            | -0.85            | 91 LYS  | CB  | 0.87           | -0.56           | -0.08          | -0.61          | -0.11            | -0.06            | -0.47            | -0.27            |
| 9 ARG  | O   | -1.80          | -0.91           | 0.46           | 0.78           | -0.89            | -0.53            | 0.43             | 0.06             | 92 LYS  | CG  | 0.89           | -0.09           | -0.04          | -0.61          | -0.02            | -0.19            | -0.47            | -0.27            |
| 10 ARG | CB  | 1.04           | -0.93           | -0.17          | -0.89          | 0.00             | -0.02            | -0.59            | -0.35            | 93 LYS  | CD  | 1.74           | -0.36           | -0.07          | 0.21           | 0.09             | -0.18            | -0.44            | -0.08            |
| 11 ARG | CG  | 1.15           | 0.13            | -0.16          | -0.50          | -0.08            | -0.42            | -0.55            | -0.40            | 94 LYS  | CE  | 1.07           | 0.41            | -0.34          | -0.04          | 0.45             | 0.49             | -0.19            | 0.10             |
| 12 ARG | CD  | 1.35           | -0.10           | -0.09          | -0.18          | 0.25             | 0.02             | -0.68            | -0.15            | 95 LYS  | NZ  | 1.31           | 0.87            | 1.07           | 0.23           | 1.45             | 1.09             | 0.81             | 0.65             |
| 13 ARG | NE  | 1.43           | 0.06            | 0.61           | -0.31          | 0.22             | -0.22            | -0.25            | -0.20            | 96 MET  | N   | 2.43           | 0.40            | -2.24          | -2.02          | 1.43             | 0.77             | 0.18             | 0.06             |
| 14 ARG | CZ  | 0.58           | -0.72           | 0.73           | 1.06           | -0.17            | -0.78            | -0.61            | -0.83            | 97 MET  | CA  | 0.43           | -1.16           | 1.64           | -0.82          | -1.11            | -0.59            | -1.09            | -0.47            |
| 15 ARG | NH1 | 0.97           | -0.24           | 0.00           | -0.15          | 0.33             | 0.08             | 0.04             | -0.03            | 98 MET  | C   | -2.21          | 1.65            | 2.48           | 1.02           | 0.03             | -0.30            | -0.60            | -0.76            |
| 16 ARG | NH2 | 0.90           | -0.15           | 0.11           | -0.01          | 0.30             | -0.09            | 0.30             | 0.10             | 99 MET  | O   | -2.03          | -0.87           | 1.03           | 1.05           | -1.01            | -1.15            | 0.33             | -0.08            |
| 17 ASN | N   | 1.84           | 1.03            | -2.48          | -1.54          | 0.83             | 0.29             | 0.31             | 0.69             | 100 MET | CB  | 1.44           | -1.10           | 0.02           | -1.00          | -0.51            | -0.51            | -1.13            | -0.81            |
| 18 ASN | CA  | 0.38           | -0.06           | 1.76           | -0.95          | -0.69            | -0.62            | -0.62            | -0.65            | 101 MET | CG  | 0.80           | -0.58           | -0.33          | -1.13          | -0.51            | -0.96            | -1.18            | -1.25            |
| 19 ASN | C   | -2.30          | 1.27            | 1.32           | 0.41           | 0.58             | -0.33            | -0.70            | -0.76            | 102 MET | SD  | 0.22           | -1.08           | -0.60          | 0.28           | -1.12            | -1.17            | -0.74            | -0.73            |
| 20 ASN | O   | -1.61          | -0.64           | 0.79           | 0.80           | -0.67            | -0.51            | 0.58             | 0.01             | 103 MET | CE  | 0.11           | -0.45           | -0.74          | -0.11          | -0.80            | -0.72            | -1.25            | -1.01            |
| 21 ASN | CB  | 0.99           | -0.41           | 0.11           | -0.64          | 0.08             | -0.27            | -0.44            | -0.45            | 104 PHE | N   | 1.62           | 1.21            | -2.07          | -2.24          | 0.76             | 0.59             | 0.20             | -0.03            |
| 22 ASN | CG  | 1.01           | -0.37           | -0.11          | -0.13          | -0.10            | -0.76            | -0.88            | -0.77            | 105 PHE | CA  | 0.82           | -0.68           | 0.41           | -1.11          | -0.95            | -0.47            | -1.42            | -1.14            |
| 23 ASN | OD1 | -0.81          | -0.35           | 0.75           | 0.59           | -0.13            | -0.23            | 0.40             | -0.15            | 106 PHE | C   | -2.34          | 0.01            | -0.96          | 0.11           | 0.26             | -0.39            | -0.80            | -1.06            |
| 24 ASN | ND2 | 0.86           | -0.24           | -0.17          | -0.14          | 0.11             | -0.10            | -0.09            | 0.01             | 107 PHE | O   | -2.14          | -1.07           | 0.33           | 0.53           | -1.13            | -0.89            | 0.46             | -0.09            |
| 25 ASP | N   | 1.28           | 0.32            | -2.70          | -1.54          | 0.78             | 0.58             | 0.26             | 0.49             | 108 PHE | CB  | 0.73           | -0.92           | -0.51          | -1.05          | -0.93            | -0.71            | -1.25            | -1.01            |
| 26 ASP | CA  | 1.00           | 0.23            | 0.18           | -0.61          | -0.70            | -0.46            | -0.19            | -0.32            | 109 PHE | CG  | 1.25           | -0.87           | 0.18           | -0.63          | -1.02            | -1.32            | -1.11            | -1.60            |
| 27 ASP | C   | -2.31          | 0.95            | 0.30           | 0.52           | 0.28             | -0.29            | -0.42            | -0.64            | 110 PHE | CD1 | 0.84           | -0.92           | -0.96          | -0.87          | -1.07            | -1.13            | -1.20            | -1.12            |
| 28 ASP | O   | -1.63          | -0.60           | 0.99           | 1.11           | -0.68            | -0.55            | 0.52             | 0.12             | 111 PHE | CD2 | 0.32           | -0.90           | -1.00          | -0.54          | -1.01            | -0.99            | -1.19            | -1.11            |
| 29 ASP | CB  | 1.02           | -0.59           | 0.19           | -0.53          | -0.09            | -0.27            | -0.29            | -0.33            | 112 PHE | CE1 | 0.32           | -0.86           | -1.03          | -0.32          | -1.35            | -1.29            | -1.19            | -1.16            |
| 30 ASP | CG  | 0.13           | -0.15           | 0.63           | -0.42          | -0.26            | -0.15            | 0.41             | -0.12            | 113 PHE | CE2 | 0.28           | -0.92           | -1.02          | -0.19          | -1.21            | -1.27            | -1.07            | -1.11            |
| 31 ASP | OD1 | -0.53          | 0.47            | 0.63           | 0.78           | 0.02             | 0.62             | 1.35             | 0.68             | 114 PHE | CZ  | 0.33           | -0.81           | -0.83          | 0.06           | -1.21            | -1.36            | -1.23            | -1.25            |
| 32 ASP | OD2 | -0.07          | -0.59           | 0.78           | 1.01           | 0.21             | 0.52             | 1.33             | 0.57             | 115 PRO | N   | 2.63           | 0.84            | -1.67          | -1.56          | 0.48             | -0.12            | -0.98            | -0.35            |
| 33 CYS | N   | 1.13           | 1.60            | -2.41          | -2.35          | 0.62             | -0.11            | 0.29             | 0.10             | 116 PRO | CA  | 0.71           | -0.52           | 0.26           | -0.91          | -0.42            | -0.29            | -0.82            | -0.33            |
| 34 CYS | CA  | 0.78           | -0.80           | 0.67           | -0.38          | -0.66            | -0.74            | -0.93            | -0.80            | 117 PRO | C   | -2.24          | 1.31            | 2.01           | 0.88           | 0.70             | -0.30            | -0.55            | -0.76            |
| 35 CYS | C   | -1.99          | 0.07            | 4.00           | 0.97           | -0.24            | -0.80            | -1.10            | -1.06            | 118 PRO | O   | -1.61          | -0.52           | 0.33           | 0.93           | -0.68            | -0.55            | 0.23             | -0.29            |
| 36 CYS | O   | -2.23          | -1.36           | 0.42           | 0.28           | -1.14            | -1.14            | 0.42             | -0.45            | 119 PRO | CB  | 0.67           | 0.16            | 0.14           | 0.21           | -0.22            | -0.37            | -0.87            | -0.63            |
| 37 CYS | CB  | 0.91           | -0.80           | -0.06          | -0.93          | -0.77            | -1.00            | -1.16            | -1.01            | 120 PRO | CG  | 0.68           | -0.43           | -0.45          | -0.16          | -0.16            | -0.32            | -0.81            | -0.37            |
| 38 CYS | SG  | 0.19           | -0.84           | -0.95          | -0.69          | -0.81            | -1.06            | -0.73            | -0.84            | 121 PRO | CD  | 0.90           | -0.29           | -1.42          | -1.03          | -0.15            | 0.10             | -0.79            | -0.27            |
| 39 GLN | N   | 1.22           | 1.60            | -2.84          | -1.78          | 0.59             | 1.07             | 0.53             | 0.64             | 122 SER | N   | 1.70           | 0.91            | -2.17          | -1.62          | 0.42             | 0.57             | 0.11             | 0.09             |
| 40 GLN | CA  | 1.15           | 0.18            | 0.09           | -1.14          | -1.18            | -0.41            | -0.91            | -0.61            | 123 SER | CA  | 0.90           | -0.58           | 0.30           | -0.76          | -0.73            | -0.34            | -0.94            | -0.56            |
| 41 GLN | C   | -2.65          | 0.60            | 1.94           | 0.78           | -0.07            | -0.08            | -0.62            | -0.78            | 124 SER | C   | -2.28          | 0.70            | 2.21           | 0.59           | 0.07             | -0.16            | -0.35            | -0.62            |
| 42 GLN | O   | -1.76          | -0.51           | 0.30           | 0.95           | -0.91            | -0.41            | 0.60             | 0.12             | 125 SER | O   | -1.83          | -0.53           | 0.60           | 0.63           | -0.90            | -0.57            | 0.63             | 0.09             |
| 43 GLN | CB  | 0.47           | -0.77           | 0.21           | -0.69          | -0.35            | -0.43            | -0.82            | -0.69            | 126 SER | CB  | 0.57           | -0.38           | 0.04           | -0.58          | -0.26            | -0.13            | -0.45            | -0.39            |
| 44 GLN | CG  | 0.73           | -0.48           | -0.52          | -0.72          | -0.21            | -0.27            | -0.59            | -0.44            | 127 SER | OG  | -0.42          | -0.34           | 0.05           | -0.19          | -0.41            | -0.21            | 0.38             | -0.11            |
| 45 GLN | CD  | 1.32           | -0.79           | 0.10           | 0.32           | -0.72            | -0.74            | -0.82            | -0.65            | 128 THR | N   | 1.64           | 0.92            | -2.22          | -1.74          | 0.41             | 0.51             | 0.17             | 0.28             |
| 46 GLN | OE1 | 0.01           | -0.72           | 0.32           | 0.41           | -0.20            | -0.22            | 0.28             | -0.08            | 129 THR | CA  | 0.74           | -0.96           | 0.20           | -0.90          | -0.96            | -0.56            | -0.96            | -0.70            |
| 47 GLN | NE2 | 0.49           | -0.25           | -0.23          | -0.22          | -0.01            | -0.12            | -0.01            | -0.09            | 130 THR | C   | -2.35          | -0.06           | 3.84           | 1.35           | 0.23             | -0.71            | -0.83            | -0.76            |
| 48 GLU | N   | 1.80           | 0.55            | -2.80          | -1.79          | 1.10             | 1.07             | 0.41             | 0.94             | 131 THR | O   | -1.95          | -0.67           | 0.93           | 0.45           | -1.04            | -0.88            | 0.61             | -0.17            |
| 49 GLU | CA  | 1.11           | -0.04           | 1.72           | -0.92          | -0.74            | -0.30            | -0.71            | -0.33            | 132 THR | CB  | 0.98           | -0.54           | 0.30           | -0.69          | 0.01             | -0.22            | -0.34            | -0.28            |
| 50 GLU | C   | -2.62          | 1.24            | 3.89           | 0.32           | 0.14             | -0.07            | -0.60            | -0.68            | 133 THR | OG1 | -0.23          | -0.41           | 0.66           | -0.37          | -0.30            | -0.46            | 0.20             | -0.09            |
| 51 GLU | O   | -1.64          | -0.54           | 1.68           | 1.08           | -0.72            | -0.45            | 0.69             | 0.29             | 134 THR | CG2 | 0.75           | -0.04           | -0.51          | -0.24          | -0.29            | -0.62            | -0.74            | -0.77            |
| 52 GLU | CB  | 1.18           | -0.81           | 0.46           | -0.71          | -0.13            | -0.19            | -0.41            | -0.36            | 135 TRP | N   | 1.13           | 0.09            | -2.08          | -2.18          | 0.68             | 1.12             | 0.40             | 0.05             |
| 53 GLU | CG  | 0.72           | -0.36           | -0.08          | -0.53          | -0.03            | -0.20            | -0.48            | -0.43            | 136 TRP | CA  | 0.97           | -0.91           | 3.52           | -1.23          | -0.81            | -0.81            | -1.30            | -1.13            |
| 54 GLU | CD  | 0.69           | -0.98           | 0.55           | 0.21           | -0.15            | -0.24            | -0.02            | -0.32            | 137 TRP | C   | -2.31          | -0.04           | 4.00           | 0.13           | -1.27            | -0.54            | -1.04            | -1.56            |
| 55 GLU | OE1 | 0.04           | -0.86           | 0.93           | 1.49           | 0.57             | 0.22             | 1.13             | 0.51             | 138 TRP | O   | -2.03          | -1.42           | 0.47           | 0.12           | -1.10            | -1.05            | 0.26             | 0.73             |
| 56 GLU | OE2 | -0.14          | -0.36           | 1.28           | 1.23           | 0.49             | 0.44             | 0.94             | 0.43             | 139 TRP | CB  | 0.75           | -1.19           | 0.10           | -1.20          | -0.52            | -0.52            | -1.10            | -0.94            |
| 57 GLY | N   | 1.32           | 0.30            | -1.87          | -1.74          | 0.34             | 0.42             | 0.00             | 0.13             | 140 TRP | CG  | 1.80           | -1.43           | 1.72           | 0.05           | -0.68            | -0.94            | -0.77            | -1.44            |
| 58 GLY | CA  | 0.81           | -0.21           | -0.38          | -0.78          | -0.42            | -0.37            | -0.75            | -0.53            | 141 TRP | CD1 | 0.55           | -0.80           | -1.20          | -0.46          | -0.68            | -0.76            | -0.76            | -0.78            |
| 59 GLY | C   | -1.72          | 0.21            | 0.97           | -0.03          | -0.12            | -0.66            | -0.90            | -0.80            | 142 TRP | CD2 | 3.19           | -0.94           | 0.60           | 0.51           | -1.26            | -1.12            | -0.25            | -1.60            |
| 60 GLY | O   | -1.63          | -0.59           | 0.15           | 0.58           | -0.66            | -0.52            | 0.42             | -0.04            | 143 TRP | NE1 | 0.73           | -0.73           | -0.66          | -0.90          | -0.66            | -0.49            | -0.69            | -0.91            |
| 61 HIS | N   | 1.45           | 0.57            | -2.68          | -2.19          | 0.27             | 0.37             | -0.43            | 0.29             | 144 TRP | CE2 | 1.94           | -1.07           | 1.20           | 1.42           | -1.30            | -1.46            | -0.25            | -1.67            |
| 62 HIS | CA  | 0.69           | 0.11            | -0.39          | -0.82          | -1.11            | -0.79            | -1.27            | -0.88            | 145 TRP | CE3 | -0.10          | -0.74           | -1.61          | -0.20          | -1.05            | -1.06            | -0.84            | -1.17            |
| 63 HIS | C   | -2.54          | -0.18           | 0.09           | -0.24          | 0.16             | -0.61            | -0.58            | -0.59            | 146 TRP | CZ2 | 0.48           | -0.59           | -0.61          | -0.23          | -0.91            | -1.09            | -0.97            | -1.08            |
| 64 HIS | O   | -2.19          | -1.58           | 0.35           | 0.29           | -1.41            | -1.12            | 0.08             | -0.23            | 147 TRP | CZ3 | -0.03          | -1.26           | -0.72          | -0.10          | -1.08            | -1.28            | -0.94            | -1.15            |
| 65 HIS | CB  | 0.16           | -1.08           | -0.30          | -0.96          | -0.80            | -0.52            | -0.86            | -0.65            | 148 TRP | CH2 | 0.24           | -0.99           | -1.03          | -0.38          | -0.93            | -1.17            | -0.90            | -1.16            |
| 66 HIS | CG  | 1.07           | -0.30           | 0.04           | 0.04           | -0.92            | -0.43            | -0.91            | -1.35            | 149 TYR | N   | 1.80           | 0.38            | -2.34          | -2.37          | 0.60             | 0.22             | 0.08             | 0.23             |
| 67 HIS | ND1 | 0.42           | -0.71           | -0.28          | -0.49          | -1.00            | -0.22</          |                  |                  |         |     |                |                 |                |                |                  |                  |                  |                  |

Table 3. (continued)

|        |     | 104<br>PHE<br>N | 105<br>PHE<br>CA | 106<br>PHE<br>C | 107<br>PHE<br>O | 108<br>PHE<br>CB | 109<br>PHE<br>CG | 110<br>PHE<br>CD1 | 111<br>PHE<br>CD2 | 112<br>PHE<br>CE1 | 113<br>PHE<br>CE2 | 114<br>PHE<br>CZ |         |     | 104<br>PHE<br>N | 105<br>PHE<br>CA | 106<br>PHE<br>C | 107<br>PHE<br>O | 108<br>PHE<br>CB | 109<br>PHE<br>CG | 110<br>PHE<br>CD1 | 111<br>PHE<br>CD2 | 112<br>PHE<br>CE1 | 113<br>PHE<br>CE2 | 114<br>PHE<br>CZ |
|--------|-----|-----------------|------------------|-----------------|-----------------|------------------|------------------|-------------------|-------------------|-------------------|-------------------|------------------|---------|-----|-----------------|------------------|-----------------|-----------------|------------------|------------------|-------------------|-------------------|-------------------|-------------------|------------------|
| 0 SAS  | SAS | 2.28            | 1.89             | 2.14            | 1.47            | 1.83             | 2.20             | 1.72              | 1.71              | 1.52              | 1.54              | 1.49             | 83 LEU  | CB  | 0.99            | -1.13            | 0.38            | -1.19           | -0.86            | -1.09            | -0.99             | -0.95             | -1.20             | -1.18             | -1.10            |
| 1 ALA  | N   | 1.89            | 0.52             | -2.41           | -1.87           | 0.35             | 0.62             | 0.30              | 0.11              | 0.20              | 0.23              | 0.26             | 84 LEU  | CG  | 0.85            | -0.71            | -0.51           | -1.28           | -0.67            | -0.68            | -0.98             | -0.85             | -1.14             | -0.99             | -1.00            |
| 2 ALA  | CA  | 0.67            | -0.50            | -0.08           | -0.80           | -0.85            | -0.97            | -0.86             | -0.83             | -0.82             | -0.84             | -0.84            | 85 LEU  | CD1 | 0.53            | -0.81            | -0.76           | 0.06            | -1.06            | -1.54            | -1.13             | -1.26             | -1.19             | -1.19             | -1.30            |
| 3 ALA  | C   | -2.38           | 1.27             | 2.14            | 0.54            | 0.04             | 0.36             | -1.00             | -1.01             | -1.05             | -0.85             | -0.59            | 86 LEU  | CD2 | 0.79            | -0.58            | -0.42           | 0.17            | -0.98            | -1.45            | -1.11             | -1.14             | -1.25             | -1.28             | -1.33            |
| 4 ALA  | O   | -1.91           | -0.81            | 0.66            | 0.46            | -0.94            | 0.37             | -0.46             | -0.23             | -0.08             | 0.16              | 0.18             | 87 LYS  | N   | 1.57            | 0.38             | -2.65           | -1.76           | 0.92             | 1.46             | 0.56              | 0.65              | 0.36              | 0.56              | 0.44             |
| 5 ALA  | CB  | 0.70            | -0.86            | -0.29           | -0.65           | -0.47            | -0.95            | -0.77             | -0.71             | -0.96             | -0.91             | -0.95            | 88 LYS  | CA  | 0.96            | -0.05            | 0.44            | -1.01           | -0.69            | -0.71            | -0.56             | -0.76             | -0.35             | -0.51             | -0.59            |
| 6 ARG  | N   | 2.35            | 0.85             | -2.48           | -1.79           | 0.76             | 1.24             | 0.80              | 0.37              | 0.42              | 0.54              | 0.17             | 89 LYS  | C   | -2.66           | 0.38             | 2.18            | 0.41            | -0.26            | -0.13            | -1.04             | -0.93             | -0.72             | -0.57             | -0.62            |
| 7 ARG  | CA  | 0.85            | -0.26            | 0.10            | -0.89           | -0.83            | -0.52            | -0.74             | -0.72             | -0.61             | -0.83             | -0.88            | 90 LYS  | O   | -1.76           | -1.03            | 0.26            | 0.51            | -0.78            | 0.35             | -0.31             | -0.02             | 0.16              | 0.38              | 0.37             |
| 8 ARG  | C   | -2.31           | 0.79             | 1.37            | 0.72            | 0.31             | 0.28             | -1.05             | -0.96             | -0.85             | -0.90             | -0.70            | 91 LYS  | CB  | 1.36            | -0.72            | -0.32           | -0.86           | 0.01             | -0.61            | -0.23             | -0.39             | -0.54             | -0.58             | -0.56            |
| 9 ARG  | O   | -1.87           | -0.98            | 0.51            | 0.50            | -0.81            | 0.50             | -0.22             | -0.29             | 0.01              | 0.05              | 0.30             | 92 LYS  | CG  | 1.32            | -0.22            | -0.48           | -0.49           | 0.23             | -0.67            | -0.21             | -0.37             | -0.45             | -0.45             | -0.40            |
| 10 ARG | CB  | 0.82            | -0.63            | -0.29           | -0.87           | -0.38            | -0.84            | -0.43             | -0.54             | -0.86             | -0.76             | 0.73             | 93 LYS  | CD  | 1.93            | -0.29            | -0.26           | -0.06           | 0.15             | -0.64            | -0.41             | -0.16             | -0.15             | -0.36             | -0.36            |
| 11 ARG | CG  | 0.83            | -0.49            | -0.40           | -0.60           | -0.32            | -1.08            | -0.63             | -0.44             | -0.61             | -0.58             | -0.61            | 94 LYS  | CE  | 1.55            | 0.25             | 0.21            | 0.00            | 0.26             | -0.37            | 0.09              | 0.13              | 0.02              | 0.11              | -0.03            |
| 12 ARG | CD  | 1.35            | -0.24            | -0.12           | -0.31           | -0.27            | -0.99            | -0.46             | -0.43             | -0.51             | -0.60             | -0.72            | 95 LYS  | NZ  | 1.91            | 0.87             | 1.42            | -0.01           | 1.01             | 1.00             | 1.07              | 1.08              | 0.90              | 0.77              | 0.85             |
| 13 ARG | NE  | 1.22            | 0.14             | 0.01            | -0.27           | -0.10            | -0.52            | -0.25             | -0.30             | -0.27             | -0.25             | -0.24            | 96 MET  | N   | 1.62            | 0.79             | -2.36           | -2.14           | 0.72             | 1.21             | 0.82              | 0.28              | 0.28              | 0.24              | 0.30             |
| 14 ARG | CZ  | 1.00            | -0.59            | 0.48            | 0.53            | -0.75            | -1.38            | -0.82             | -1.07             | -1.02             | -0.71             | -0.99            | 97 MET  | CA  | 1.24            | -0.67            | 0.06            | -1.04           | -0.92            | -0.87            | -0.93             | -0.91             | -0.87             | -0.93             | -0.83            |
| 15 ARG | NH1 | 1.07            | -0.10            | 0.09            | -0.31           | -0.05            | -0.31            | -0.08             | -0.09             | -0.07             | 0.10              | -0.04            | 98 MET  | C   | -2.03           | 0.40             | -0.96           | 0.32            | -0.51            | 0.18             | -0.96             | -1.01             | -1.04             | -1.03             | -0.84            |
| 16 ARG | NH2 | 1.02            | -0.24            | -0.20           | -0.23           | -0.03            | -0.14            | 0.00              | -0.07             | -0.02             | 0.10              | 0.03             | 99 MET  | O   | -2.24           | -1.14            | 0.11            | 0.53            | -1.06            | -0.67            | -0.87             | -0.53             | -0.29             | -0.16             | 0.09             |
| 17 ASN | N   | 1.62            | 0.37             | -2.68           | -1.85           | 0.64             | 1.16             | 0.61              | 0.15              | 0.46              | 0.50              | 0.66             | 100 MET | CB  | 0.79            | -0.94            | 0.25            | -1.12           | -0.93            | -1.02            | -1.08             | -1.02             | -1.36             | -1.22             | -1.21            |
| 18 ASN | CA  | 0.27            | -0.24            | 0.09            | -0.97           | -0.59            | -0.27            | -0.51             | -0.77             | -0.55             | -0.61             | -0.57            | 101 MET | CG  | 0.63            | -0.45            | -0.49           | -0.88           | -0.71            | -1.31            | -1.13             | -0.99             | -1.29             | -1.27             | -1.36            |
| 19 ASN | C   | -2.39           | 0.06             | 1.43            | 0.22            | -0.03            | 0.38             | -0.96             | -0.81             | -0.75             | -0.82             | -0.36            | 102 MET | SD  | 0.24            | -1.40            | -0.79           | 0.41            | -1.25            | -1.11            | -1.20             | -1.19             | -1.19             | -1.08             | -1.23            |
| 20 ASN | O   | -1.82           | -1.22            | 0.61            | 0.70            | -0.91            | 0.52             | -0.43             | -0.20             | 0.10              | 0.28              | 0.27             | 103 MET | CE  | 0.02            | -1.12            | -1.04           | -0.11           | -1.01            | -1.59            | -1.11             | -1.11             | -1.16             | -1.11             | -1.24            |
| 21 ASN | CB  | 0.69            | -0.46            | 0.09            | -0.71           | 0.00             | -0.75            | -0.41             | -0.55             | -0.50             | -0.65             | -0.45            | 104 PHE | N   | 1.12            | 0.72             | -2.13           | -2.29           | 0.54             | 1.28             | 0.22              | 0.26              | 0.25              | 0.25              | 0.13             |
| 22 ASN | CG  | 0.43            | -0.07            | -0.03           | -0.33           | -0.43            | -0.66            | -0.69             | -0.71             | -0.61             | -0.81             | -0.71            | 105 PHE | CA  | 0.74            | -0.52            | 1.13            | -1.31           | -1.14            | -0.76            | -0.74             | -0.92             | -0.92             | -0.93             | -0.94            |
| 23 ASN | CD1 | -0.91           | -0.34            | -0.33           | 0.27            | -0.32            | 0.41             | -0.03             | 0.03              | 0.13              | 0.27              | 0.21             | 106 PHE | C   | -2.09           | 1.16             | -0.35           | 0.38            | -0.34            | 0.72             | -0.88             | -1.11             | -0.94             | -0.66             | -0.68            |
| 24 ASN | ND2 | 0.44            | -0.19            | -0.38           | -0.56           | -0.04            | 0.06             | 0.02              | -0.06             | -0.07             | 0.05              | -0.11            | 107 PHE | O   | -2.29           | -1.34            | 0.42            | 0.32            | -1.11            | 0.49             | -0.58             | -0.56             | 0.07              | 0.01              | 0.12             |
| 25 ASP | N   | 1.98            | 0.68             | -2.71           | -1.62           | 0.42             | 1.49             | 0.65              | 0.50              | 0.65              | 0.48              | 0.85             | 108 PHE | CB  | 0.56            | -1.13            | -0.35           | -1.09           | -0.77            | -1.17            | -1.14             | -1.13             | -1.30             | -1.26             | -1.20            |
| 26 ASP | CA  | 0.92            | 0.63             | 0.65            | -0.74           | -0.83            | 0.66             | -0.27             | -0.38             | -0.37             | -0.28             | -0.28            | 109 PHE | CG  | 1.32            | -0.75            | 0.73            | 0.51            | -1.17            | -1.39            | -1.44             | -1.34             | -1.44             | -1.57             | -1.67            |
| 27 ASP | C   | -2.41           | 0.69             | 1.86            | 0.54            | 0.11             | 0.52             | -0.76             | -0.62             | -0.52             | -0.31             | -0.42            | 110 PHE | CD1 | 0.26            | -0.73            | -0.87           | -0.60           | -1.13            | -1.45            | -1.05             | -1.29             | -1.16             | -1.18             | -1.09            |
| 28 ASP | O   | -1.86           | -0.52            | 0.19            | 0.68            | -0.88            | 0.26             | -0.25             | -0.04             | 0.34              | 0.48              | 0.47             | 111 PHE | CD2 | 0.30            | -0.90            | -1.11           | -0.57           | -1.13            | -1.34            | -1.28             | -1.10             | -1.15             | -1.04             | -1.25            |
| 29 ASP | CB  | 0.64            | -0.19            | 0.74            | -0.44           | -0.14            | -0.15            | -0.29             | -0.30             | -0.47             | -0.39             | -0.18            | 112 PHE | CE1 | 0.29            | -0.91            | -0.92           | 0.04            | -1.30            | -1.44            | -1.16             | -1.15             | -0.96             | -1.05             | -1.04            |
| 30 ASP | CG  | 0.13            | 0.44             | 0.86            | 0.48            | -0.22            | 0.75             | -0.34             | -0.05             | -0.11             | 0.00              | -0.11            | 113 PHE | CE2 | 0.30            | -0.92            | -0.65           | -0.02           | -1.25            | -1.57            | -1.18             | -1.03             | -1.05             | -1.03             | -1.16            |
| 31 ASP | OD1 | -0.42           | 0.25             | 0.40            | 0.91            | 0.10             | 1.98             | 0.65              | 0.75              | 0.80              | 0.84              | 0.81             | 114 PHE | CZ  | 0.17            | -0.93            | -0.68           | 0.08            | -1.20            | -1.67            | -1.09             | -1.25             | -1.04             | -1.16             | -1.16            |
| 32 ASP | OD2 | -0.14           | -0.42            | 0.72            | 1.26            | 0.14             | 1.62             | 0.61              | 0.66              | 0.76              | 0.84              | 0.91             | 115 PRO | N   | 2.57            | 0.40             | -1.72           | -1.29           | 0.04             | 0.05             | -0.68             | -1.25             | -0.46             | -0.94             | -0.57            |
| 33 CYS | N   | 1.12            | 0.51             | -2.18           | -2.31           | 0.58             | 1.16             | 0.22              | 0.12              | -0.02             | 0.25              | 0.30             | 116 PRO | CA  | 0.50            | -0.92            | 0.32            | -0.89           | -0.60            | -0.77            | -0.70             | -0.64             | -0.46             | -0.62             | -0.63            |
| 34 CYS | CA  | 0.70            | -0.97            | -0.29           | -1.24           | -0.96            | -0.73            | -0.97             | -0.85             | -0.79             | -0.65             | -0.71            | 117 PRO | C   | -2.59           | 2.14             | 1.27            | 0.96            | -0.08            | 0.15             | -0.57             | -0.62             | -0.35             | -0.42             | -0.31            |
| 35 CYS | C   | -1.90           | 0.38             | -0.09           | 0.13            | -0.28            | -0.75            | -1.01             | -1.30             | -0.94             | -0.91             | 0.74             | 118 PRO | O   | -1.77           | -0.28            | 0.31            | 0.88            | -0.79            | 0.42             | -0.41             | -0.41             | 0.04              | -0.02             | 0.29             |
| 36 CYS | O   | -2.21           | -1.34            | 0.39            | 0.12            | -1.00            | -0.36            | -0.50             | -0.86             | -0.15             | -0.06             | 0.03             | 119 PRO | CB  | 0.32            | -0.13            | -0.46           | -0.20           | -0.37            | -0.92            | -0.52             | -0.61             | -0.71             | -0.76             | -0.63            |
| 37 CYS | CB  | 0.50            | -0.81            | -0.45           | -1.01           | -0.79            | -1.49            | -1.09             | -1.11             | -1.02             | -1.13             | -1.08            | 120 PRO | CG  | 0.58            | -0.35            | -0.05           | 0.14            | -0.44            | -1.08            | -0.59             | -0.58             | -0.67             | -0.79             | -0.74            |
| 38 CYS | SG  | 0.06            | -0.82            | -0.57           | -0.25           | -0.91            | -0.53            | -0.79             | -0.82             | -0.81             | -0.92             | -0.85            | 121 PRO | CD  | 0.82            | -0.17            | -1.45           | -1.06           | -0.33            | -1.45            | -0.58             | -0.84             | -0.58             | -0.73             | -0.57            |
| 39 GLN | N   | 2.28            | 1.09             | -2.53           | -1.86           | 1.05             | 1.81             | 0.55              | 0.69              | 0.80              | 0.29              | 0.69             | 122 SER | N   | 1.70            | 0.51             | -2.59           | -1.83           | 0.45             | 1.00             | 0.34              | 0.32              | 0.28              | 0.24              | 0.40             |
| 40 GLN | CA  | 1.07            | -0.46            | 0.92            | -0.94           | -0.74            | -0.45            | -0.53             | -0.66             | -0.59             | -0.57             | -0.85            | 123 SER | CA  | 0.82            | -0.12            | 0.79            | -0.97           | -0.42            | -0.85            | -0.76             | -0.79             | -0.71             | -0.78             | -0.62            |
| 41 GLN | C   | -2.38           | 1.43             | 1.45            | 0.52            | 0.53             | 1.39             | -1.05             | -0.74             | -0.56             | -0.70             | -0.44            | 124 SER | C   | -2.53           | 0.81             | 1.80            | 0.41            | 0.08             | -0.67            | -0.74             | -0.87             | -0.75             | -0.79             | -0.60            |
| 42 GLN | O   | -1.78           | -1.01            | 0.69            | 0.76            | 0.71             | 0.25             | -0.48             | -0.09             | -0.29             | 0.07              | 0.11             | 125 SER | O   | -1.85           | -1.11            | 0.27            | 0.24            | -0.90            | 0.55             | -0.33             | -0.09             | 0.10              | 0.25              | 0.33             |
| 43 GLN | CB  | 1.25            | -0.60            | 0.61            | -0.74           | -0.14            | -0.42            | -0.58             | -0.44             | -0.79             | -0.75             | -0.73            | 126 SER | CB  | 0.52            | -0.54            | 0.20            | -0.63           | -0.06            | -0.31            | -0.48             | -0.38             | -0.67             | -0.51             | -0.56            |
| 44 GLN | CG  | 1.31            | -0.25            | -0.07           | -0.59           | -0.02            | -0.85            | -0.47             | -0.29             | -0.59             | -0.66             | -0.51            | 127 SER | OG  | -0.60           | -0.73            | 0.23            | -0.35           | -0.32            | 1.13             | -0.21             | -0.01             | -0.06             | 0.05              | 0.14             |
| 45 GLN | CD  | 1.94            | -0.40            | -0.07           | 0.69            | -0.67            | -1.59            | -0.92             | -0.86             | -0.88             | -0.77             | -1.05            | 128 THR | N   | 1.33            | 0.59             | -2.26           | -1.89           | 0.62             | 2.70             | 0.56              | 0.72              | 0.49              | 0.58              | 0.49             |
| 46 GLN | OE1 | 0.03            | -0.70            | 0.32            | 0.43            | -0.14            | 0.16             | -0.28             | -0.25             | -0.16             | 0.05              | -0.06            | 129 THR | CA  | 0.94            | -0.52            | 0.62            | -1.28           | -0.66            | -0.09            | -0.67             | -0.48             | -0.39             | -0.50             | -0.40            |
| 47 GLN | NE2 | 0.68            | -0.13            | -0.05           | -0.14           | -0.21            | 0.16             | -0.11             | 0.02              | -0.19             | -0.10             | -0.21            | 130 THR | C   | -2.20           | 1.23             | 2.70            | 0.70            | 0.15             | 0.29             | -1.04             | -0.91             | -0.85             | -0.68             | -0.53            |
| 48 GLU | N   | 1.79            | 1.39             | -2.67           | -1.58           | 1.14             | 2.14             | 0.87              | 0.65              | 0.63              | 0.75              | 0.63             | 131 THR | O   | -1.92           | -1.26            | 0.82            | 0.51            | -0.82            | 0.13             | -0.43             | -0.23             | 0.14              | 0.35              | 0.40             |
| 49 GLU | CA  | 0.77            | -0.08            | 1.97            | -1.00           | -0.51            | 0.02             | -0.53             | -0.54             | -0.39             | -0.26             | -0.31            | 132 THR | CB  | 0.80            | -0.77            | 0.20            | -0.73           | -0.40            | -0.31            | -0.54             | -0.55             | -0.56             | -0.53             | -0.38            |
| 50 GLU | C   | -2.64           | 1.40             | 2.00            | 1.19            | 0.40             | 0.18             | -0.45             | -0.67             | -0.58             | -0.16             | -0.39            | 133 THR | OG1 | -0.23           | -0.52            | 0.17            | -0.32           | -0.47            | 0.89             | -0.13             | -0.18             | 0.01              | -0.09             | 0.16             |
| 51 GLU | O   | -1.70           | -0.71            | 0.52            | 0.91            | -0.63            | 0.84             | 0.03              |                   |                   |                   |                  |         |     |                 |                  |                 |                 |                  |                  |                   |                   |                   |                   |                  |

Table 3. (continued)

|        |     | 115<br>PRO<br>N | 116<br>PRO<br>CA | 117<br>PRO<br>C | 118<br>PRO<br>O | 119<br>PRO<br>CB | 120<br>PRO<br>CG | 121<br>PRO<br>CD |         |     | 115<br>PRO<br>N | 116<br>PRO<br>CA | 117<br>PRO<br>C | 118<br>PRO<br>O | 119<br>PRO<br>CB | 120<br>PRO<br>CG | 121<br>PRO<br>CD |
|--------|-----|-----------------|------------------|-----------------|-----------------|------------------|------------------|------------------|---------|-----|-----------------|------------------|-----------------|-----------------|------------------|------------------|------------------|
| 0 SAS  | SAS | 1.34            | 0.98             | 1.77            | 0.78            | 0.39             | 0.32             | 0.72             | 83 LEU  | CB  | 0.24            | -0.49            | 0.44            | -0.72           | -0.22            | -0.19            | 0.12             |
| 1 ALA  | N   | 1.95            | 0.79             | -2.48           | -1.74           | 0.19             | 0.44             | 1.09             | 84 LEU  | CG  | -0.17           | -0.18            | -0.02           | -0.90           | -0.35            | -0.24            | 0.03             |
| 2 ALA  | CA  | 0.48            | -0.15            | 0.80            | -0.24           | -0.14            | -0.33            | -0.14            | 85 LEU  | CD1 | -0.26           | -0.37            | -0.38           | 0.11            | -0.48            | -0.35            | -0.16            |
| 3 ALA  | C   | -1.36           | -0.03            | 0.85            | 1.11            | -0.33            | -0.44            | -1.38            | 86 LEU  | CD2 | -0.43           | -0.35            | -0.15           | 0.11            | -0.45            | -0.44            | -0.11            |
| 4 ALA  | O   | -1.16           | -0.56            | 0.84            | 0.96            | -0.06            | -0.10            | -0.88            | 87 LYS  | N   | 1.80            | 1.47             | -2.44           | -1.73           | 0.47             | 1.01             | 1.37             |
| 5 ALA  | CB  | 0.05            | -0.40            | -0.17           | -0.69           | -0.37            | -0.35            | -0.18            | 88 LYS  | CA  | 0.83            | -0.31            | 0.86            | -0.37           | -0.08            | -0.32            | 0.06             |
| 6 ARG  | N   | 1.63            | 1.81             | -2.36           | -1.68           | 0.34             | 1.24             | 1.28             | 89 LYS  | C   | -0.97           | 0.26             | 1.24            | 0.48            | -0.33            | -0.32            | -1.61            |
| 7 ARG  | CA  | 0.01            | -0.49            | 1.49            | -0.30           | 0.06             | -0.27            | 0.13             | 90 LYS  | O   | -1.46           | -0.81            | 0.83            | 1.05            | -0.04            | -0.09            | -1.09            |
| 8 ARG  | C   | -1.29           | 0.18             | 2.77            | 0.36            | -0.50            | -0.44            | -1.65            | 91 LYS  | CB  | 0.48            | -0.63            | 0.25            | -0.84           | 0.01             | 0.02             | 0.26             |
| 9 ARG  | O   | -1.39           | -0.67            | 1.88            | 1.13            | 0.10             | -0.18            | -1.08            | 92 LYS  | CG  | -0.09           | -0.27            | -0.39           | -0.79           | -0.21            | 0.07             | 0.41             |
| 10 ARG | CB  | 0.49            | -0.67            | 0.24            | -0.80           | -0.07            | -0.26            | 0.06             | 93 LYS  | CD  | 0.29            | -0.25            | 0.36            | -0.28           | 0.22             | 0.10             | 0.22             |
| 11 ARG | CG  | -0.08           | -0.55            | -0.40           | -0.88           | -0.39            | -0.19            | 0.13             | 94 LYS  | CE  | 0.78            | 0.21             | 0.46            | -0.36           | 0.18             | 0.31             | 0.61             |
| 12 ARG | CD  | 0.26            | -0.41            | -0.60           | -0.72           | -0.33            | -0.03            | -0.04            | 95 LYS  | NZ  | 1.03            | 0.59             | 0.54            | -0.17           | 0.95             | 0.89             | 0.88             |
| 13 ARG | NE  | -0.19           | -0.38            | -0.14           | -0.69           | -0.17            | -0.17            | 0.04             | 96 MET  | N   | 2.60            | 0.66             | -2.27           | -1.60           | 0.63             | 0.67             | 0.88             |
| 14 ARG | CZ  | -0.81           | -1.13            | -0.32           | 0.17            | -0.84            | -1.01            | -0.54            | 97 MET  | CA  | 0.82            | -0.54            | 1.27            | -0.51           | 0.13             | -0.46            | -0.31            |
| 15 ARG | NH1 | -0.27           | -0.66            | -0.50           | -0.73           | -0.24            | -0.15            | -0.18            | 98 MET  | C   | -1.67           | 0.26             | 2.01            | 0.34            | 0.11             | -0.49            | -1.46            |
| 16 ARG | NH2 | -0.22           | -0.43            | -0.50           | -0.61           | -0.16            | -0.27            | -0.27            | 99 MET  | O   | -1.55           | -0.91            | 0.89            | 0.94            | 0.27             | -0.11            | -1.00            |
| 17 ASN | N   | 2.22            | 0.94             | -2.69           | -1.55           | 0.29             | 0.60             | 1.03             | 100 MET | CB  | 0.45            | -0.42            | 0.70            | -0.67           | -0.23            | -0.18            | -0.16            |
| 18 ASN | CA  | 0.24            | -0.71            | 0.27            | -0.31           | -0.68            | -0.56            | -0.28            | 101 MET | CG  | -0.09           | -0.30            | -0.30           | -0.56           | -0.39            | -0.34            | 0.09             |
| 19 ASN | C   | -1.63           | 0.30             | 0.89            | 0.44            | -0.35            | -0.48            | -1.54            | 102 MET | SD  | -0.97           | -0.82            | -0.52           | 0.17            | -0.88            | -0.82            | -0.80            |
| 20 ASN | O   | -1.51           | -0.81            | 0.54            | 0.66            | -0.21            | -0.22            | -1.25            | 103 MET | CE  | -0.30           | -0.33            | -0.74           | -0.31           | -0.64            | -0.38            | -0.28            |
| 21 ASN | CB  | 0.37            | -0.33            | 0.28            | -0.72           | -0.16            | -0.03            | -0.01            | 104 PHE | N   | 2.54            | 0.44             | -2.63           | -1.76           | 0.27             | 0.54             | 0.78             |
| 22 ASN | CG  | -0.23           | -1.20            | 0.03            | -0.24           | -0.65            | -0.36            | -0.62            | 105 PHE | CA  | 0.38            | -0.94            | 2.11            | -0.28           | -0.16            | -0.38            | -0.20            |
| 23 ASN | OD1 | -0.38           | -0.96            | 0.02            | 0.26            | -0.44            | -0.16            | -0.16            | 106 PHE | C   | -1.72           | 0.30             | 1.27            | 0.30            | -0.47            | -0.08            | -1.49            |
| 24 ASN | ND2 | -0.41           | -0.58            | -0.50           | -0.52           | -0.17            | -0.09            | -0.08            | 107 PHE | O   | -1.28           | -0.90            | 0.95            | 0.90            | -0.16            | 0.19             | -1.04            |
| 25 ASP | N   | 1.81            | 1.38             | -2.85           | -1.48           | 0.18             | 0.93             | 1.21             | 108 PHE | CB  | 0.04            | -0.61            | -0.07           | -0.78           | -0.38            | -0.46            | -0.35            |
| 26 ASP | CA  | 0.19            | -0.41            | 1.15            | 0.26            | -0.29            | -0.34            | -0.41            | 109 PHE | CG  | 0.05            | -0.77            | 0.16            | 0.45            | -0.94            | -1.10            | -1.47            |
| 27 ASP | C   | -1.63           | 0.18             | 2.70            | 1.56            | -0.10            | -0.32            | -1.45            | 110 PHE | CD1 | -0.68           | -0.70            | -0.57           | -0.41           | -0.53            | -0.60            | -0.60            |
| 28 ASP | O   | -1.55           | -0.61            | 0.78            | 1.07            | -0.07            | -0.19            | -1.08            | 111 PHE | CD2 | -1.24           | -0.64            | -0.62           | -0.41           | -0.62            | -0.59            | -0.86            |
| 29 ASP | CB  | 0.03            | -0.24            | 0.52            | -0.25           | -0.44            | -0.28            | 0.20             | 112 PHE | CE1 | -0.45           | -0.46            | -0.34           | 0.02            | -0.71            | -0.68            | -0.58            |
| 30 ASP | CG  | -0.23           | -0.80            | 0.74            | 0.13            | -0.43            | -0.39            | -0.47            | 113 PHE | CE2 | -0.93           | -0.62            | -0.42           | -0.06           | -0.76            | -0.79            | -0.73            |
| 31 ASP | OD1 | -0.19           | -0.28            | 0.72            | 0.76            | -0.29            | 0.40             | 0.16             | 114 PHE | CZ  | -0.57           | -0.63            | -0.30           | 0.25            | -0.64            | -0.75            | -0.58            |
| 32 ASP | OD2 | 0.30            | -0.48            | 0.99            | 0.86            | 0.13             | 0.18             | 0.32             | 115 PRO | N   | 1.12            | -0.02            | -1.39           | -1.67           | 0.17             | -0.08            | 0.13             |
| 33 CYS | N   | 2.40            | 1.04             | -2.62           | -1.63           | 0.50             | 0.62             | 0.59             | 116 PRO | CA  | -0.03           | -0.68            | 1.39            | -0.73           | -0.05            | -0.23            | -0.29            |
| 34 CYS | CA  | 0.16            | -0.71            | -0.23           | -0.78           | -0.38            | -0.51            | -0.46            | 117 PRO | C   | -1.39           | 1.41             | -0.09           | 0.37            | 0.03             | 0.04             | -1.25            |
| 35 CYS | C   | -1.76           | 0.11             | -0.05           | 0.36            | -0.38            | -0.22            | -1.48            | 118 PRO | O   | -1.66           | -0.69            | 0.34            | 0.69            | -0.22            | -0.32            | -1.20            |
| 36 CYS | O   | -1.47           | -0.68            | 0.60            | 0.36            | -0.08            | -0.32            | -1.05            | 119 PRO | CB  | 0.15            | -0.04            | 0.05            | -0.27           | -0.06            | -0.21            | -0.10            |
| 37 CYS | CB  | 0.37            | -0.37            | -0.49           | -0.75           | -0.22            | -0.40            | -0.42            | 120 PRO | CG  | -0.06           | -0.21            | 0.06            | -0.38           | -0.21            | -0.34            | -0.15            |
| 38 CYS | SG  | -0.94           | -0.71            | -0.63           | -0.22           | -0.43            | -0.39            | -0.58            | 121 PRO | CD  | 0.16            | -0.28            | -1.21           | -1.23           | -0.11            | -0.16            | 0.17             |
| 39 GLN | N   | 2.41            | 1.14             | -2.69           | -1.97           | 0.68             | 0.93             | 1.15             | 122 SER | N   | 1.54            | 0.69             | -2.64           | -1.57           | 0.04             | 0.51             | 0.60             |
| 40 GLN | CA  | 1.23            | -0.54            | 0.29            | -0.05           | 0.06             | -0.37            | -0.26            | 123 SER | CA  | 0.67            | -0.54            | 0.63            | -0.30           | -0.35            | -0.46            | -0.32            |
| 41 GLN | C   | -1.10           | 0.02             | 0.64            | 0.42            | -0.56            | -0.42            | -1.71            | 124 SER | C   | -1.47           | -0.10            | 0.06            | 0.31            | -0.18            | -0.56            | -1.43            |
| 42 GLN | O   | -1.23           | -0.41            | 0.15            | 0.72            | 0.10             | -0.10            | -0.98            | 125 SER | O   | -1.54           | -0.72            | 0.39            | 0.92            | -0.21            | -0.25            | -1.08            |
| 43 GLN | CB  | 0.33            | -0.85            | 0.26            | -1.08           | -0.27            | -0.28            | -0.20            | 126 SER | CB  | -0.11           | -0.40            | -0.25           | -0.63           | -0.38            | -0.23            | -0.02            |
| 44 GLN | CG  | -0.23           | -0.49            | -0.21           | -0.88           | -0.32            | -0.03            | 0.05             | 127 SER | OG  | -0.26           | -0.60            | 0.14            | -0.39           | -0.36            | -0.20            | -0.35            |
| 45 GLN | CD  | -0.21           | -1.19            | 0.01            | 0.62            | -0.97            | -0.84            | -0.65            | 128 THR | N   | 2.29            | 0.82             | -2.61           | -1.54           | 0.47             | 1.00             | 1.09             |
| 46 GLN | OE1 | -0.04           | -0.89            | -0.16           | 0.12            | -0.34            | -0.33            | -0.28            | 129 THR | CA  | 0.27            | -1.09            | 1.24            | -0.40           | -0.31            | -0.37            | -0.02            |
| 47 GLN | NE2 | -0.40           | -0.49            | -0.07           | -0.40           | -0.31            | -0.15            | -0.20            | 130 THR | C   | -1.78           | 0.20             | 1.90            | 0.74            | -0.60            | -0.46            | -1.41            |
| 48 GLU | N   | 2.16            | 1.62             | -2.86           | -1.79           | 0.19             | 0.78             | 1.12             | 131 THR | O   | -1.33           | -0.82            | 0.72            | 0.88            | 0.03             | 0.02             | -0.95            |
| 49 GLU | CA  | 1.32            | -0.28            | 0.43            | -0.06           | 0.06             | -0.51            | -0.09            | 132 THR | CB  | 0.57            | -0.40            | 0.46            | -0.82           | -0.26            | -0.01            | -0.08            |
| 50 GLU | C   | -1.28           | 0.06             | 1.04            | 0.89            | -0.44            | -0.47            | -1.60            | 133 THR | OG1 | -0.31           | -0.56            | 0.21            | -0.55           | -0.39            | -0.14            | -0.19            |
| 51 GLU | O   | -1.29           | -0.30            | 1.05            | 1.38            | 0.05             | -0.20            | -1.06            | 134 THR | CG2 | -0.75           | -0.49            | -0.29           | -0.36           | -0.53            | -0.43            | -0.16            |
| 52 GLU | CB  | 0.46            | -0.33            | 0.67            | -0.89           | -0.54            | -0.23            | -0.07            | 135 TRP | N   | 2.20            | 1.76             | -2.61           | -1.57           | 0.10             | 0.16             | 0.86             |
| 53 GLU | CG  | -0.02           | -0.12            | 0.56            | -0.29           | -0.44            | -0.29            | -0.06            | 136 TRP | CA  | 0.07            | -0.80            | 2.23            | -0.38           | -0.68            | -0.67            | -0.37            |
| 54 GLU | CD  | 0.52            | -0.72            | 0.51            | 0.51            | -0.85            | -0.69            | -0.30            | 137 TRP | C   | -2.07           | 1.64             | 0.45            | 0.79            | 0.06             | -0.28            | -1.62            |
| 55 GLU | OE1 | 0.56            | -0.41            | 0.95            | 0.90            | -0.22            | 0.08             | 0.11             | 138 TRP | O   | -1.01           | -0.17            | 1.81            | 0.93            | 0.22             | -0.10            | -0.98            |
| 56 GLU | OE2 | 0.52            | -0.08            | 1.13            | 0.87            | -0.09            | 0.09             | 0.42             | 139 TRP | CB  | -0.10           | -0.61            | 0.24            | -0.79           | -0.62            | -0.82            | -0.47            |
| 57 GLY | N   | 0.68            | 0.05             | -2.18           | -1.43           | 0.21             | 0.41             | 0.45             | 140 TRP | CG  | -0.61           | -1.27            | -0.49           | 0.48            | -1.31            | -1.49            | -1.42            |
| 58 GLY | CA  | -0.07           | -0.49            | -0.32           | -0.59           | -0.33            | -0.29            | -0.27            | 141 TRP | CD1 | -1.25           | -0.93            | -0.70           | -0.79           | -0.74            | -0.96            | -0.95            |
| 59 GLY | C   | -1.00           | -0.35            | 0.19            | 0.28            | -0.64            | -0.47            | -1.17            | 142 TRP | CD2 | -1.13           | -1.44            | -0.05           | 1.09            | -1.48            | -1.54            | -1.75            |
| 60 GLY | O   | -1.58           | -0.93            | 0.36            | 0.80            | -0.19            | -0.28            | -1.20            | 143 TRP | NE1 | -0.87           | -0.67            | -0.54           | -1.14           | -0.53            | -0.73            | -0.98            |
| 61 HIS | N   | 2.86            | 0.45             | -2.91           | -1.50           | 0.26             | 0.72             | 0.96             | 144 TRP | CE2 | -1.38           | -1.55            | 0.49            | 0.92            | -1.50            | -1.30            | -1.80            |
| 62 HIS | CA  | 2.35            | -0.39            | 0.15            | -0.50           | 0.16             | -0.32            | -0.24            | 145 TRP | CE3 | -1.45           | -0.71            | -0.61           | 0.21            | -1.02            | -0.95            | -0.95            |
| 63 HIS | C   | -1.68           | 0.27             | 1.80            | 0.42            | 0.04             | -0.07            | -1.68            | 146 TRP | CZ2 | -0.95           | -1.09            | -0.59           | -0.51           | -0.70            | -1.08            | -1.20            |
| 64 HIS | O   | -1.34           | -0.73            | -0.09           | 0.72            | -0.06            | 0.04             | -1.01            | 147 TRP | CZ3 | -1.15           | -0.71            | -0.71           | 0.20            | -0.96            | -0.97            | -1.09            |
| 65 HIS | CB  | 0.49            | -0.56            | 0.23            | -0.70           | -0.21            | -0.42            | -0.30            | 148 TRP | CH2 | -0.65           | -0.66            | -0.59           | 0.02            | -0.88            | -1.02            | -0.98            |
| 66 HIS | CG  | -0.20           | -0.94            | 0.72            | -0.25           | -1.10            | -1.09            | -1.03            | 149 TYR | N   | 2.85            | 0.96             | -2.72           | -1.78           | 0.20             | 0.59             | 1.11             |
| 67 HIS | ND1 | -0.26           | -0.85            | -0.29           | -0.62           | -0.43            | -0.27            | -0.03            | 150 TYR | CA  | 0.12            | -0.82            | 0.21            | -0.59           | -0.02            | -0.33            | -0.21            |
| 68 HIS | CD2 | -0.72           | -0.59            | -0.63           | -0.66           | -0.50            | -0.52            | -0.48            | 151 TYR | C   | -1.59           | 0.49             | 2.22            | 0.44            | -0.58            | -0.37            | -1.64            |
| 69 HIS | CE1 | -0.12           | -0.76            | -0.41           | -0.54           | -0.74            | -0.59            | -0.51            | 152 TYR | O   | -1.35           | -0.93            | 0.49            | 0.46            | -0.07            | 0.07             | -1.06            |
| 70 HIS | NE2 | -0.32           | -0.44            | -0.24           | -0.71           | -0.52            | -0.33            | -0.35            | 153 TYR | CB  | 0.06            | -0.38            | 0.16            | -0.82           | -0.38            | -0.55            | -0.43            |
| 71 ILE | N   | 2.68            | 1.27             | -2.35           | -1.79           | 0.79             | 0.93             | 0.94             | 154 TYR | CG  | -0.90           | -1.68            | 0.47            | 0.46            | -1.22            | -1.45            | -1.67            |
| 72 ILE | CA  | 1.67            | -0.37            | 1.43            | -0.47           | -0.06            | -0.30            | -0.30            | 155 TYR | CD1 | -1.33           | -1.04            | -0.89           | -0.54           | -0.67            | -0.84            | -0.92            |
| 73 ILE | C   | -1.88           | 0.72             | 1.50            | 1.04            | -0.26            | 0.04             | -1.68            | 156 TYR | CD2 | -1.50           | -1.15            | -0.91           | -0.64           | -0.78            | -0.78            | -1.01            |
| 74 ILE | O   | -1.14           | -0.71            | 0.91            | 0.82            | 0.23             | 0.27             | -0.89            | 157 TYR | CE1 | -1.25           | -0.98            | -0.63           | -0.48           | -0.96            | -1.05            | -1.04            |

Table 3. (continued)

|    |         | 122<br>SER<br>N | 123<br>SER<br>CA | 124<br>SER<br>C | 125<br>SER<br>O | 126<br>SER<br>CB | 127<br>SER<br>OG |     |         | 122<br>SER<br>N | 123<br>SER<br>CA | 124<br>SER<br>C | 125<br>SER<br>O | 126<br>SER<br>CB | 127<br>SER<br>OG |
|----|---------|-----------------|------------------|-----------------|-----------------|------------------|------------------|-----|---------|-----------------|------------------|-----------------|-----------------|------------------|------------------|
| 0  | SAS SAS | 1.63            | 0.94             | 2.00            | 0.92            | 0.53             | 0.55             | 83  | LEU CB  | 0.82            | -0.73            | 0.46            | -0.84           | -0.26            | -0.21            |
| 1  | ALA N   | 1.60            | 0.46             | -2.38           | -1.80           | 0.19             | -0.63            | 84  | LEU CG  | 0.65            | -0.28            | -0.32           | -0.93           | -0.32            | -0.13            |
| 2  | ALA CA  | 0.84            | -0.38            | 0.36            | -0.45           | -0.48            | -0.46            | 85  | LEU CD1 | 0.53            | -0.63            | -0.64           | 0.09            | -0.38            | 0.11             |
| 3  | ALA C   | -2.16           | 0.37             | 2.14            | 0.87            | 0.00             | 0.39             | 86  | LEU CD2 | 0.63            | -0.47            | -0.55           | 0.21            | -0.43            | 0.09             |
| 4  | ALA O   | -1.74           | -0.47            | 1.13            | 0.79            | -0.69            | -0.43            | 87  | LYS N   | 1.14            | 0.65             | -2.54           | -1.88           | 0.73             | -0.53            |
| 5  | ALA CB  | 0.33            | -0.62            | -0.10           | -0.67           | -0.23            | -0.25            | 88  | LYS CA  | 1.08            | -0.43            | 0.57            | -0.32           | -0.53            | -0.48            |
| 6  | ARG N   | 1.47            | 0.83             | -2.44           | -1.90           | 0.73             | -0.65            | 89  | LYS C   | -2.23           | 0.74             | 2.10            | 0.82            | 0.04             | 0.16             |
| 7  | ARG CA  | 1.12            | -0.39            | 0.87            | -0.63           | -0.35            | -0.55            | 90  | LYS O   | -1.76           | -0.67            | 0.56            | 0.74            | -0.53            | -0.17            |
| 8  | ARG C   | -2.18           | 1.21             | 2.98            | 0.62            | -0.01            | 0.28             | 91  | LYS CB  | 0.54            | -0.81            | 0.38            | -0.89           | -0.12            | -0.63            |
| 9  | ARG O   | -1.69           | -0.44            | 1.06            | 0.52            | -0.50            | -0.21            | 92  | LYS CG  | 0.86            | -0.17            | 0.27            | -0.77           | -0.14            | -0.17            |
| 10 | ARG CB  | 0.62            | -0.55            | 0.02            | -0.92           | -0.19            | -0.63            | 93  | LYS CD  | 1.28            | -0.69            | -0.01           | -0.08           | 0.00             | -0.22            |
| 11 | ARG CG  | 0.46            | -0.42            | -0.49           | -0.88           | -0.36            | -0.40            | 94  | LYS CE  | 1.20            | -0.19            | -0.05           | -0.23           | 0.06             | -0.24            |
| 12 | ARG CD  | 0.72            | -0.34            | -0.41           | -0.54           | -0.11            | -0.47            | 95  | LYS NZ  | 1.04            | 0.21             | 0.40            | -0.25           | 0.51             | -0.10            |
| 13 | ARG NE  | 1.26            | -0.34            | -0.24           | -0.61           | -0.03            | -0.43            | 96  | MET N   | 1.69            | 0.89             | -2.31           | -1.82           | 0.55             | -0.41            |
| 14 | ARG CZ  | 0.67            | -0.90            | -0.69           | 0.27            | -0.38            | 0.07             | 97  | MET CA  | 0.93            | -0.59            | 0.70            | -0.49           | -0.40            | -0.34            |
| 15 | ARG NH1 | 0.41            | -0.55            | -0.70           | -0.52           | -0.24            | -0.36            | 98  | MET C   | -2.14           | 0.29             | 2.21            | 0.57            | 0.03             | 0.06             |
| 16 | ARG NH2 | 0.70            | -0.41            | -0.22           | -0.40           | -0.11            | -0.21            | 99  | MET O   | -1.61           | -0.79            | 0.62            | 0.63            | -0.57            | -0.16            |
| 17 | ASN N   | 1.82            | 0.78             | -2.43           | -1.90           | 0.43             | -0.85            | 100 | MET CB  | 0.44            | -0.73            | 0.08            | -0.89           | -0.27            | -0.41            |
| 18 | ASN CA  | 0.21            | -0.64            | 0.25            | -0.69           | -0.66            | -0.72            | 101 | MET CG  | 0.59            | -0.34            | -0.15           | -0.57           | -0.14            | -0.23            |
| 19 | ASN C   | -2.26           | 0.36             | 1.32            | -0.04           | -0.22            | -0.02            | 102 | MET SD  | 0.14            | -0.93            | -0.35           | 0.57            | -0.45            | 0.33             |
| 20 | ASN O   | -1.75           | -0.57            | 0.44            | 0.59            | -0.72            | -0.44            | 103 | MET CE  | 0.12            | -0.55            | -0.60           | 0.06            | -0.39            | -0.14            |
| 21 | ASN CB  | 0.26            | -0.58            | -0.23           | -0.93           | -0.27            | -0.81            | 104 | PHE N   | 1.69            | 0.79             | -2.56           | -1.84           | 0.49             | -0.59            |
| 22 | ASN CG  | 0.05            | -0.31            | 0.05            | -0.29           | -0.41            | -0.41            | 105 | PHE CA  | 0.52            | -0.13            | 0.83            | -1.07           | -0.56            | -0.74            |
| 23 | ASN OD1 | -1.04           | -0.70            | 0.03            | 0.24            | -0.44            | -0.53            | 106 | PHE C   | -2.56           | 0.81             | 1.80            | 0.25            | 0.22             | 0.25             |
| 24 | ASN ND2 | -0.02           | -0.60            | -0.32           | -0.59           | -0.28            | -0.61            | 107 | PHE O   | -1.83           | -0.99            | 0.43            | 0.25            | -0.63            | -0.32            |
| 25 | ASP N   | 1.82            | 0.59             | -2.66           | -1.79           | 0.18             | -1.02            | 108 | PHE CB  | 0.46            | -0.42            | 0.08            | -0.90           | -0.07            | -0.32            |
| 26 | ASP CA  | 0.64            | -0.60            | 0.54            | -0.28           | -0.67            | -0.63            | 109 | PHE CG  | 1.03            | -0.86            | -0.65           | 0.57            | -0.33            | 1.14             |
| 27 | ASP C   | -2.61           | 0.42             | 0.95            | 0.44            | -0.02            | 0.08             | 110 | PHE CD1 | 0.36            | -0.76            | -0.73           | -0.34           | -0.49            | -0.22            |
| 28 | ASP O   | -1.87           | -0.61            | 0.71            | 0.77            | -0.68            | -0.39            | 111 | PHE CD2 | 0.34            | -0.79            | -0.87           | -0.10           | -0.39            | -0.03            |
| 29 | ASP CB  | -0.01           | -0.43            | 0.30            | -0.65           | -0.30            | -0.75            | 112 | PHE CE1 | 0.31            | -0.70            | -0.75           | 0.06            | -0.68            | -0.08            |
| 30 | ASP CG  | -0.69           | -0.65            | 0.57            | -0.54           | -0.81            | -0.90            | 113 | PHE CE2 | 0.27            | -0.77            | -0.78           | 0.23            | -0.51            | 0.03             |
| 31 | ASP OD1 | -1.54           | -0.44            | 0.39            | 0.62            | -0.72            | -1.09            | 114 | PHE CZ  | 0.43            | -0.61            | -0.59           | 0.29            | -0.56            | 0.12             |
| 32 | ASP OD2 | -0.93           | -0.47            | 0.42            | 0.87            | -0.60            | -0.95            | 115 | PRO N   | 1.57            | 0.71             | -1.47           | -1.55           | -0.12            | -0.24            |
| 33 | CYS N   | 1.16            | 0.53             | -2.19           | -1.79           | 0.37             | -0.39            | 116 | PRO CA  | 0.69            | -0.54            | -0.08           | -0.75           | -0.40            | -0.61            |
| 34 | CYS CA  | 0.71            | -0.53            | 1.33            | -0.98           | -0.38            | -0.65            | 117 | PRO C   | -2.62           | 0.64             | 0.06            | 0.41            | -0.27            | 0.16             |
| 35 | CYS C   | -2.42           | 1.44             | 0.57            | -0.07           | 0.29             | -0.18            | 118 | PRO O   | -1.58           | -0.29            | 0.30            | 0.92            | -0.63            | -0.37            |
| 36 | CYS O   | -1.68           | -0.97            | 0.83            | 0.33            | -0.44            | -0.18            | 119 | PRO CB  | 0.06            | -0.34            | -0.15           | -0.26           | -0.37            | -0.40            |
| 37 | CYS CB  | 0.30            | -0.42            | -0.64           | -0.81           | -0.16            | -0.38            | 120 | PRO CG  | 0.54            | -0.44            | -0.54           | -0.32           | -0.22            | -0.23            |
| 38 | CYS SG  | -0.39           | -0.58            | -0.89           | -0.14           | -0.61            | 0.22             | 121 | PRO CD  | 0.62            | -0.30            | -1.39           | -1.12           | -0.02            | -0.34            |
| 39 | GLN N   | 1.65            | 0.80             | -2.44           | -1.98           | 0.51             | -0.64            | 122 | SER N   | 0.99            | 0.48             | -2.36           | -1.69           | 0.17             | -0.73            |
| 40 | GLN CA  | 0.79            | -0.48            | 1.47            | -0.74           | -0.59            | -0.42            | 123 | SER CA  | 0.51            | -0.48            | -0.23           | -0.75           | -0.52            | -0.50            |
| 41 | GLN C   | -2.22           | 0.73             | 0.37            | 0.73            | -0.04            | 0.14             | 124 | SER C   | -2.33           | -0.24            | 1.93            | 0.61            | 0.11             | 0.19             |
| 42 | GLN O   | -1.69           | -0.58            | 0.95            | 0.42            | -0.60            | -0.22            | 125 | SER O   | -1.70           | -0.78            | 0.61            | 0.43            | -0.53            | -0.42            |
| 43 | GLN CB  | 0.08            | -0.70            | 0.23            | -1.04           | -0.25            | -0.58            | 126 | SER CB  | 0.19            | -0.51            | 0.12            | -0.54           | -0.38            | -0.47            |
| 44 | GLN CG  | 0.61            | -0.44            | -0.49           | -0.90           | -0.23            | -0.52            | 127 | SER OG  | -0.74           | -0.49            | 0.18            | -0.45           | -0.44            | -0.72            |
| 45 | GLN CD  | 0.53            | -0.80            | 0.04            | 0.00            | -0.50            | -0.15            | 128 | THR N   | 1.17            | 0.72             | -2.48           | -1.82           | 0.15             | -1.00            |
| 46 | GLN OE1 | -0.61           | -0.62            | 0.02            | 0.21            | -0.29            | -0.36            | 129 | THR CA  | 0.66            | -0.85            | 0.42            | -0.81           | -0.60            | -0.55            |
| 47 | GLN NE2 | 0.40            | -0.61            | -0.34           | -0.49           | -0.25            | -0.48            | 130 | THR C   | -2.28           | 0.22             | 1.40            | 0.67            | -0.16            | -0.13            |
| 48 | GLU N   | 1.23            | 1.42             | -2.71           | -1.86           | 0.37             | -0.99            | 131 | THR O   | -1.74           | -0.78            | 0.60            | 0.55            | -0.50            | -0.27            |
| 49 | GLU CA  | 1.13            | -0.37            | 1.44            | -0.34           | -0.58            | -0.40            | 132 | THR CB  | -0.26           | -0.90            | -0.10           | -0.85           | -0.53            | -0.75            |
| 50 | GLU C   | -2.25           | 1.13             | 2.82            | 0.74            | 0.28             | 0.72             | 133 | THR OG1 | -0.70           | -0.56            | -0.03           | -0.39           | -0.56            | -0.84            |
| 51 | GLU O   | -1.76           | -0.15            | 1.28            | 0.81            | -0.64            | -0.36            | 134 | THR CG2 | 0.36            | -0.40            | -0.33           | -0.13           | -0.43            | -0.26            |
| 52 | GLU CB  | -0.25           | -0.48            | 0.89            | -0.84           | -0.24            | -0.78            | 135 | TRP N   | 1.32            | 0.25             | -2.56           | -1.89           | 0.60             | -0.32            |
| 53 | GLU CG  | 0.68            | 0.08             | 0.52            | -0.28           | -0.38            | -0.70            | 136 | TRP CA  | 0.80            | -0.20            | 0.14            | -1.06           | -0.23            | -0.37            |
| 54 | GLU CD  | -0.01           | -0.39            | 0.34            | 0.74            | -0.67            | -0.51            | 137 | TRP C   | -2.44           | 1.85             | 3.28            | 0.46            | 0.30             | 0.59             |
| 55 | GLU OE1 | -0.74           | -0.41            | 0.55            | 1.20            | -0.27            | -0.60            | 138 | TRP O   | -1.96           | -0.94            | 0.06            | 0.32            | -0.56            | -0.17            |
| 56 | GLU OE2 | -0.29           | -0.13            | 1.14            | 1.21            | -0.37            | -0.61            | 139 | TRP CB  | 0.41            | -0.55            | 0.14            | -0.65           | -0.25            | -0.07            |
| 57 | GLY N   | 1.05            | -0.08            | -2.30           | -1.69           | 0.11             | -0.72            | 140 | TRP CG  | 0.54            | -0.83            | -0.22           | 0.73            | -0.38            | 0.63             |
| 58 | GLY CA  | 0.41            | -0.48            | -0.25           | -0.77           | -0.30            | -0.51            | 141 | TRP CD1 | 0.30            | -0.75            | -0.93           | -0.46           | -0.50            | -0.31            |
| 59 | GLY C   | -1.77           | -0.17            | 0.72            | 0.01            | -0.37            | -0.28            | 142 | TRP CD2 | 0.48            | -0.99            | -0.03           | 0.61            | -0.78            | 0.90             |
| 60 | GLY O   | -1.55           | -0.89            | 0.40            | 0.42            | -0.58            | -0.39            | 143 | TRP NE1 | 0.33            | -0.42            | -0.44           | -0.46           | -0.51            | -0.85            |
| 61 | HIS N   | 1.55            | 1.01             | -2.44           | -1.82           | 0.35             | -0.69            | 144 | TRP CE2 | 0.19            | -0.70            | -0.70           | 0.67            | -0.98            | 0.49             |
| 62 | HIS CA  | 0.31            | -0.44            | 0.65            | -0.74           | -0.58            | -0.82            | 145 | TRP CE3 | 0.33            | -0.89            | -0.99           | 0.07            | -0.40            | 0.45             |
| 63 | HIS C   | -2.13           | 0.70             | 2.94            | -0.12           | 0.24             | 0.04             | 146 | TRP CZ2 | 0.07            | -0.88            | -0.87           | -0.05           | -0.63            | -0.14            |
| 64 | HIS O   | -1.78           | -0.75            | 0.87            | 0.37            | -0.53            | -0.36            | 147 | TRP CZ3 | -0.13           | -0.96            | -1.11           | 0.18            | -0.65            | 0.41             |
| 65 | HIS CB  | 0.27            | -0.36            | -0.23           | -0.77           | -0.10            | -0.58            | 148 | TRP CH2 | -0.08           | -0.67            | -1.10           | 0.09            | -0.72            | 0.06             |
| 66 | HIS CG  | 1.41            | -0.40            | 0.60            | 0.23            | -0.40            | 0.11             | 149 | TYR N   | 1.36            | 1.05             | -2.52           | -1.91           | 0.39             | -0.74            |
| 67 | HIS ND1 | -0.46           | -0.39            | -0.40           | -0.31           | -0.59            | -1.01            | 150 | TYR CA  | 0.90            | -0.42            | 1.16            | -0.99           | -0.34            | -0.51            |
| 68 | HIS CD2 | 0.41            | -0.42            | -0.65           | -0.44           | -0.36            | -0.48            | 151 | TYR C   | -2.45           | 0.64             | 1.45            | 0.55            | -0.14            | 0.01             |
| 69 | HIS CE1 | 0.50            | -0.72            | -0.36           | -0.55           | -0.70            | -0.52            | 152 | TYR O   | -1.92           | -0.95            | 0.70            | 0.39            | -0.58            | -0.55            |
| 70 | HIS NE2 | 0.07            | -0.45            | -0.03           | -0.35           | -0.65            | -0.95            | 153 | TYR CB  | 0.26            | -0.61            | 0.29            | -0.90           | -0.27            | -0.37            |
| 71 | ILE N   | 1.77            | 0.84             | -2.49           | -1.80           | 0.86             | -0.25            | 154 | TYR CG  | 1.15            | -1.01            | 0.15            | 0.51            | -0.45            | 0.58             |
| 72 | ILE CA  | 1.59            | 0.06             | 1.35            | -0.94           | -0.62            | -0.53            | 155 | TYR CD1 | 0.30            | -0.64            | -1.26           | -0.47           | -0.48            | -0.13            |
| 73 | ILE C   | -2.66           | 1.02             | 1.25            | 0.90            | 0.19             | 0.44             | 156 | TYR CD2 | 0.08            | -0.51            | -0.67           | -0.28           | -0.36            | 0.07             |
| 74 | ILE O   | -1.82           | -0.95            | 0.77            | 0.36            | -0.58            | -0.33            | 157 | TYR CE1 | 0.24            | -0.66            | -0.63           | -0.20           | -0.71            | -0.19            |
| 75 | ILE CB  | 0.55            | -0.79            | 0.04            | -0.98           | -0.46            | -0.22            | 158 | TYR CE2 | 0.28            | -0.67            | -0.42           | -0.01           | -0.59            | -0.05            |
| 76 | ILE CG1 | 0.70            | -0.53            | -0.49           | -0.58           | -0.28            | 0.10             | 159 | TYR CZ  | 0.06            | -0.84            | 0.04            | 0.89            | -0.89            | 0.53             |
| 77 | ILE CG2 | 0.29            | -0.21            | -0.48           | -0.01           | -0.42            | -0.06            | 160 | TYR OH  | -0.13           | -0.69            | -0.25           | 0.03            | -0.43            | -0.26            |
| 78 | ILE CD1 | 0.54            | -0.69            | -0.56           | 0.21            | -0.41            | 0.19             | 161 | VAL N   | 1.52            | 1.14             | -2.28           | -1.78           | 0.72             | -0.54            |
| 79 | LEU N   | 1.90            | 0.84             | -2.49           | -1.83           | 0.72             | -0.26            | 162 | VAL CA  | 1.14            | 0.12             | 1.65            | -1.06           | -0.54            | -0.46            |
| 80 | LEU CA  | 1.12            | 0.22             | 1.30            | -0.82           | -0.62            | -0.65            | 163 | VAL C   | -2.45           | 1.03             | 3.08            | 0.45            | -0.16            | 0.64             |
| 81 | LEU C   | -2.53           | 0.95             | 2.82            | 0.70            | 0.09             | 0.41             | 164 | VAL O   | -1.78           | -0.99            | 0.71            | 0.36            | -0.52            | -0.28            |
| 82 | LEU O   | -1.73           | -0.70            | 0.99            | 0.61            | -0.55            | -0.27            | 165 | VAL CB  | 0.52            | -0.79            | 0.36            | -0.85           | -0.28            | -0.35            |
|    |         |                 |                  |                 |                 |                  |                  | 166 | VAL CG1 | 0.23            | -0.39            | -0.43           | -0.02           | -0.45            | -0.02            |
|    |         |                 |                  |                 |                 |                  |                  | 167 | VAL CG2 | 0.60            | -0.47            | -0.27           | -0.25           | -0               |                  |

Table 3. (continued)

|    |         | 128<br>THR<br>N | 129<br>THR<br>CA | 130<br>THR<br>C | 131<br>THR<br>O | 132<br>THR<br>CB | 133<br>THR<br>OG1 | 134<br>THR<br>CG2 |     |         | 128<br>THR<br>N | 129<br>THR<br>CA | 130<br>THR<br>C | 131<br>THR<br>O | 132<br>THR<br>CB | 133<br>THR<br>OG1 | 134<br>THR<br>CG2 |
|----|---------|-----------------|------------------|-----------------|-----------------|------------------|-------------------|-------------------|-----|---------|-----------------|------------------|-----------------|-----------------|------------------|-------------------|-------------------|
| 0  | SAS SAS | 1.96            | 1.30             | 1.95            | 1.07            | 0.93             | 0.66              | 0.61              | 83  | LEU CB  | 0.75            | -0.90            | 0.33            | -0.96           | -0.49            | -0.26             | -0.50             |
| 1  | ALA N   | 1.85            | 0.87             | -2.46           | -1.82           | 0.19             | -0.43             | 0.40              | 84  | LEU CG  | 0.92            | -0.27            | -0.39           | -1.32           | -0.17            | 0.09              | -0.76             |
| 2  | ALA CA  | 1.11            | -0.18            | 0.74            | -0.53           | -0.71            | -0.52             | -0.42             | 85  | LEU CD1 | 0.71            | -0.72            | -0.70           | 0.03            | -0.43            | -0.02             | -0.78             |
| 3  | ALA C   | -2.19           | 1.28             | 1.95            | 0.67            | -0.03            | 0.32              | -0.56             | 86  | LEU CD2 | 0.81            | -0.54            | -0.53           | 0.14            | -0.39            | 0.03              | -0.76             |
| 4  | ALA O   | -1.71           | -0.79            | 0.93            | 0.71            | -0.81            | -0.43             | -0.10             | 87  | LYS N   | 1.29            | 0.59             | -2.56           | -1.87           | 0.27             | -0.60             | 0.63              |
| 5  | ALA CB  | 0.56            | -0.69            | -0.37           | -0.63           | -0.27            | -0.19             | -0.47             | 88  | LYS CA  | 1.32            | -0.93            | 0.83            | -0.70           | -0.62            | -0.44             | -0.13             |
| 6  | ARG N   | 1.05            | 0.81             | -2.46           | -1.96           | 0.44             | -0.50             | 0.41              | 89  | LYS C   | -2.29           | 0.64             | 2.40            | 0.87            | 0.48             | 0.21              | -0.40             |
| 7  | ARG CA  | 0.86            | -0.82            | 0.32            | -0.81           | -0.70            | -0.53             | -0.33             | 90  | LYS O   | -1.82           | -0.74            | 0.82            | 0.68            | -0.75            | -0.41             | -0.12             |
| 8  | ARG C   | -2.28           | 0.43             | 0.45            | 0.68            | 0.07             | 0.65              | -0.44             | 91  | LYS CB  | 0.68            | -0.60            | -0.04           | -0.77           | -0.39            | -0.53             | -0.22             |
| 9  | ARG O   | -1.84           | -1.08            | 0.68            | 0.61            | -0.83            | -0.33             | -0.21             | 92  | LYS CG  | 0.66            | -0.36            | -0.25           | -0.79           | -0.33            | -0.43             | -0.49             |
| 10 | ARG CB  | 0.51            | -1.03            | -0.23           | -1.07           | -0.36            | -0.67             | -0.37             | 93  | LYS CD  | 1.21            | -0.45            | -0.10           | -0.01           | -0.12            | -0.22             | -0.25             |
| 11 | ARG CG  | 0.89            | -0.40            | -0.50           | -0.71           | -0.47            | -0.57             | -0.46             | 94  | LYS CE  | 1.20            | -0.13            | -0.17           | -0.21           | 0.02             | -0.33             | -0.29             |
| 12 | ARG CD  | 1.04            | -0.63            | -0.20           | -0.19           | -0.14            | -0.54             | -0.31             | 95  | LYS NZ  | 1.20            | 0.65             | 0.64            | -0.10           | 0.76             | -0.13             | 0.32              |
| 13 | ARG NE  | 0.75            | -0.15            | -0.20           | -0.41           | -0.13            | -0.51             | -0.16             | 96  | MET N   | 1.64            | 0.71             | -2.39           | -1.94           | 0.95             | -0.23             | 0.71              |
| 14 | ARG CZ  | 1.75            | -0.55            | -0.20           | 0.44            | -0.50            | 0.32              | -0.79             | 97  | MET CA  | 0.94            | -0.96            | -0.05           | -0.63           | -0.55            | -0.42             | -0.06             |
| 15 | ARG NH1 | 0.53            | -0.50            | -0.43           | -0.41           | -0.02            | -0.26             | -0.29             | 98  | MET C   | -2.19           | 0.20             | 3.84            | 0.92            | 0.31             | 0.68              | -0.53             |
| 16 | ARG NH2 | 0.67            | -0.37            | -0.26           | -0.30           | 0.03             | -0.13             | -0.18             | 99  | MET O   | -1.74           | -0.94            | 1.38            | 0.45            | -0.70            | -0.34             | -0.21             |
| 17 | ASN N   | 1.75            | 0.53             | -2.54           | -1.99           | 0.52             | -0.70             | 0.46              | 100 | MET CB  | 0.43            | -0.95            | 0.23            | -1.02           | 0.01             | -0.30             | -0.31             |
| 18 | ASN CA  | 0.50            | -0.67            | 0.57            | -0.96           | -1.01            | -0.71             | -0.78             | 101 | MET CG  | 0.54            | -0.55            | -0.70           | -0.86           | -0.21            | -0.46             | -0.63             |
| 19 | ASN C   | -2.18           | 0.29             | 0.84            | 0.08            | -0.12            | 0.09              | -0.49             | 102 | MET SD  | 0.20            | -0.95            | -0.83           | 0.56            | -0.32            | 0.18              | -0.75             |
| 20 | ASN O   | -1.80           | -0.78            | 0.63            | 0.56            | -0.61            | -0.44             | -0.30             | 103 | MET CE  | 0.33            | -0.69            | -0.74           | -0.19           | -0.27            | -0.11             | -0.78             |
| 21 | ASN CB  | 0.46            | -0.68            | -0.04           | -0.91           | -0.48            | -0.78             | -0.51             | 104 | PHE N   | 1.32            | 0.93             | -2.24           | -1.91           | 0.78             | -0.23             | 0.47              |
| 22 | ASN CG  | 0.18            | -0.53            | -0.08           | -0.90           | -0.45            | -0.60             | -0.74             | 105 | PHE CA  | 0.61            | -0.53            | 1.18            | -1.23           | -0.78            | -0.51             | -0.28             |
| 23 | ASN OD1 | -1.18           | -0.50            | 0.06            | 0.16            | -0.77            | -0.60             | -0.31             | 106 | PHE C   | -2.23           | 0.63             | 2.70            | 0.80            | 0.22             | 0.18              | -0.60             |
| 24 | ASN ND2 | 0.00            | -0.42            | -0.23           | -0.48           | -0.49            | -0.73             | -0.47             | 107 | PHE O   | -1.89           | -1.31            | 0.71            | 0.51            | -0.73            | -0.29             | -0.21             |
| 25 | ASP N   | 1.29            | 0.73             | -2.65           | -1.88           | -0.44            | -1.08             | 0.19              | 108 | PHE CB  | 0.65            | -0.65            | 0.14            | -0.81           | -0.40            | -0.47             | -0.36             |
| 26 | ASP CA  | 0.99            | -0.28            | 0.32            | -0.42           | -0.97            | -0.54             | -0.30             | 109 | PHE CG  | 2.70            | -0.08            | 0.31            | 0.17            | -0.32            | 0.89              | -0.58             |
| 27 | ASP C   | -2.39           | 1.29             | 2.13            | 0.50            | 0.09             | 0.28              | -0.46             | 110 | PHE CD1 | 0.59            | -0.66            | -1.04           | -0.44           | -0.54            | -0.13             | -0.51             |
| 28 | ASP O   | -1.95           | -0.50            | 0.89            | 0.63            | -0.96            | -0.54             | -0.17             | 111 | PHE CD2 | 0.75            | -0.46            | -0.90           | -0.24           | -0.55            | -0.19             | -0.62             |
| 29 | ASP CB  | 0.04            | -0.32            | 0.19            | -0.63           | -0.55            | -0.78             | -0.40             | 112 | PHE CE1 | 0.53            | -0.38            | -0.84           | 0.11            | -0.56            | -0.01             | -0.63             |
| 30 | ASP CG  | -0.45           | -0.08            | 0.29            | -0.48           | -1.10            | -0.94             | -0.57             | 113 | PHE CE2 | 0.62            | -0.49            | -0.68           | 0.32            | -0.52            | -0.11             | -0.77             |
| 31 | ASP OD1 | -1.44           | 0.01             | 0.52            | 0.43            | -0.89            | -0.92             | 0.03              | 114 | PHE CZ  | 0.52            | -0.39            | -0.52           | 0.35            | -0.38            | 0.14              | -0.61             |
| 32 | ASP OD2 | -1.08           | -0.17            | 0.42            | 0.86            | -0.68            | -0.83             | -0.16             | 115 | PRO N   | 2.32            | 0.30             | -1.78           | -1.34           | 0.63             | -0.29             | -0.77             |
| 33 | CYS N   | 0.99            | -0.24            | -2.18           | -1.82           | 0.53             | -0.34             | 0.08              | 116 | PRO CA  | 0.84            | -1.07            | 0.17            | -0.81           | -0.40            | -0.56             | -0.50             |
| 34 | CYS CA  | 0.47            | -0.43            | 0.63            | -1.31           | -0.26            | -0.38             | -0.20             | 117 | PRO C   | -2.58           | 1.29             | 1.90            | 0.72            | 0.44             | 0.21              | -0.41             |
| 35 | CYS C   | -2.12           | 0.85             | 2.69            | 0.30            | 0.01             | -0.23             | -0.51             | 118 | PRO O   | -1.54           | -0.41            | 0.74            | 0.87            | -0.84            | -0.54             | -0.32             |
| 36 | CYS O   | -1.87           | -1.46            | -0.16           | 0.53            | -0.91            | -0.62             | -0.23             | 119 | PRO CB  | 0.51            | -0.29            | -0.56           | -0.04           | -0.24            | -0.43             | -0.53             |
| 37 | CYS CB  | 0.17            | -0.61            | -0.67           | -0.75           | -0.59            | -0.53             | -0.48             | 120 | PRO CG  | 1.02            | -0.35            | -0.43           | -0.06           | 0.00             | -0.18             | -0.43             |
| 38 | CYS SG  | -0.14           | -0.32            | -0.83           | 0.06            | -0.72            | -0.13             | -0.31             | 121 | PRO CD  | 1.11            | 0.01             | -1.37           | -1.00           | -0.06            | -0.20             | -0.16             |
| 39 | GLN N   | 1.16            | 1.42             | -2.61           | -1.98           | 0.17             | -0.76             | 0.58              | 122 | SER N   | 1.17            | 0.64             | -2.30           | -1.74           | -0.26            | -0.69             | 0.33              |
| 40 | GLN CA  | 1.36            | -0.79            | 1.24            | -0.58           | -0.88            | -0.53             | -0.25             | 123 | SER CA  | 0.76            | -0.84            | 0.21            | -0.75           | -0.91            | -0.57             | -0.42             |
| 41 | GLN C   | -2.12           | 1.18             | 2.70            | 1.53            | 0.84             | 0.38              | -0.24             | 124 | SER C   | -2.45           | 0.42             | 1.40            | 0.58            | -0.08            | 0.00              | -0.35             |
| 42 | GLN O   | -1.89           | -0.92            | 1.02            | 0.87            | -0.82            | -0.42             | -0.10             | 125 | SER O   | -1.82           | -0.84            | 0.68            | 0.54            | -0.86            | -0.37             | -0.10             |
| 43 | GLN CB  | -0.22           | -0.72            | 0.27            | -1.01           | -0.31            | -0.58             | -0.33             | 126 | SER CB  | 0.19            | -0.58            | -0.14           | -0.50           | -0.53            | -0.58             | -0.44             |
| 44 | GLN CG  | 0.65            | -0.53            | -0.21           | -0.79           | -0.39            | -0.85             | -0.50             | 127 | SER OG  | -1.01           | -0.55            | -0.16           | -0.30           | -0.73            | -0.84             | -0.20             |
| 45 | GLN CD  | -0.04           | -0.66            | -0.33           | 0.27            | -0.53            | -0.41             | -0.86             | 128 | THR N   | 1.74            | 0.97             | -2.21           | -1.90           | 0.16             | -0.54             | 0.52              |
| 46 | GLN OE1 | -0.91           | -0.56            | 0.02            | 0.34            | -0.58            | -0.44             | -0.28             | 129 | THR CA  | 0.99            | -1.65            | 0.57            | -0.99           | -0.90            | -0.71             | -0.28             |
| 47 | GLN NE2 | 0.03            | -0.53            | -0.33           | -0.44           | -0.43            | -0.65             | -0.38             | 130 | THR C   | -2.18           | 0.57             | 1.93            | 0.63            | 0.25             | 0.14              | -0.51             |
| 48 | GLU N   | 1.95            | 1.42             | -2.90           | -2.01           | -0.25            | -1.12             | 0.32              | 131 | THR O   | -1.90           | -1.02            | 0.65            | 0.47            | -0.87            | -0.43             | -0.19             |
| 49 | GLU CA  | 1.63            | -0.85            | 1.37            | -0.47           | -0.87            | -0.53             | -0.25             | 132 | THR CB  | 0.18            | -0.89            | 0.23            | -0.86           | -0.70            | -0.71             | -0.47             |
| 50 | GLU C   | -2.38           | 0.47             | 3.22            | 0.89            | 0.11             | 0.25              | -0.17             | 133 | THR OG1 | -0.55           | -0.69            | 0.12            | -0.46           | -0.70            | -0.88             | -0.48             |
| 51 | GLU O   | -1.83           | -0.47            | 1.63            | 0.91            | -0.85            | -0.58             | 0.08              | 134 | THR CG2 | 0.57            | -0.25            | -0.50           | -0.22           | -0.45            | -0.53             | -0.75             |
| 52 | GLU CB  | -0.28           | -0.61            | 0.60            | -0.86           | -0.56            | -0.90             | -0.36             | 135 | TRP N   | 2.27            | 0.44             | -2.43           | -1.78           | 0.50             | -0.34             | 0.64              |
| 53 | GLU CG  | 0.50            | -0.20            | -0.07           | -0.55           | -0.27            | -0.89             | -0.52             | 136 | TRP CA  | 1.32            | 0.11             | 1.36            | -1.13           | -0.75            | -0.54             | -0.24             |
| 54 | GLU CD  | 0.22            | -0.59            | 0.21            | 0.68            | -0.89            | -0.32             | -0.85             | 137 | TRP C   | -2.57           | 2.49             | 2.49            | 1.27            | 0.72             | 0.80              | -0.08             |
| 55 | GLU OE1 | -0.82           | -0.49            | 1.08            | 1.20            | -0.66            | -0.46             | -0.17             | 138 | TRP O   | -1.73           | -0.92            | 1.35            | 0.63            | -0.84            | -0.38             | 0.08              |
| 56 | GLU OE2 | -0.29           | -0.11            | 0.97            | 1.19            | -0.38            | -0.34             | -0.06             | 139 | TRP CB  | 0.49            | -0.62            | -0.38           | -0.76           | -0.18            | -0.20             | -0.23             |
| 57 | GLY N   | 0.95            | 0.35             | -2.00           | -1.54           | -0.02            | -0.66             | 0.22              | 140 | TRP CG  | 1.60            | -0.19            | -0.44           | 0.35            | 0.56             | 1.14              | -0.52             |
| 58 | GLY CA  | 0.32            | -0.34            | -0.01           | -0.62           | -0.39            | -0.53             | -0.50             | 141 | TRP CD1 | 0.12            | -0.63            | -1.02           | -0.73           | -0.57            | -0.19             | -0.40             |
| 59 | GLY C   | -1.78           | -0.03            | 1.23            | 0.32            | -0.42            | -0.29             | -0.83             | 142 | TRP CD2 | 1.28            | 0.32             | 0.29            | 1.02            | 0.38             | 1.12              | -0.63             |
| 60 | GLY O   | -1.69           | -0.93            | 0.82            | 0.64            | -0.84            | -0.57             | -0.35             | 143 | TRP NE1 | 0.09            | -0.65            | -0.81           | -0.59           | -0.60            | -0.89             | -0.40             |
| 61 | HIS N   | 1.71            | 0.71             | -2.36           | -1.91           | 0.49             | -0.55             | 0.45              | 144 | TRP CE2 | 0.90            | -0.03            | 0.07            | 1.64            | -0.32            | 0.56              | -0.83             |
| 62 | HIS CA  | 0.33            | -0.79            | 0.88            | -1.17           | -0.68            | -1.06             | -0.29             | 145 | TRP CE3 | 0.57            | -0.28            | -1.14           | 0.03            | -0.32            | 0.18              | -0.51             |
| 63 | HIS C   | -2.44           | 1.81             | 3.48            | 1.32            | -0.07            | 0.03              | -0.37             | 146 | TRP CZ2 | 0.53            | -0.79            | -1.07           | 0.08            | -0.15            | -0.02             | -0.55             |
| 64 | HIS O   | -1.98           | -1.05            | 0.53            | 0.64            | -0.91            | -0.51             | -0.23             | 147 | TRP CZ3 | 0.54            | -0.73            | -0.75           | 0.28            | -0.12            | 0.26              | -0.44             |
| 65 | HIS CB  | 0.53            | -0.59            | -0.09           | -0.84           | -0.62            | -0.67             | -0.35             | 148 | TRP CH2 | 0.93            | -0.41            | -0.63           | 0.52            | -0.33            | 0.25              | -0.46             |
| 66 | HIS CG  | 1.57            | -0.68            | -0.74           | -0.24           | -0.49            | 0.53              | -0.60             | 149 | TYR N   | 1.07            | 1.07             | -2.16           | -1.88           | 0.53             | -0.32             | 0.30              |
| 67 | HIS ND1 | -0.30           | -0.55            | -0.56           | -0.46           | -0.47            | -1.06             | -0.32             | 150 | TYR CA  | 0.61            | -0.44            | -0.25           | -1.25           | -0.62            | -0.80             | -0.08             |
| 68 | HIS CD2 | 0.19            | -0.38            | -1.03           | -0.48           | -0.40            | -0.55             | -0.51             | 151 | TYR C   | -2.31           | 0.92             | 1.93            | 0.41            | -0.48            | 0.05              | -0.54             |
| 69 | HIS CE1 | 0.62            | -0.23            | 0.03            | -0.17           | -0.63            | -0.48             | -0.58             | 152 | TYR O   | -1.90           | -1.40            | 0.84            | 0.42            | -0.88            | -0.47             | -0.15             |
| 70 | HIS NE2 | 0.72            | -0.40            | 0.03            | -0.16           | -0.48            | -0.73             | -0.36             | 153 | TYR CB  | 0.62            | -0.57            | -0.26           | -0.74           | -0.25            | -0.33             | -0.49             |
| 71 | ILE N   | 1.28            | 0.84             | -2.16           | -2.18           | 0.72             | 0.03              | 0.39              | 154 | TYR CG  | 1.69            | -0.20            | 0.20            | 0.59            | -0.27            | 0.59              | -0.52             |
| 72 | ILE CA  | 1.27            | -0.85            | 1.27            | -1.34           | -1.09            | -0.53             | -0.38             | 155 | TYR CD1 | 0.80            | -0.61            | -0.79           | -0.39           | -0.31            | -0.16             | -0.46             |
| 73 | ILE C   | -2.57           | 1.49             | 1.89            | 1.15            | -0.33            | 0.26              | -0.57             | 156 | TYR CD2 | 0.48            | -0.61            | -1.08           | -0.49           | -0.65            | -0.05             | -0.50             |
| 74 | ILE O   | -2.06           | -1.35            | 0.89            | 0.37            | -0.91            | -0.43             | -0.22             | 157 | TYR CE1 | 0.64            |                  |                 |                 |                  |                   |                   |

Table 3. (continued)

|        |     | 135<br>TRP<br>N | 136<br>TRP<br>CA | 137<br>TRP<br>C | 138<br>TRP<br>O | 139<br>TRP<br>CB | 140<br>TRP<br>CG | 141<br>TRP<br>CD1 | 142<br>TRP<br>CD2 | 143<br>TRP<br>NE1 | 144<br>TRP<br>CE2 | 145<br>TRP<br>CE3 | 146<br>TRP<br>CZ2 | 147<br>TRP<br>CZ3 | 148<br>TRP<br>CH2 |
|--------|-----|-----------------|------------------|-----------------|-----------------|------------------|------------------|-------------------|-------------------|-------------------|-------------------|-------------------|-------------------|-------------------|-------------------|
| 0 SAS  | SAS | 2.14            | 1.99             | 2.48            | 1.43            | 1.72             | 2.03             | 1.24              | 2.15              | 1.06              | 2.07              | 2.00              | 1.21              | 1.63              | 1.30              |
| 1 ALA  | N   | 2.12            | 0.88             | -2.38           | -1.99           | 0.59             | 0.38             | 0.36              | 0.36              | 0.68              | 0.35              | 0.21              | 0.37              | -0.12             | 0.06              |
| 2 ALA  | CA  | 1.11            | 0.05             | 1.14            | -0.64           | -0.73            | -0.92            | -0.67             | -0.84             | -0.35             | -0.75             | -0.78             | -0.57             | -0.81             | -0.74             |
| 3 ALA  | C   | -2.33           | 1.71             | 4.00            | 1.10            | 0.05             | 0.42             | -0.51             | 0.84              | -0.46             | 0.83              | -1.17             | -0.70             | -1.09             | -0.82             |
| 4 ALA  | O   | -1.88           | -0.62            | 0.62            | 0.63            | -0.80            | 0.61             | -0.30             | 0.99              | -0.45             | 1.41              | 0.03              | -0.03             | 0.01              | 0.39              |
| 5 ALA  | CB  | 0.52            | -0.80            | -0.12           | -0.67           | -0.60            | -0.85            | -0.46             | -1.03             | -0.41             | -1.11             | -0.91             | -0.69             | -0.84             | -0.81             |
| 6 ARG  | N   | 1.32            | 0.71             | -2.33           | -1.87           | 0.37             | 0.26             | 0.32              | 0.46              | 0.48              | 0.80              | -0.44             | 0.61              | -0.73             | 0.29              |
| 7 ARG  | CA  | 0.76            | -1.11            | -0.08           | -1.12           | -1.13            | -1.39            | -0.86             | -1.34             | -0.54             | -0.84             | -1.30             | -0.89             | -1.16             | -0.85             |
| 8 ARG  | C   | -2.62           | 2.02             | 4.00            | 0.44            | -0.04            | 0.69             | -1.35             | 0.24              | -0.05             | 0.20              | -1.85             | -0.29             | -1.51             | -0.85             |
| 9 ARG  | O   | -1.92           | -1.22            | 1.09            | 0.56            | -0.75            | -0.18            | -0.73             | 0.77              | -0.44             | 1.72              | -0.11             | 0.43              | -0.22             | 0.24              |
| 10 ARG | CB  | 0.44            | -1.11            | -0.39           | -0.98           | -0.59            | -1.31            | -0.48             | -1.53             | -0.38             | -1.39             | -1.22             | -0.67             | -1.22             | -1.04             |
| 11 ARG | CG  | 0.71            | -0.48            | -0.49           | -0.81           | -0.48            | -0.95            | -0.54             | -1.34             | -0.74             | -1.59             | -0.81             | -1.03             | -0.90             | -1.11             |
| 12 ARG | CD  | 1.21            | -0.36            | -0.17           | -0.42           | -0.36            | -1.41            | -0.67             | -1.82             | -0.67             | -1.85             | -1.07             | -1.21             | -0.87             | -1.00             |
| 13 ARG | NE  | 1.60            | 0.07             | 0.91            | -0.58           | -0.10            | -1.23            | -0.48             | -1.16             | -0.45             | -1.06             | -0.48             | -0.75             | -0.21             | -0.80             |
| 14 ARG | CZ  | 1.86            | -0.60            | 0.08            | 0.91            | -0.90            | -2.21            | -1.41             | -1.93             | -0.90             | -1.92             | -0.71             | -1.20             | -0.38             | -0.98             |
| 15 ARG | NH1 | 0.92            | -0.55            | -0.42           | -0.50           | -0.43            | -1.03            | -0.79             | -0.42             | -0.56             | -0.59             | 0.17              | -0.61             | 0.01              | -0.36             |
| 16 ARG | NH2 | 0.30            | -0.36            | -0.21           | -0.27           | -0.42            | -0.79            | -0.53             | -0.30             | -0.12             | -0.27             | -0.07             | -0.45             | 0.03              | -0.20             |
| 17 ASN | N   | 2.29            | 0.09             | -2.69           | -2.09           | 1.35             | 1.03             | 0.22              | 0.76              | 0.51              | 0.66              | 0.07              | 0.60              | -0.14             | 0.45              |
| 18 ASN | CA  | 1.23            | -0.54            | 0.46            | -0.80           | -0.23            | -0.45            | -0.90             | -0.33             | -0.61             | -0.52             | -0.75             | -0.88             | -0.72             | -0.71             |
| 19 ASN | C   | -2.52           | 0.69             | 3.09            | 0.59            | 0.12             | 0.08             | -1.10             | -0.24             | -0.11             | -0.38             | -0.70             | -0.73             | -0.31             | -0.85             |
| 20 ASN | O   | -1.95           | -0.88            | 1.48            | 0.47            | -0.89            | 0.14             | -0.93             | 0.70              | -0.64             | 1.20              | 0.28              | -0.02             | 0.32              | -0.04             |
| 21 ASN | CB  | 0.74            | -0.71            | -0.19           | -1.19           | -0.31            | -0.59            | -0.42             | -1.16             | -0.48             | -1.18             | -0.85             | -0.84             | -0.70             | -0.76             |
| 22 ASN | CG  | -0.17           | -0.06            | -0.69           | -0.32           | -0.28            | -1.04            | -0.80             | -0.95             | -0.83             | -1.33             | -0.63             | -1.20             | -0.70             | -0.83             |
| 23 ASN | OD1 | -0.72           | -0.69            | 0.63            | 0.17            | -0.29            | 0.00             | -0.31             | 0.19              | -0.97             | 0.08              | 0.06              | -0.35             | 0.21              | -0.04             |
| 24 ASN | ND2 | 0.32            | -0.38            | -0.35           | -0.64           | 0.02             | -0.20            | -0.50             | -0.55             | -0.46             | -0.78             | -0.09             | -0.43             | -0.19             | -0.22             |
| 25 ASP | N   | 2.14            | 1.21             | -2.73           | -1.58           | 0.46             | 0.89             | 0.16              | 0.97              | 0.42              | 0.68              | 0.73              | 0.40              | -0.01             | 0.34              |
| 26 ASP | CA  | 0.66            | -0.08            | 1.50            | -0.10           | -0.57            | -0.61            | -1.10             | -0.67             | -1.11             | -0.38             | -0.34             | -0.87             | -0.02             | -0.79             |
| 27 ASP | C   | -2.36           | 1.12             | 1.02            | 1.03            | 0.24             | -0.35            | -1.23             | 0.28              | -0.21             | -0.69             | -0.13             | -0.63             | -0.50             | -0.68             |
| 28 ASP | O   | -1.93           | -0.33            | 0.57            | 0.76            | -0.77            | 0.84             | -0.89             | 0.92              | -0.43             | 0.85              | 0.79              | 0.02              | 0.21              | 0.23              |
| 29 ASP | CB  | 1.02            | -0.31            | 0.49            | -0.34           | 0.09             | 0.32             | -0.70             | 0.07              | -0.71             | -0.48             | 0.05              | -0.52             | -0.20             | -0.38             |
| 30 ASP | CG  | -0.25           | 0.86             | 0.73            | 0.16            | 0.01             | 2.49             | -0.44             | 2.07              | -0.72             | 0.16              | 0.53              | -0.48             | 0.44              | -0.09             |
| 31 ASP | OD1 | -0.69           | 0.33             | 0.60            | 1.08            | 0.00             | 1.44             | 0.15              | 2.18              | -1.07             | 1.97              | 1.06              | -0.02             | 1.21              | 0.83              |
| 32 ASP | OD2 | -0.11           | 0.05             | 0.88            | 1.15            | 0.31             | 1.45             | -0.10             | 1.90              | -0.84             | 1.75              | 1.24              | 0.10              | 1.15              | 0.70              |
| 33 CYS | N   | 0.94            | 0.18             | -2.17           | -2.21           | 0.44             | 1.45             | 0.19              | 1.39              | 0.60              | 0.73              | -0.62             | -0.16             | -0.61             | 0.23              |
| 34 CYS | CA  | 1.69            | -0.89            | 1.23            | -1.14           | -0.50            | -0.58            | -0.41             | -1.24             | -0.50             | 0.07              | -1.03             | -0.38             | -1.18             | -0.64             |
| 35 CYS | C   | -1.59           | 1.09             | 4.00            | 1.74            | -0.78            | 0.26             | -0.57             | -0.16             | 0.04              | 1.37              | -1.91             | -0.67             | -1.14             | -0.90             |
| 36 CYS | O   | -2.13           | -1.62            | 0.50            | 0.47            | -1.29            | 1.41             | -0.13             | 1.22              | -0.56             | 1.28              | -0.60             | -0.21             | -0.47             | 0.14              |
| 37 CYS | CB  | 0.36            | 0.04             | -0.37           | -0.77           | -0.77            | -0.82            | -0.54             | -1.32             | -0.47             | -1.55             | -0.78             | -1.05             | -1.01             | -1.07             |
| 38 CYS | SG  | -0.04           | -0.76            | -0.50           | -0.32           | -0.55            | -0.51            | -0.72             | -0.26             | -0.64             | -0.25             | -0.58             | -0.45             | -0.36             | -0.24             |
| 39 GLN | N   | 2.06            | 0.75             | -2.57           | -1.99           | 1.14             | 1.00             | 0.14              | -0.43             | 1.20              | 0.23              | -0.44             | 1.12              | -0.41             | 0.39              |
| 40 GLN | CA  | 0.53            | -0.97            | 0.47            | -0.79           | -0.91            | -1.41            | -0.84             | -1.06             | -0.31             | -1.00             | -1.28             | -0.44             | -1.09             | -0.63             |
| 41 GLN | C   | -2.68           | 1.05             | 4.00            | 1.22            | -0.36            | -0.63            | -1.28             | -0.24             | 0.12              | 0.32              | -1.36             | -0.05             | -1.25             | -0.73             |
| 42 GLN | O   | -1.81           | -0.97            | 0.88            | 0.76            | -0.75            | 0.15             | -0.75             | 0.53              | -0.23             | 1.10              | 0.33              | 0.31              | 0.11              | 0.00              |
| 43 GLN | CB  | 0.58            | -0.94            | -0.09           | -1.09           | -0.28            | -1.06            | -0.82             | -1.27             | -0.82             | -1.40             | -0.88             | -0.54             | -0.85             | -0.56             |
| 44 GLN | CG  | 0.89            | -0.78            | -0.60           | -0.69           | -0.38            | -0.72            | -0.30             | -1.23             | -0.45             | -1.06             | -0.80             | -0.73             | -0.81             | -0.82             |
| 45 GLN | CD  | 1.19            | -1.08            | -0.11           | 0.22            | -0.62            | -1.05            | -0.52             | -0.61             | -0.83             | -0.85             | -0.89             | -1.39             | -0.42             | -0.97             |
| 46 GLN | OE1 | 0.25            | -0.52            | 1.09            | 0.66            | 0.06             | -0.06            | -0.29             | 0.13              | -1.03             | 0.30              | 0.45              | -0.65             | 0.16              | 0.00              |
| 47 GLN | NE2 | 0.49            | -0.83            | -0.15           | -0.50           | 0.23             | 0.26             | -0.24             | -0.30             | -0.22             | -0.54             | -0.18             | -0.43             | -0.14             | -0.36             |
| 48 GLU | N   | 1.34            | 0.67             | -2.72           | -1.93           | 1.79             | 1.09             | 0.26              | 0.91              | 0.72              | 0.26              | 0.43              | 0.49              | 0.14              | 0.43              |
| 49 GLU | CA  | 1.05            | -0.31            | 0.98            | -0.53           | -0.40            | -0.57            | -0.73             | -0.99             | -0.41             | -0.71             | -0.43             | -0.45             | -0.70             | -0.56             |
| 50 GLU | C   | -2.59           | 1.46             | 0.74            | 0.55            | 0.55             | 1.05             | -0.81             | -0.53             | -0.13             | 0.57              | -1.13             | -0.50             | -0.37             | -0.36             |
| 51 GLU | O   | -1.79           | -0.37            | 0.86            | 1.00            | -0.75            | -0.18            | -0.46             | 0.63              | -0.22             | 1.61              | 0.29              | 0.30              | 0.29              | 0.34              |
| 52 GLU | CB  | 0.90            | -0.98            | 1.26            | -0.92           | 0.05             | 0.10             | -0.40             | -0.25             | -0.48             | -0.76             | 0.00              | -0.59             | -0.39             | -0.43             |
| 53 GLU | CG  | 0.93            | 0.29             | 0.62            | -0.33           | 0.17             | 0.05             | -0.83             | -0.06             | -0.85             | -0.79             | -0.19             | -0.76             | -0.33             | -0.66             |
| 54 GLU | CD  | 1.49            | 0.21             | 0.31            | 0.72            | -0.13            | 0.07             | -0.42             | 1.15              | -0.65             | 0.35              | -0.22             | -1.31             | -0.41             | -0.88             |
| 55 GLU | OE1 | 0.54            | -0.52            | 1.50            | 1.57            | 0.57             | 1.61             | -0.06             | 1.59              | -0.80             | 1.51              | 1.20              | 0.00              | 0.60              | 0.20              |
| 56 GLU | OE2 | 0.49            | 0.68             | 1.61            | 0.93            | 0.34             | 1.89             | 0.10              | 2.35              | -1.02             | 1.77              | 0.76              | -0.34             | 0.72              | 0.55              |
| 57 GLY | N   | 0.97            | 0.47             | -2.33           | -1.81           | 0.66             | -0.78            | -0.23             | -1.24             | -0.22             | -0.93             | -0.24             | -0.13             | -0.28             | 0.01              |
| 58 GLY | CA  | 0.58            | -0.22            | 0.00            | -0.78           | -0.22            | -0.54            | -0.60             | -0.94             | -0.70             | -1.25             | -0.71             | -0.94             | -0.80             | -0.81             |
| 59 GLY | C   | -1.45           | 0.13             | 2.39            | 0.92            | -0.69            | -1.18            | -1.41             | -0.60             | -0.89             | -0.60             | -1.21             | -1.04             | -0.85             | -0.88             |
| 60 GLY | O   | -1.68           | -1.03            | 0.50            | 0.69            | -0.63            | 0.17             | -0.89             | 0.92              | -0.81             | 0.84              | -0.09             | -0.26             | -0.17             | -0.02             |
| 61 HIS | N   | 2.58            | 1.62             | -2.87           | -2.14           | 0.62             | 1.62             | 0.08              | 1.05              | -0.13             | 0.65              | 0.03              | 0.24              | 0.12              | -0.04             |
| 62 HIS | CA  | 0.97            | -0.05            | 2.61            | -0.61           | -0.81            | -0.58            | -0.70             | -0.54             | -0.91             | -0.82             | -0.70             | -1.47             | -0.97             | -1.36             |
| 63 HIS | C   | -2.59           | 3.06             | 3.05            | 0.03            | 0.14             | 0.43             | -1.39             | -0.72             | -0.60             | 0.66              | -1.29             | -0.27             | -0.78             | -1.41             |
| 64 HIS | O   | -2.06           | -1.25            | 2.09            | 0.62            | -1.04            | -0.86            | -0.71             | -0.39             | -1.03             | 0.75              | 0.16              | -0.27             | 0.35              | 0.01              |
| 65 HIS | CB  | 0.52            | -0.72            | 0.32            | -0.97           | -0.44            | -1.15            | -1.14             | -1.29             | -0.92             | -1.45             | -0.58             | -1.03             | -1.13             | -1.15             |
| 66 HIS | CG  | 1.09            | -0.82            | 3.34            | 1.06            | -0.67            | -1.31            | -1.18             | -1.61             | -1.05             | -2.20             | -1.12             | -1.81             | -1.20             | -1.57             |
| 67 HIS | ND1 | -0.29           | -0.66            | 1.00            | -0.72           | -0.28            | -0.79            | -0.11             | -1.04             | -1.34             | -1.09             | -0.25             | -0.82             | 0.27              | -0.39             |
| 68 HIS | CD2 | 0.88            | -0.50            | 0.19            | -0.67           | -0.31            | -1.41            | -0.92             | -1.57             | -0.73             | -1.42             | -0.78             | -1.27             | -0.64             | -1.00             |
| 69 HIS | CE1 | 1.06            | -0.65            | 0.67            | -0.05           | -0.55            | -1.08            | -0.68             | -0.78             | -0.53             | -0.64             | -0.55             | -0.73             | -0.51             | -0.94             |
| 70 HIS | NE2 | 0.75            | -0.38            | -0.05           | -0.04           | -0.42            | -0.52            | -0.25             | -0.33             | -0.59             | -0.45             | -0.20             | -0.57             | -0.04             | -0.56             |
| 71 ILE | N   | 1.61            | 0.76             | -2.22           | -2.17           | 0.94             | 1.54             | 0.31              | 1.40              | 0.52              | 0.94              | -0.02             | 0.58              | -0.13             | 0.22              |
| 72 ILE | CA  | 1.27            | -0.66            | 1.32            | -1.20           | -0.81            | 0.70             | -0.46             | 0.58              | -0.17             | -0.12             | -0.62             | -0.64             | -0.78             | -0.98             |
| 73 ILE | C   | -2.49           | 3.80             | 4.00            | 0.85            | 0.36             | 2.18             | -0.79             | 1.56              | 0.27              | 0.39              | -1.84             | -0.67             | -1.39             | -1.10             |
| 74 ILE | O   | -2.11           | -1.53            | 1.14            | 0.43            | -0.82            | 0.31             | -0.45             | 1.32              | -0.30             | 1.76              | 0.06              | 0.19              | -0.28             | 0.11              |
| 75 ILE | CB  | 1.12            | -1.50            | 0.99            | -0.99           | -1.05            | -1.30            | -0.80             | -0.83             | -0.56             | -0.70             | -1.01             | -0.66             | -0.76             | -0.88             |
| 76 ILE | CG1 | 1.06            | -0.85            | -0.96           | -0.66           | -0.91            | -0.98            | -0.63             | -1.01             | -0.03             | -0.79             | -1.10             | -0.80             | -1.18             | -1.13             |
| 77 ILE | CG2 | 0.31            | -0.07            | -0.73           | -0.09           | -0.84            | -1.18            | -0.72             | -1.22             | -0.54             | -1.18             | -1.19             | -0.89             | -1.20             | -1.10             |
| 78 ILE | CD1 | 0.57            | -0.59            | -0.73           | 0.12            | -1.04            | -1.24            | -0.48             | -1.19             | -0.37             | -1.14             | -1.26             | -0.99             | -1.26             | -1.24             |
| 79 LEU | N   | 1.60            | 0.49             | -2.30           | -2.10           | 0.94             | 1.62             | 0.06              | 1.86              | 0.25              | 0.89              | 0.15              | 0.35              | -0.12             | -0.07             |
| 80 LEU | CA  | 0.71            | -0.67            | 1.02            | -1.14           | -1.42            | -0.45            | -0.97             | 0.02              | -0.53             | -0.06             | -1.01             | -0.47             | -1.10             | -0.74             |
| 81 LEU | C   | -2.44           | 2.36             | 2.93            | 0.72            | -0.61            | 0.23             | -0.67             | 1.07              | -0.53             | 0.17              | -1.40             | -0.96             | -1.18             | -0.85             |
| 82 LEU | O   | -2.19           | -0.97            | 0.95            | 0.46            | -1.15            | -0.01            | -0.53             | 0.65              | -0.57             |                   |                   |                   |                   |                   |

Table 3. (continued)

|         |     | 135<br>TRP<br>N | 136<br>TRP<br>CA | 137<br>TRP<br>C | 138<br>TRP<br>O | 139<br>TRP<br>CB | 140<br>TRP<br>CG | 141<br>TRP<br>CD1 | 142<br>TRP<br>CD2 | 143<br>TRP<br>NE1 | 144<br>TRP<br>CE2 | 145<br>TRP<br>CE3 | 146<br>TRP<br>CZ2 | 147<br>TRP<br>CZ3 | 148<br>TRP<br>CH2 |
|---------|-----|-----------------|------------------|-----------------|-----------------|------------------|------------------|-------------------|-------------------|-------------------|-------------------|-------------------|-------------------|-------------------|-------------------|
| 83 LEU  | CB  | 0.80            | -0.95            | -0.35           | -1.07           | -0.91            | -0.97            | -0.61             | -1.05             | -0.58             | -1.33             | -1.15             | -0.77             | -1.12             | -1.01             |
| 84 LEU  | CG  | 0.82            | -0.52            | -0.69           | -1.08           | -0.94            | -0.93            | -0.59             | -0.64             | -0.32             | -1.00             | -0.89             | -0.51             | -1.06             | -0.94             |
| 85 LEU  | CD1 | 0.46            | -0.79            | -0.87           | 0.03            | -1.02            | -1.33            | -0.60             | -1.32             | -0.26             | -1.07             | -1.28             | -0.73             | -1.16             | -1.11             |
| 86 LEU  | CD2 | 0.76            | -0.51            | -0.41           | -0.12           | -1.01            | -1.24            | -0.62             | -1.23             | -0.40             | -0.96             | -1.24             | -0.80             | -1.25             | -0.98             |
| 87 LYS  | N   | 2.05            | 0.86             | -2.64           | -2.13           | 0.69             | 0.97             | 0.26              | 0.96              | 0.31              | 0.77              | 0.05              | 1.05              | -0.14             | 0.33              |
| 88 LYS  | CA  | 0.71            | -1.01            | 1.10            | -1.22           | -0.82            | -1.02            | -0.69             | -1.07             | -0.46             | -0.86             | -1.01             | -0.47             | -0.88             | -0.92             |
| 89 LYS  | C   | -2.45           | 1.68             | 3.04            | 0.11            | 0.23             | -0.21            | -1.26             | -0.74             | -0.70             | 0.15              | -1.46             | -0.67             | -0.94             | -0.90             |
| 90 LYS  | O   | -1.88           | -1.14            | 0.06            | 0.47            | -0.71            | -0.17            | -0.61             | 0.25              | -0.14             | 1.29              | -0.16             | 0.33              | 0.37              | 0.36              |
| 91 LYS  | CB  | 0.70            | -0.98            | 0.56            | -1.01           | -0.24            | -0.53            | -0.44             | -1.16             | -0.24             | -1.25             | -0.58             | -0.66             | -0.62             | -0.70             |
| 92 LYS  | CG  | 0.83            | -0.41            | -0.42           | -0.80           | -0.25            | -1.18            | -0.35             | -1.46             | -0.33             | -1.41             | -0.89             | -0.82             | -0.72             | -0.71             |
| 93 LYS  | CD  | 1.05            | -0.38            | 0.09            | 0.25            | -0.09            | -0.70            | -0.15             | -0.84             | -0.50             | -1.25             | -0.18             | -1.04             | -0.11             | -0.32             |
| 94 LYS  | CE  | 1.59            | 0.12             | -0.36           | -0.08           | 0.01             | -0.81            | -0.28             | -0.80             | -0.40             | -1.02             | 0.06              | -0.69             | 0.06              | -0.22             |
| 95 LYS  | NZ  | 1.55            | 0.69             | 1.01            | 0.08            | 1.05             | 0.85             | 0.43              | 0.65              | 0.15              | 0.35              | 1.00              | 0.30              | 0.59              | 0.44              |
| 96 MET  | N   | 1.13            | 0.94             | -2.35           | -2.03           | 0.74             | 1.78             | 0.52              | 3.17              | 0.70              | 1.88              | -0.14             | 0.46              | -0.06             | 0.21              |
| 97 MET  | CA  | 0.12            | -0.91            | -0.01           | -1.38           | -1.20            | -1.42            | -0.81             | -0.94             | -0.74             | -1.08             | -0.74             | -0.61             | -1.27             | -1.01             |
| 98 MET  | C   | -2.05           | 3.53             | 4.00            | 0.47            | 0.12             | 1.71             | -1.21             | 0.58              | -0.65             | 1.19              | -1.63             | -0.62             | -0.72             | -1.04             |
| 99 MET  | O   | -2.17           | -1.25            | 0.17            | 0.12            | -1.19            | 0.04             | -0.44             | 0.50              | -0.88             | 1.39              | -0.20             | -0.21             | -0.05             | -0.37             |
| 100 MET | CB  | 0.70            | -0.80            | -1.23           | -1.10           | -0.52            | -0.68            | -0.69             | -1.24             | -0.66             | -1.29             | -1.05             | -0.92             | -1.08             | -0.93             |
| 101 MET | CG  | 1.15            | -0.80            | -0.55           | -1.04           | -0.52            | -0.94            | -0.76             | -1.11             | -0.49             | -1.45             | -1.07             | -1.09             | -1.28             | -1.17             |
| 102 MET | SD  | 0.43            | -1.29            | -1.04           | 0.23            | -1.09            | -0.77            | -0.76             | -0.26             | -0.69             | -0.25             | -0.84             | -0.98             | -0.95             | -0.90             |
| 103 MET | CE  | 0.09            | -1.11            | -1.53           | -0.75           | -0.94            | -1.43            | -0.78             | -1.59             | -0.91             | -1.66             | -1.16             | -1.08             | -1.15             | -1.16             |
| 104 PHE | N   | 1.81            | 0.61             | -2.10           | -2.15           | 0.52             | 1.42             | 0.13              | 1.59              | 0.68              | 0.63              | -0.30             | 0.24              | 0.12              | 0.34              |
| 105 PHE | CA  | 1.23            | -0.98            | 1.51            | -1.16           | -0.91            | -1.05            | -0.90             | -0.66             | -0.88             | -1.04             | -1.15             | -0.98             | -0.96             | -0.82             |
| 106 PHE | C   | -2.37           | 1.92             | 1.78            | 1.17            | -0.06            | -0.82            | -1.02             | 1.52              | -0.42             | 0.47              | -2.07             | -0.64             | -1.27             | -1.05             |
| 107 PHE | O   | -2.29           | -1.55            | 1.05            | 0.15            | -1.19            | 0.63             | -0.57             | 1.15              | -0.78             | 2.01              | -0.40             | 0.02              | -0.27             | 0.25              |
| 108 PHE | CB  | 0.35            | -0.73            | -0.40           | -0.90           | -0.98            | -0.91            | -0.66             | -1.02             | -0.59             | -1.26             | -1.17             | -0.89             | -1.20             | -1.10             |
| 109 PHE | CG  | 0.52            | -0.23            | 0.72            | -0.05           | -1.23            | -1.33            | -1.08             | -0.97             | -0.04             | -0.16             | -1.50             | -1.20             | -1.36             | -1.27             |
| 110 PHE | CD1 | 0.03            | -0.85            | -1.20           | -0.89           | -1.02            | -1.38            | -0.77             | -1.45             | -0.56             | -1.12             | -1.25             | -0.87             | -1.05             | -0.91             |
| 111 PHE | CD2 | 0.28            | -0.98            | -1.02           | -0.45           | -1.17            | -1.49            | -0.62             | -1.36             | -0.32             | -0.98             | -1.26             | -0.73             | -1.18             | -0.96             |
| 112 PHE | CE1 | -0.07           | -1.01            | -1.06           | 0.18            | -1.27            | -1.53            | -0.95             | -1.15             | -0.18             | -0.82             | -1.30             | -0.83             | -1.12             | -0.85             |
| 113 PHE | CE2 | -0.04           | -1.09            | -0.76           | -0.04           | -1.40            | -1.46            | -0.78             | -1.25             | -0.04             | -0.65             | -1.32             | -0.67             | -1.18             | -1.07             |
| 114 PHE | CZ  | 0.02            | -1.09            | -0.45           | 0.37            | -1.37            | -1.50            | -0.86             | -1.15             | -0.28             | -0.98             | -1.30             | -0.83             | -1.07             | -1.14             |
| 115 PRO | N   | 2.23            | 0.09             | -2.07           | -1.01           | -0.10            | -0.63            | -1.26             | -1.15             | -0.86             | -1.41             | -1.47             | -0.96             | -1.17             | -0.67             |
| 116 PRO | CA  | 1.77            | -0.78            | 1.63            | -0.15           | -0.61            | -1.25            | -0.93             | -1.43             | -0.66             | -1.53             | -0.70             | -1.09             | -0.70             | -0.66             |
| 117 PRO | C   | -2.58           | 2.22             | 0.45            | 1.78            | 0.23             | -0.47            | -0.71             | -0.05             | -0.54             | 0.46              | -0.61             | -0.60             | -0.71             | -0.60             |
| 118 PRO | O   | -1.58           | -0.37            | 0.82            | 0.91            | -0.81            | 0.46             | -0.78             | 1.11              | -1.15             | 0.90              | 0.21              | -0.48             | 0.23              | 0.04              |
| 119 PRO | CB  | 0.13            | -0.65            | 0.05            | 0.16            | -0.60            | -1.29            | -0.73             | -1.46             | -0.53             | -1.48             | -1.01             | -0.70             | -0.95             | -0.87             |
| 120 PRO | CG  | 0.20            | -0.64            | -0.25           | -0.17           | -0.81            | -1.46            | -0.96             | -1.52             | -0.74             | -1.27             | -0.94             | -1.08             | -0.96             | -1.01             |
| 121 PRO | CD  | 0.89            | -0.35            | -1.59           | -1.01           | -0.46            | -1.39            | -0.94             | -1.73             | -0.97             | -1.78             | -0.93             | -1.19             | -1.08             | -0.97             |
| 122 SER | N   | 1.33            | 0.80             | -2.47           | -1.96           | 0.40             | 0.51             | 0.27              | 0.44              | 0.31              | 0.14              | 0.30              | 0.04              | -0.16             | -0.11             |
| 123 SER | CA  | 0.29            | -0.19            | 1.83            | -0.91           | -0.55            | -0.83            | -0.76             | -0.98             | -0.42             | -0.70             | -0.89             | -0.90             | -0.96             | -0.68             |
| 124 SER | C   | -2.53           | 0.14             | 3.28            | 0.04            | 0.15             | -0.24            | -0.93             | -0.05             | -0.43             | -0.73             | -1.00             | -0.87             | -1.12             | -1.12             |
| 125 SER | O   | -1.89           | -1.11            | 0.48            | 0.31            | -0.65            | 0.75             | -0.44             | 0.59              | -0.44             | 0.67              | 0.09              | -0.02             | 0.21              | 0.14              |
| 126 SER | CB  | 0.63            | -0.21            | 0.30            | -0.55           | -0.24            | -0.37            | -0.49             | -0.76             | -0.50             | -0.96             | -0.39             | -0.63             | -0.64             | -0.72             |
| 127 SER | OG  | -0.33           | -0.36            | 0.58            | -0.20           | -0.06            | 0.62             | -0.29             | 0.88              | -0.87             | 0.45              | 0.45              | -0.13             | 0.42              | 0.09              |
| 128 THR | N   | 2.27            | 1.30             | -2.60           | -1.74           | 0.46             | 1.55             | 0.09              | 1.24              | 0.06              | 0.85              | 0.53              | 0.49              | 0.50              | 0.90              |
| 129 THR | CA  | 0.46            | 0.11             | 2.49            | -0.87           | -0.63            | -0.21            | -0.65             | 0.30              | -0.66             | -0.03             | -0.29             | -0.81             | -0.74             | -0.42             |
| 130 THR | C   | -2.40           | 1.37             | 2.49            | 1.31            | -0.38            | -0.47            | -1.03             | 0.28              | -0.81             | 0.04              | -1.15             | -1.09             | -0.75             | -0.63             |
| 131 THR | O   | -1.77           | -1.18            | 1.25            | 0.62            | -0.76            | 0.33             | -0.70             | 1.01              | -0.58             | 1.63              | 0.05              | 0.10              | 0.31              | 0.58              |
| 132 THR | CB  | -0.54           | -0.73            | 0.71            | -0.82           | -0.17            | 0.55             | -0.58             | 0.39              | -0.60             | -0.31             | -0.33             | -0.16             | -0.13             | -0.34             |
| 133 THR | OG1 | -0.35           | -0.52            | 0.79            | -0.42           | -0.21            | 1.17             | -0.18             | 1.11              | -0.92             | 0.50              | 0.19              | 0.00              | 0.27              | 0.29              |
| 134 THR | CG2 | 0.69            | -0.22            | -0.06           | 0.06            | -0.22            | -0.51            | -0.40             | -0.62             | -0.39             | -0.82             | -0.50             | -0.55             | -0.43             | -0.46             |
| 135 TRP | N   | 0.82            | 0.73             | -2.14           | -1.96           | 0.51             | 1.03             | 0.33              | 0.50              | 0.68              | 0.16              | 0.06              | 0.45              | 0.12              | -0.06             |
| 136 TRP | CA  | 0.72            | -1.38            | 1.60            | -1.02           | -1.43            | -0.96            | -1.00             | -1.18             | -0.16             | -0.86             | -0.92             | -0.78             | -0.63             | -0.91             |
| 137 TRP | C   | -2.10           | 1.63             | 4.00            | -0.06           | -0.54            | 1.25             | -0.28             | 0.01              | -0.31             | 0.88              | -1.03             | 0.11              | -0.27             | -0.69             |
| 138 TRP | O   | -1.96           | -1.08            | -0.06           | 0.92            | -1.18            | 0.10             | -0.40             | 0.63              | -0.68             | 1.74              | -0.16             | -0.55             | 0.28              | 0.29              |
| 139 TRP | CB  | 0.53            | -1.42            | -0.53           | -1.15           | -1.09            | -0.77            | -0.32             | -1.03             | -0.20             | -1.02             | -1.05             | -0.97             | -0.87             | -0.85             |
| 140 TRP | CG  | 1.06            | -0.97            | 1.24            | 0.14            | -0.78            | 2.22             | -0.25             | 0.17              | 0.02              | -0.21             | -1.15             | -1.03             | -0.94             | -0.94             |
| 141 TRP | CD1 | 0.38            | -1.00            | -0.28           | -0.45           | -0.32            | -0.25            | -0.06             | -0.41             | 0.09              | -0.03             | -0.79             | -0.40             | -0.83             | -0.57             |
| 142 TRP | CD2 | 0.55            | -1.18            | 0.00            | 0.66            | -1.02            | 0.17             | -0.41             | 0.53              | -0.54             | 0.43              | -1.25             | -0.27             | -0.70             | -0.64             |
| 143 TRP | NE1 | 0.71            | -0.17            | -0.32           | -0.73           | -0.20            | 0.02             | 0.10              | -0.56             | 0.58              | -0.22             | -0.54             | -0.11             | -0.42             | -0.26             |
| 144 TRP | CE2 | 0.22            | -0.85            | 0.88            | 1.74            | -1.03            | -0.20            | -0.02             | 0.43              | -0.19             | 2.14              | -0.85             | 0.19              | -0.89             | 0.02              |
| 145 TRP | CE3 | 0.11            | -0.92            | -1.02           | -0.19           | -1.05            | -1.16            | -0.79             | -1.26             | -0.52             | -0.85             | -1.35             | -0.69             | -0.91             | -0.82             |
| 146 TRP | CZ2 | 0.48            | -0.75            | 0.12            | -0.59           | -0.96            | -1.03            | -0.40             | -0.27             | -0.11             | 0.18              | -0.69             | -0.03             | -0.74             | -0.58             |
| 147 TRP | CZ3 | 0.17            | -0.62            | -0.26           | 0.24            | -0.87            | -0.94            | -0.83             | -0.71             | -0.41             | -0.90             | -0.91             | -0.74             | -1.14             | -0.80             |
| 148 TRP | CH2 | -0.03           | -0.90            | -0.67           | 0.24            | -0.85            | -0.94            | -0.57             | -0.64             | -0.27             | 0.02              | -0.82             | -0.58             | -0.79             | -0.88             |
| 149 TYR | N   | 1.37            | 0.75             | -2.22           | -2.18           | 0.33             | 0.01             | -0.08             | 0.43              | -0.01             | 0.22              | -0.56             | 0.48              | -0.28             | 0.18              |
| 150 TYR | CA  | -0.10           | -1.45            | 0.27            | -1.25           | -1.19            | -0.96            | -1.02             | -0.83             | -0.60             | -0.60             | -0.89             | -0.79             | -1.11             | -0.79             |
| 151 TYR | C   | -2.41           | 3.41             | 1.56            | 0.91            | -0.41            | -0.15            | -1.06             | -0.71             | -0.75             | 0.06              | -2.04             | -0.84             | -1.58             | -1.25             |
| 152 TYR | O   | -2.21           | -1.29            | 0.33            | 0.12            | -1.09            | 0.24             | -0.84             | 0.75              | -0.99             | 1.12              | -0.50             | -0.26             | -0.28             | 0.05              |
| 153 TYR | CB  | 0.51            | -1.23            | -0.35           | -1.12           | -0.86            | -0.95            | -0.97             | -1.27             | -0.71             | -1.47             | -1.51             | -1.00             | -1.27             | -1.16             |
| 154 TYR | CG  | 0.84            | -0.09            | 0.45            | 0.53            | -0.93            | -0.80            | -1.09             | -0.52             | -0.79             | 0.05              | -1.71             | -1.21             | -1.17             | -1.06             |
| 155 TYR | CD1 | 0.24            | -1.06            | -1.50           | -0.65           | -1.13            | -1.34            | -1.01             | -1.23             | -0.69             | -1.26             | -1.05             | -0.78             | -0.78             | -0.79             |
| 156 TYR | CD2 | 0.33            | -0.86            | -1.27           | -0.60           | -0.99            | -0.96            | -0.87             | -1.18             | -0.42             | -0.79             | -1.15             | -0.85             | -1.05             | -1.16             |
| 157 TYR | CE1 | 0.29            | -0.51            | -0.84           | -0.10           | -1.09            | -0.98            | -0.71             | -0.49             | -0.57             | -0.29             | -0.55             | -0.46             | -0.72             | -0.71             |
| 158 TYR | CE2 | 0.49            | -0.49            | -0.75           | -0.11           | -0.92            | -0.90            | -0.90             | 0.10              | -0.51             | 0.09              | -0.56             | -0.78             | -0.76             | -0.66             |
| 159 TYR | CZ  | 0.04            | -0.45            | 1.25            | 1.85            | -0.99            | -0.32            | -1.13             | 1.20              | -0.88             | 0.84              | -0.83             | -0.75             | -0.43             | -0.88             |
| 160 TYR | OH  | -0.33           | -0.34            | -0.34           | 0.11            | -0.51            | -0.24            | -0.34             | 0.39              | -0.89             | 0.58              | 0.00              | -0.41             | 0.13              | -0.22             |
| 161 VAL | N   | 2.20            | 0.59             | -2.24           | -2.23           | 0.77             | 2.03             | 0.56              | 1.16              | 0.54              | 1.27              | -0.23             | 0.99              | 0.27              | 0.45              |
| 162 VAL | CA  | 0.96            | -0.59            | 2.10            | -1.29           | -1.01            | -0.69            | -0.67             | -0.40             | -0.38             | 0.22              | -0.86             | -0.21             | -0.77             | -0.30             |
| 163 VAL | C   | -2.41           | 1.46             | 0.57            | 1.76            | 0.79             | 0.20             | -1.11             | 0.22              | 0.04              | -0.54             | -2.08             | -0.63             | -1.15             | -0.91             |
| 164 VAL | O   | -2.12           | -1.47            | -0.06           | 0.24            | -0.96            | 0.39             | -0.48             | 1.04              | -0.38             | 1.41              | -0.36             | 0.27              | 0.05              | 0.30              |
| 165 VAL | CB  | 1.09            | -1.08            | -0.39           | -1.27           | -1.06            | -1.00            | -0.56             | -                 |                   |                   |                   |                   |                   |                   |

Table 3. (continued)

|    |         | 149<br>TYR<br>N | 150<br>TYR<br>CA | 151<br>TYR<br>C | 152<br>TYR<br>O | 153<br>TYR<br>CB | 154<br>TYR<br>CG | 155<br>TYR<br>CD1 | 156<br>TYR<br>CD2 | 157<br>TYR<br>CE1 | 158<br>TYR<br>CE2 | 159<br>TYR<br>CZ | 160<br>TYR<br>OH |
|----|---------|-----------------|------------------|-----------------|-----------------|------------------|------------------|-------------------|-------------------|-------------------|-------------------|------------------|------------------|
| 0  | SAS SAS | 2.25            | 1.90             | 2.28            | 1.41            | 1.78             | 1.92             | 1.47              | 1.53              | 1.22              | 1.22              | 1.83             | 0.68             |
| 1  | ALA N   | 1.67            | 0.52             | -2.18           | -1.84           | 0.67             | 0.45             | 0.21              | 0.22              | 0.19              | 0.17              | 0.32             | 0.21             |
| 2  | ALA CA  | 0.72            | -0.34            | 0.85            | -0.75           | -0.86            | -0.88            | -0.71             | -1.00             | -0.62             | -0.74             | -1.09            | -0.45            |
| 3  | ALA C   | -2.23           | 0.76             | 2.14            | 0.68            | 0.15             | -0.20            | -0.99             | -0.77             | -0.71             | -0.51             | -0.31            | 0.12             |
| 4  | ALA O   | -1.93           | -0.90            | 0.55            | 0.53            | -0.92            | 0.40             | -0.31             | -0.39             | 0.08              | 0.17              | 1.01             | 0.36             |
| 5  | ALA CB  | 0.71            | -0.64            | -0.44           | -0.57           | -0.66            | -0.81            | -0.60             | -0.58             | -0.70             | -0.63             | -0.91            | -0.34            |
| 6  | ARG N   | 1.51            | 0.90             | -2.44           | -1.98           | 0.51             | 1.42             | 0.37              | 0.40              | 0.15              | 0.06              | -0.01            | -0.15            |
| 7  | ARG CA  | 1.37            | -0.72            | 0.07            | -1.12           | -0.78            | -1.01            | -0.90             | -1.08             | -0.80             | -0.83             | -1.12            | -0.67            |
| 8  | ARG C   | -2.41           | 0.80             | 1.14            | 0.55            | -0.14            | 0.34             | -1.26             | -1.07             | -1.06             | -0.65             | 0.07             | 0.04             |
| 9  | ARG O   | -1.96           | -1.16            | 0.19            | 0.46            | -0.90            | -0.28            | -0.69             | -0.48             | -0.03             | -0.24             | 0.88             | 0.04             |
| 10 | ARG CB  | 0.85            | -0.71            | 0.31            | -0.90           | -0.50            | -0.84            | -0.71             | -0.66             | -1.08             | -1.00             | -1.41            | -0.73            |
| 11 | ARG CG  | 1.09            | -0.33            | -0.30           | -0.75           | -0.59            | -1.17            | -0.72             | -0.67             | -0.90             | -0.94             | -1.45            | -0.83            |
| 12 | ARG CD  | 1.14            | -0.27            | -0.30           | -0.23           | -0.22            | -1.26            | -0.65             | -0.58             | -1.06             | -0.88             | -1.65            | -1.11            |
| 13 | ARG NE  | 1.65            | -0.17            | 0.53            | -0.24           | -0.22            | -0.91            | -0.43             | -0.45             | -0.47             | -0.44             | -0.87            | -0.77            |
| 14 | ARG CZ  | 0.64            | -0.57            | 0.78            | 0.94            | -0.67            | -1.60            | -1.09             | -1.06             | -0.92             | -1.07             | -1.20            | -0.38            |
| 15 | ARG NH1 | 0.87            | -0.04            | 0.08            | -0.25           | -0.09            | -0.44            | -0.25             | -0.28             | -0.35             | -0.57             | -0.45            | -0.75            |
| 16 | ARG NH2 | 0.96            | -0.24            | 0.31            | -0.11           | 0.03             | -0.19            | -0.20             | -0.16             | -0.20             | -0.26             | -0.30            | -0.42            |
| 17 | ASN N   | 1.62            | 0.70             | -2.54           | -1.83           | 0.68             | 0.47             | 0.33              | 0.13              | 0.24              | 0.03              | 0.23             | -0.03            |
| 18 | ASN CA  | 1.06            | -0.18            | 1.01            | -0.90           | -0.47            | -0.32            | -0.85             | -0.84             | -0.68             | -0.67             | -1.03            | -0.70            |
| 19 | ASN C   | -2.25           | 1.57             | 0.77            | 0.63            | 0.26             | 0.61             | -1.04             | -1.10             | -0.86             | -1.00             | -0.24            | -0.30            |
| 20 | ASN O   | -1.75           | -0.90            | 0.26            | 0.52            | -0.84            | 0.37             | -0.39             | -0.49             | 0.00              | -0.19             | 0.66             | 0.21             |
| 21 | ASN CB  | 0.81            | -0.41            | -0.15           | -0.90           | -0.18            | -0.68            | -0.45             | -0.62             | -0.80             | -0.88             | -1.24            | -0.60            |
| 22 | ASN CG  | 0.24            | -0.35            | 0.39            | -0.17           | -0.52            | -0.87            | -0.92             | -0.70             | -0.94             | -0.80             | -0.94            | -0.05            |
| 23 | ASN OD1 | -0.91           | -0.43            | 0.30            | 0.20            | -0.45            | 0.39             | -0.09             | -0.07             | -0.12             | -0.13             | 0.52             | -0.54            |
| 24 | ASN ND2 | 0.27            | -0.32            | -0.09           | -0.53           | -0.02            | 0.21             | -0.10             | 0.05              | -0.41             | -0.23             | -0.53            | -0.57            |
| 25 | ASP N   | 1.51            | 0.29             | -2.59           | -1.64           | 0.41             | 0.98             | 0.51              | 0.13              | 0.06              | -0.04             | 0.31             | -0.36            |
| 26 | ASP CA  | 0.90            | 0.32             | 1.51            | -0.64           | -0.67            | -0.41            | -0.61             | -0.71             | -0.87             | -0.89             | -1.17            | -1.05            |
| 27 | ASP C   | -2.54           | 0.62             | 2.18            | 0.12            | 0.69             | 0.11             | -0.75             | -0.86             | -0.97             | -0.66             | -0.08            | -0.04            |
| 28 | ASP O   | -1.87           | -0.56            | 0.47            | 0.63            | -0.85            | 0.52             | -0.30             | -0.39             | 0.01              | -0.06             | 0.85             | 0.09             |
| 29 | ASP CB  | 0.69            | -0.43            | 0.27            | -0.40           | -0.02            | 0.07             | -0.21             | -0.11             | -0.78             | -0.84             | -0.76            | -0.86            |
| 30 | ASP CG  | 0.04            | 0.18             | 0.59            | 0.21            | -0.38            | 0.25             | -0.31             | -0.12             | -0.64             | -0.70             | 0.12             | -0.52            |
| 31 | ASP OD1 | -0.47           | 0.15             | 0.68            | 0.93            | -0.04            | 1.74             | 0.80              | 0.41              | -0.29             | -0.29             | 0.89             | -0.96            |
| 32 | ASP OD2 | -0.16           | -0.15            | 0.76            | 0.95            | 0.29             | 1.44             | 0.34              | 0.32              | -0.42             | -0.28             | 1.03             | -1.09            |
| 33 | CYS N   | 1.10            | 0.38             | -2.21           | -2.21           | 0.23             | 0.74             | -0.06             | 0.58              | 0.17              | 0.39              | 0.29             | -0.09            |
| 34 | CYS CA  | 1.21            | -0.57            | 1.27            | -1.02           | -0.67            | -0.20            | -0.79             | -0.77             | -0.53             | -0.35             | -0.77            | -0.69            |
| 35 | CYS C   | -1.97           | 0.30             | 1.05            | 0.39            | -0.02            | 1.14             | -1.42             | -1.16             | -0.80             | -0.65             | -0.20            | -0.27            |
| 36 | CYS O   | -2.03           | -1.57            | -0.04           | 0.10            | -0.84            | 0.58             | -0.84             | -0.31             | -0.20             | 0.03              | 0.66             | 0.06             |
| 37 | CYS CB  | 0.56            | -0.72            | -0.38           | -0.87           | -0.82            | -1.03            | -0.74             | -0.78             | -0.68             | -0.81             | -1.05            | -0.44            |
| 38 | CYS SG  | -0.14           | -0.77            | -0.94           | -0.03           | -0.94            | -0.34            | -0.56             | -0.70             | -0.28             | -0.42             | -0.28            | 0.25             |
| 39 | GLN N   | 1.65            | 0.65             | -2.56           | -2.09           | 0.92             | 1.40             | 0.20              | 0.14              | 0.21              | 0.21              | 0.39             | 0.13             |
| 40 | GLN CA  | 0.97            | -0.66            | 0.39            | -0.93           | -0.55            | -0.39            | -0.79             | -0.78             | -0.25             | -0.78             | -1.10            | -0.50            |
| 41 | GLN C   | -2.44           | -0.12            | 1.91            | 0.49            | -0.15            | -0.39            | -0.62             | -1.01             | -0.37             | -0.32             | -0.05            | 0.17             |
| 42 | GLN O   | -1.87           | -1.08            | 0.71            | 0.54            | -0.88            | 0.47             | -0.38             | -0.44             | -0.03             | 0.15              | 1.20             | 0.28             |
| 43 | GLN CB  | 1.31            | -0.55            | 0.66            | -0.97           | -0.31            | -0.71            | -0.64             | -0.54             | -0.70             | -0.85             | -1.00            | -0.47            |
| 44 | GLN CG  | 1.00            | -0.50            | -0.13           | -0.94           | -0.03            | -0.96            | -0.64             | -0.74             | -0.86             | -0.87             | -1.44            | -0.56            |
| 45 | GLN CD  | 1.38            | -0.75            | 0.14            | 0.45            | -0.55            | -0.95            | -1.17             | -0.88             | -1.03             | -1.06             | -1.13            | -0.48            |
| 46 | GLN OE1 | -0.19           | -0.81            | 0.17            | 0.49            | -0.10            | 0.51             | -0.39             | -0.13             | -0.44             | -0.34             | 0.24             | -0.69            |
| 47 | GLN NE2 | 0.65            | -0.24            | 0.00            | -0.20           | 0.02             | 0.21             | -0.24             | -0.14             | -0.40             | -0.42             | -0.55            | -0.60            |
| 48 | GLU N   | 1.54            | 0.53             | -2.51           | -1.65           | 1.03             | 1.08             | 0.30              | 0.08              | 0.05              | 0.28              | 0.24             | 0.33             |
| 49 | GLU CA  | 0.99            | -0.37            | 0.81            | -0.95           | -0.60            | -0.46            | -0.68             | -0.80             | -0.53             | -0.58             | -0.79            | -0.35            |
| 50 | GLU C   | -2.50           | 1.28             | 1.27            | 0.77            | 0.68             | 0.39             | -1.01             | -0.91             | -0.72             | -0.23             | -0.03            | 0.02             |
| 51 | GLU O   | -1.72           | -0.92            | 0.56            | 0.93            | -0.75            | 0.40             | -0.34             | -0.20             | 0.11              | 0.19              | 1.09             | 0.39             |
| 52 | GLU CB  | 1.15            | -0.45            | 0.18            | -0.55           | -0.01            | -0.06            | -0.27             | -0.35             | -0.74             | -0.64             | -0.86            | -0.39            |
| 53 | GLU CG  | 1.18            | 0.03             | 0.45            | -0.20           | 0.07             | -0.38            | -0.22             | -0.36             | -0.71             | -0.75             | -0.93            | -0.77            |
| 54 | GLU CD  | 1.18            | -0.24            | 0.81            | 0.87            | -0.15            | -0.04            | -0.50             | -0.43             | -0.93             | -0.87             | 0.04             | -0.52            |
| 55 | GLU OE1 | 0.60            | -0.34            | 0.75            | 1.39            | 0.40             | 1.38             | 0.40              | 0.38              | -0.36             | -0.34             | 0.96             | -0.94            |
| 56 | GLU OE2 | 0.51            | 0.07             | 0.81            | 1.29            | 0.49             | 1.17             | 0.64              | 0.32              | -0.31             | -0.34             | 0.84             | -0.96            |
| 57 | GLY N   | 1.08            | 0.32             | -2.11           | -1.67           | 0.21             | -0.41            | -0.16             | -0.44             | -0.37             | -0.26             | -0.43            | -0.21            |
| 58 | GLY CA  | 0.55            | -0.23            | -0.31           | -0.73           | -0.27            | -0.96            | -0.45             | -0.67             | -0.84             | -0.87             | -1.37            | -0.73            |
| 59 | GLY C   | -1.71           | 0.10             | 0.97            | 0.18            | -0.25            | -0.50            | -1.21             | -1.03             | -1.26             | -0.91             | -0.96            | -0.63            |
| 60 | GLY O   | -1.62           | -1.00            | 0.35            | 0.40            | -0.67            | 0.50             | -0.66             | -0.51             | -0.46             | -0.20             | 0.74             | -0.11            |
| 61 | HIS N   | 2.16            | 0.91             | -2.55           | -1.87           | 0.64             | 2.23             | 0.67              | 0.00              | 0.24              | 0.12              | 0.23             | 0.22             |
| 62 | HIS CA  | 0.54            | -0.58            | 0.40            | -0.91           | -0.73            | -0.36            | -0.52             | -0.92             | -0.65             | -1.08             | -0.94            | -1.21            |
| 63 | HIS C   | -2.37           | -0.28            | -0.22           | 0.15            | -0.43            | -0.04            | -1.13             | -1.44             | -0.78             | -0.95             | -0.82            | -0.26            |
| 64 | HIS O   | -2.05           | -1.22            | 0.53            | 0.32            | -0.87            | 0.11             | -0.54             | -0.67             | -0.09             | -0.55             | 0.37             | -0.18            |
| 65 | HIS CB  | 0.17            | -0.64            | 0.22            | -0.70           | -0.56            | -1.24            | -0.91             | -0.79             | -1.16             | -1.14             | -1.47            | -0.80            |
| 66 | HIS CG  | 1.58            | -0.39            | -0.22           | 0.19            | -1.07            | -1.34            | -1.19             | -1.19             | -1.39             | -1.14             | -1.76            | -0.67            |
| 67 | HIS ND1 | -0.29           | -0.47            | -0.06           | -0.61           | -0.30            | -0.64            | -0.63             | -0.41             | -0.82             | -0.67             | -0.88            | -1.42            |
| 68 | HIS CD2 | 0.35            | -0.49            | -0.06           | -0.13           | -0.47            | -1.27            | -0.83             | -0.63             | -0.84             | -0.76             | -1.11            | -0.83            |
| 69 | HIS CE1 | 0.50            | -0.26            | -0.11           | 0.05            | -0.30            | -1.13            | -0.67             | -0.56             | -0.93             | -0.78             | -0.98            | -0.63            |
| 70 | HIS NE2 | 0.89            | 0.03             | 0.27            | 0.15            | -0.24            | -0.46            | -0.27             | -0.27             | -0.55             | -0.61             | -0.74            | -0.97            |
| 71 | ILE N   | 1.20            | 0.40             | -2.15           | -2.30           | 0.75             | 1.89             | 0.69              | 0.68              | 0.27              | 0.86              | 0.99             | 0.12             |
| 72 | ILE CA  | 0.50            | -0.70            | 0.65            | -1.43           | -0.88            | -0.43            | -0.45             | -0.71             | -0.20             | -0.59             | -0.63            | -0.38            |
| 73 | ILE C   | -2.45           | 0.85             | 2.65            | 0.99            | -0.09            | 1.90             | -0.99             | -1.08             | -0.32             | -0.22             | 1.60             | 0.60             |
| 74 | ILE O   | -2.25           | -1.45            | 0.53            | 0.14            | -0.90            | 0.77             | -0.64             | -0.52             | 0.10              | 0.30              | 1.11             | 0.22             |
| 75 | ILE CB  | 0.94            | -1.17            | 0.15            | -1.23           | -1.16            | -0.26            | -0.63             | -0.65             | -0.70             | -0.63             | -0.80            | -0.33            |
| 76 | ILE CG1 | 0.67            | -0.73            | -1.14           | -0.96           | -1.11            | -1.20            | -0.96             | -0.95             | -0.74             | -0.71             | -0.90            | -0.13            |
| 77 | ILE CG2 | 0.05            | -0.51            | -0.41           | -0.18           | -0.98            | -1.25            | -1.12             | -1.00             | -0.97             | -0.87             | -1.15            | -0.42            |
| 78 | ILE CD1 | 0.51            | -0.83            | -0.81           | 0.00            | -1.09            | -1.58            | -1.05             | -1.11             | -0.85             | -0.82             | -0.98            | -0.30            |
| 79 | LEU N   | 1.55            | 0.35             | -2.25           | -2.13           | 1.01             | 1.09             | 0.32              | 0.29              | 0.26              | 0.36              | 0.35             | 0.04             |
| 80 | LEU CA  | 0.94            | -0.70            | 2.23            | -1.18           | -1.32            | -0.25            | -1.01             | -1.20             | -0.60             | -0.56             | -0.39            | -0.36            |
| 81 | LEU C   | -2.31           | 0.99             | 1.37            | 0.53            | -0.11            | 0.60             | -1.01             | -0.75             | -0.66             | -0.47             | 0.83             | 0.05             |
| 82 | LEU O   | -2.16           | -1.18            | 0.43            | 0.51            | -1.06            | 0.15             | -0.56             | -0.48             | -0.04             | -0.14             | 1.17             | -0.07            |

Potential coefficients are the negative log-odds ratio of the observed contact area frequencies to the expected frequencies, based on a random distribution of contacts.

Favorable (negative) contacts are shaded.

Table 3. (continued)

|         |     | 149<br>TYR<br>N | 150<br>TYR<br>CA | 151<br>TYR<br>C | 152<br>TYR<br>O | 153<br>TYR<br>CB | 154<br>TYR<br>CG | 155<br>TYR<br>CD1 | 156<br>TYR<br>CD2 | 157<br>TYR<br>CE1 | 158<br>TYR<br>CE2 | 159<br>TYR<br>CZ | 160<br>TYR<br>OH |
|---------|-----|-----------------|------------------|-----------------|-----------------|------------------|------------------|-------------------|-------------------|-------------------|-------------------|------------------|------------------|
| 83 LEU  | CB  | 0.81            | -0.96            | 0.01            | -1.07           | -0.84            | -0.80            | -0.86             | -0.76             | -0.85             | -0.77             | -1.02            | -0.47            |
| 84 LEU  | CG  | 0.64            | -0.78            | -0.90           | -1.19           | -0.73            | -0.70            | -0.77             | -0.79             | -0.77             | -0.60             | -0.73            | -0.17            |
| 85 LEU  | CD1 | 0.43            | -0.85            | -0.97           | -0.03           | -1.03            | -1.39            | -1.02             | -1.05             | -0.75             | -0.81             | -0.98            | -0.44            |
| 86 LEU  | CD2 | 0.57            | -0.67            | -0.58           | -0.04           | -0.94            | -1.24            | -0.95             | -1.06             | -0.86             | -0.88             | -0.90            | -0.45            |
| 87 LYS  | N   | 1.80            | 0.30             | -2.49           | -1.92           | 0.62             | 1.28             | 0.32              | -0.27             | 0.30              | 0.13              | 0.29             | -0.01            |
| 88 LYS  | CA  | 0.58            | -0.90            | -0.06           | -1.24           | -0.82            | -1.44            | -1.02             | -1.20             | -0.89             | -0.90             | -1.11            | -0.77            |
| 89 LYS  | C   | -2.41           | 0.87             | 3.45            | 1.03            | -0.14            | 0.11             | -1.14             | -1.43             | -0.99             | -0.73             | 0.46             | 0.27             |
| 90 LYS  | O   | -1.74           | -1.32            | 0.37            | 0.43            | -0.73            | 0.28             | -0.44             | -0.51             | -0.22             | -0.21             | 0.78             | 0.02             |
| 91 LYS  | CB  | 1.02            | -0.76            | 0.04            | -0.85           | -0.06            | -0.86            | -0.60             | -0.66             | -0.97             | -1.17             | -1.37            | -0.52            |
| 92 LYS  | CG  | 0.81            | -0.12            | -0.61           | -0.71           | -0.09            | -0.91            | -0.58             | -0.54             | -0.94             | -0.85             | -1.52            | -0.67            |
| 93 LYS  | CD  | 1.58            | -0.27            | -0.13           | -0.08           | 0.23             | -0.56            | -0.31             | -0.23             | -0.72             | -0.81             | -1.39            | -1.05            |
| 94 LYS  | CE  | 1.54            | 0.19             | 0.44            | 0.09            | 0.24             | -0.56            | -0.11             | 0.06              | -0.52             | -0.31             | -0.89            | -0.79            |
| 95 LYS  | NZ  | 1.97            | 0.81             | 0.97            | -0.04           | 1.16             | 1.06             | 0.83              | 1.03              | 0.40              | 0.45              | 0.35             | -0.34            |
| 96 MET  | N   | 1.80            | 0.41             | -2.34           | -2.03           | 1.17             | 1.25             | 0.27              | 0.43              | 0.54              | 0.25              | 0.80             | 0.13             |
| 97 MET  | CA  | 0.41            | -0.37            | 1.74            | -1.18           | -1.07            | -0.91            | -1.12             | -1.13             | -0.92             | -0.71             | -0.89            | -0.42            |
| 98 MET  | C   | -2.30           | 1.78             | 1.63            | 0.02            | -0.41            | 0.04             | -0.94             | -1.21             | -0.96             | -1.05             | -0.38            | -0.01            |
| 99 MET  | O   | -2.37           | -1.24            | -0.27           | 0.18            | -1.31            | -0.07            | -0.83             | -0.63             | 0.00              | -0.27             | 0.60             | 0.16             |
| 100 MET | CB  | 0.63            | -1.09            | -0.38           | -1.20           | -0.95            | -1.29            | -0.94             | -1.07             | -0.80             | -1.01             | -1.15            | -0.60            |
| 101 MET | CG  | 0.25            | -0.99            | -1.08           | -0.93           | -0.88            | -1.18            | -0.99             | -0.72             | -0.90             | -0.91             | -1.25            | -0.39            |
| 102 MET | SD  | 0.12            | -1.32            | -0.86           | 0.49            | -1.26            | -0.93            | -1.11             | -1.12             | -0.74             | -0.76             | -0.12            | -0.02            |
| 103 MET | CE  | 0.28            | -0.67            | -0.86           | -0.26           | -1.20            | -1.51            | -1.09             | -1.05             | -0.92             | -0.88             | -1.18            | -0.69            |
| 104 PHE | N   | 1.44            | 1.33             | -2.13           | -2.19           | 0.50             | 1.41             | 0.40              | 0.33              | 0.27              | 0.42              | 0.15             | -0.03            |
| 105 PHE | CA  | 0.79            | -1.02            | -0.33           | -1.52           | -0.71            | -0.73            | -0.94             | -0.78             | -0.78             | -0.61             | -1.04            | -0.58            |
| 106 PHE | C   | -2.24           | 0.68             | 2.33            | 0.06            | -0.32            | 1.01             | -1.03             | -0.91             | -0.74             | -0.70             | -0.17            | 0.45             |
| 107 PHE | O   | -2.24           | -1.40            | 0.48            | 0.13            | -1.03            | 1.08             | -0.66             | -0.29             | 0.07              | 0.14              | 1.42             | 0.26             |
| 108 PHE | CB  | 0.53            | -1.01            | -0.51           | -0.97           | -0.69            | -0.91            | -0.88             | -0.81             | -0.89             | -0.97             | -1.12            | -0.51            |
| 109 PHE | CG  | 0.40            | -0.48            | 0.04            | 0.52            | -0.96            | -1.07            | -1.17             | -0.99             | -0.93             | -0.79             | -0.51            | 0.12             |
| 110 PHE | CD1 | 0.15            | -0.94            | -1.23           | -0.76           | -1.03            | -1.25            | -0.96             | -1.08             | -0.78             | -0.87             | -0.96            | -0.20            |
| 111 PHE | CD2 | 0.19            | -0.99            | -0.92           | -0.45           | -0.83            | -1.21            | -0.99             | -0.84             | -0.72             | -0.85             | -0.92            | -0.20            |
| 112 PHE | CE1 | 0.08            | -0.81            | -1.02           | 0.09            | -1.30            | -1.60            | -1.11             | -1.08             | -0.72             | -0.77             | -0.72            | -0.20            |
| 113 PHE | CE2 | 0.14            | -0.90            | -0.74           | 0.08            | -1.23            | -1.43            | -1.02             | -1.03             | -0.69             | -0.74             | -0.67            | -0.15            |
| 114 PHE | CZ  | 0.46            | -0.98            | -0.47           | 0.28            | -1.22            | -1.65            | -1.08             | -1.07             | -0.63             | -0.79             | -0.93            | -0.35            |
| 115 PRO | N   | 2.88            | 0.12             | -1.59           | -1.35           | 0.05             | -0.92            | -1.35             | -1.51             | -1.27             | -1.39             | -1.32            | -1.01            |
| 116 PRO | CA  | 0.97            | -0.80            | 0.47            | -0.94           | -0.38            | -1.67            | -1.03             | -1.14             | -0.98             | -1.23             | -1.52            | -0.94            |
| 117 PRO | C   | -2.68           | 0.22             | 2.22            | 0.48            | 0.16             | 0.47             | -0.91             | -0.92             | -0.64             | -0.49             | 0.18             | -0.18            |
| 118 PRO | O   | -1.78           | -0.62            | 0.44            | 0.44            | -0.82            | 0.45             | -0.54             | -0.62             | -0.46             | -0.52             | 0.60             | -0.68            |
| 119 PRO | CB  | 0.23            | 0.02             | -0.57           | -0.11           | -0.37            | -1.20            | -0.66             | -0.77             | -0.96             | -1.04             | -1.45            | -0.84            |
| 120 PRO | CG  | 0.62            | -0.30            | -0.36           | 0.01            | -0.53            | -1.43            | -0.83             | -0.76             | -1.04             | -1.07             | -1.48            | -0.90            |
| 121 PRO | CD  | 1.13            | -0.19            | -1.61           | -1.08           | -0.42            | -1.64            | -0.91             | -1.00             | -1.03             | -1.12             | -1.56            | -1.10            |
| 122 SER | N   | 1.37            | 0.91             | -2.47           | -1.92           | 0.24             | 1.12             | 0.27              | 0.05              | 0.21              | 0.25              | 0.02             | -0.12            |
| 123 SER | CA  | 1.07            | -0.40            | 0.63            | -0.92           | -0.61            | -1.00            | -0.64             | -0.51             | -0.67             | -0.68             | -0.84            | -0.68            |
| 124 SER | C   | -2.49           | 1.20             | 1.46            | 0.70            | 0.29             | 0.14             | -1.26             | -0.67             | -0.64             | -0.43             | 0.03             | -0.21            |
| 125 SER | O   | -1.91           | -1.02            | 0.57            | 0.38            | -0.91            | 0.49             | -0.47             | -0.27             | -0.17             | 0.02              | 0.91             | 0.06             |
| 126 SER | CB  | 0.44            | -0.31            | -0.13           | -0.58           | -0.26            | -0.43            | -0.48             | -0.36             | -0.71             | -0.59             | -0.88            | -0.46            |
| 127 SER | OG  | -0.75           | -0.49            | 0.00            | -0.57           | -0.36            | 0.56             | -0.11             | 0.09              | -0.17             | -0.03             | 0.52             | -0.25            |
| 128 THR | N   | 1.08            | 0.61             | -2.34           | -1.90           | 0.59             | 1.66             | 0.77              | 0.45              | 0.61              | 0.77              | 1.69             | 0.44             |
| 129 THR | CA  | 1.05            | -0.44            | 0.91            | -1.36           | -0.58            | -0.21            | -0.62             | -0.63             | -0.41             | -0.59             | -0.27            | -0.50            |
| 130 THR | C   | -2.12           | -0.23            | 1.93            | 0.82            | -0.25            | 0.19             | -0.79             | -1.08             | -0.66             | -0.61             | -0.03            | -0.23            |
| 131 THR | O   | -1.88           | -1.28            | 0.42            | 0.41            | -0.73            | 0.58             | -0.38             | -0.47             | 0.01              | 0.04              | 1.20             | 0.30             |
| 132 THR | CB  | 0.56            | -0.60            | -0.46           | -0.86           | -0.25            | -0.27            | -0.31             | -0.65             | -0.34             | -0.64             | -0.50            | -0.42            |
| 133 THR | OG1 | -0.31           | -0.79            | 0.04            | -0.50           | -0.34            | 0.58             | -0.14             | -0.04             | -0.14             | -0.07             | 0.37             | -0.21            |
| 134 THR | CG2 | 0.34            | -0.05            | -0.54           | -0.16           | -0.48            | -0.51            | -0.46             | -0.50             | -0.60             | -0.68             | -0.99            | -0.38            |
| 135 TRP | N   | 1.37            | -0.10            | -2.44           | -2.21           | 0.47             | 0.80             | 0.20              | 0.29              | 0.26              | 0.45              | -0.02            | -0.31            |
| 136 TRP | CA  | 0.77            | -1.44            | 3.40            | -1.25           | -1.24            | -0.11            | -1.07             | -0.88             | -0.52             | -0.50             | -0.47            | -0.30            |
| 137 TRP | C   | -2.18           | 0.29             | 1.56            | 0.29            | -0.36            | 0.47             | -1.51             | -1.28             | -0.86             | -0.76             | 1.25             | -0.30            |
| 138 TRP | O   | -2.18           | -1.29            | 0.97            | 0.12            | -1.13            | 0.54             | -0.64             | -0.59             | -0.06             | -0.08             | 2.00             | 0.15             |
| 139 TRP | CB  | 0.37            | -1.17            | -0.40           | -1.07           | -0.86            | -0.93            | -1.13             | -0.99             | -1.10             | -0.93             | -0.99            | -0.52            |
| 140 TRP | CG  | 0.06            | -0.94            | -0.17           | 0.27            | -0.95            | -0.80            | -1.34             | -0.96             | -0.98             | -0.90             | -0.33            | -0.23            |
| 141 TRP | CD1 | -0.04           | -1.01            | -1.06           | -0.86           | -0.97            | -1.09            | -1.01             | -0.87             | -0.71             | -0.90             | -1.13            | -0.34            |
| 142 TRP | CD2 | 0.47            | -0.81            | -0.69           | 0.77            | -1.28            | -0.52            | -1.23             | -1.17             | -0.49             | 0.10              | 1.20             | 0.36             |
| 143 TRP | NE1 | 0.02            | -0.60            | -0.75           | -1.00           | -0.71            | -0.80            | -0.69             | -0.43             | -0.57             | -0.51             | -0.91            | -0.88            |
| 144 TRP | CE2 | 0.28            | -0.60            | 0.08            | 1.12            | -1.48            | 0.05             | -1.25             | -0.78             | -0.29             | 0.10              | 0.85             | 0.56             |
| 145 TRP | CE3 | -0.52           | -0.88            | -2.02           | -0.50           | -1.51            | -1.71            | -1.05             | -1.15             | -0.55             | -0.57             | -0.83            | -0.01            |
| 146 TRP | CZ2 | 0.52            | -0.78            | -0.83           | -0.28           | -1.00            | -1.21            | -0.78             | -0.85             | -0.45             | -0.78             | -0.75            | -0.44            |
| 147 TRP | CZ3 | -0.24           | -1.10            | -1.57           | -0.32           | -1.27            | -1.17            | -0.78             | -1.05             | -0.73             | -0.76             | -0.44            | 0.10             |
| 148 TRP | CH2 | 0.21            | -0.78            | -1.23           | 0.01            | -1.15            | -1.06            | -0.79             | -1.16             | -0.72             | -0.66             | -0.88            | -0.25            |
| 149 TYR | N   | 1.14            | 0.31             | -1.96           | -2.04           | 0.36             | 1.12             | 0.33              | 0.09              | 0.08              | 0.49              | 0.43             | -0.25            |
| 150 TYR | CA  | 0.34            | -0.90            | 1.52            | -1.41           | -0.78            | -0.94            | -0.77             | -1.10             | -0.61             | -0.66             | -0.88            | -0.58            |
| 151 TYR | C   | -1.92           | 1.55             | 2.77            | 0.59            | -0.24            | 0.93             | -0.80             | -1.33             | -0.75             | -0.45             | 0.31             | 0.04             |
| 152 TYR | O   | -2.04           | -1.45            | 0.61            | 0.37            | -0.95            | 0.95             | -0.39             | -0.47             | -0.03             | 0.13              | 0.87             | 0.06             |
| 153 TYR | CB  | 0.37            | -0.76            | -0.23           | -0.93           | -0.90            | -1.19            | -0.81             | -0.97             | -0.96             | -0.91             | -1.23            | -0.48            |
| 154 TYR | CG  | 1.17            | -0.93            | 0.94            | 0.96            | -1.19            | -1.52            | -1.27             | -1.34             | -0.80             | -0.96             | -0.84            | 0.01             |
| 155 TYR | CD1 | 0.37            | -0.76            | -0.80           | -0.41           | -0.80            | -1.28            | -1.06             | -1.03             | -0.72             | -0.85             | -0.98            | -0.12            |
| 156 TYR | CD2 | 0.13            | -1.09            | -1.32           | -0.49           | -0.96            | -1.34            | -1.03             | -0.87             | -0.84             | -0.74             | -0.91            | -0.39            |
| 157 TYR | CE1 | 0.12            | -0.59            | -0.74           | -0.06           | -0.96            | -0.80            | -0.71             | -0.84             | -0.39             | -0.45             | -0.35            | 0.05             |
| 158 TYR | CE2 | 0.54            | -0.64            | -0.44           | 0.08            | -0.91            | -0.96            | -0.84             | -0.74             | -0.45             | -0.51             | -0.28            | -0.28            |
| 159 TYR | CZ  | 0.48            | -0.86            | 0.33            | 0.83            | -1.23            | -0.84            | -0.98             | -0.90             | -0.35             | -0.27             | 0.87             | 0.61             |
| 160 TYR | OH  | -0.25           | -0.60            | 0.01            | 0.02            | -0.47            | 0.03             | -0.10             | -0.38             | 0.09              | -0.25             | 0.62             | -0.21            |
| 161 VAL | N   | 1.41            | 0.25             | -1.94           | -2.29           | 0.70             | 1.11             | 0.35              | 0.50              | 0.56              | 0.82              | 0.76             | 0.21             |
| 162 VAL | CA  | 1.35            | -0.80            | 0.91            | -1.55           | -0.79            | -0.32            | -0.72             | -0.74             | -0.36             | -0.47             | -0.23            | -0.39            |
| 163 VAL | C   | -2.10           | 0.63             | 3.70            | 1.23            | -0.20            | 1.04             | -1.25             | -1.14             | -0.66             | -0.11             | 0.50             | -0.02            |
| 164 VAL | O   | -2.23           | -1.45            | 0.61            | 0.10            | -0.91            | 0.74             | -0.61             | -0.43             | 0.05              | 0.23              | 1.27             | 0.22             |
| 165 VAL | CB  | 0.61            | -0.80            | 0.20            | -1.05           | -1.09            | -0.89            | -0.68             | -0.73             | -0.79             | -0.67             | -0.73            | -0.22            |
| 166 VAL | CG1 | 0.21            | -0.49            | -0.66           | -0.32           | -0.95            | -1.08            | -0.93             | -0.99             | -0.82             | -0.79             | -1.07            | -0.35            |
| 167 VAL | CG2 | 0.66            | -0.56            | -0.83           | -0.52           | -0.92            | -1.01            | -0.82             | -0.86             | -0.78             | -0.82             | -0.91            | -0.21            |

Potential coefficients are the negative log-odds ratio of the observed contact area frequencies to the expected frequencies, based on a random distribution of contacts.

Favorable (negative) contacts are shaded.

Table 3. (continued)

|        |     | 161<br>VAL<br>N | 162<br>VAL<br>CA | 163<br>VAL<br>C | 164<br>VAL<br>O | 165<br>VAL<br>CB | 166<br>VAL<br>CG1 | 167<br>VAL<br>CG2 |         |     | 161<br>VAL<br>N | 162<br>VAL<br>CA | 163<br>VAL<br>C | 164<br>VAL<br>O | 165<br>VAL<br>CB | 166<br>VAL<br>CG1 | 167<br>VAL<br>CG2 |
|--------|-----|-----------------|------------------|-----------------|-----------------|------------------|-------------------|-------------------|---------|-----|-----------------|------------------|-----------------|-----------------|------------------|-------------------|-------------------|
| 0 SAS  | SAS | 2.27            | 1.99             | 2.18            | 1.46            | 1.77             | 1.43              | 1.54              | 83 LEU  | CB  | 1.11            | -1.26            | 0.28            | -1.14           | -1.00            | -0.97             | -1.09             |
| 1 ALA  | N   | 1.33            | 0.86             | -2.64           | -2.08           | 0.61             | 0.07              | 0.20              | 84 LEU  | CG  | 0.87            | -0.69            | -0.47           | -1.36           | -0.32            | -1.20             | -1.21             |
| 2 ALA  | CA  | 0.79            | -0.58            | 0.59            | -0.91           | -1.10            | -0.74             | -0.94             | 85 LEU  | CD1 | 0.41            | -1.10            | -0.90           | -0.08           | -0.84            | -1.32             | -1.28             |
| 3 ALA  | C   | -2.12           | 1.39             | 2.71            | 0.71            | 0.16             | -0.78             | -0.77             | 86 LEU  | CD2 | 0.71            | -0.71            | -0.51           | 0.07            | -0.93            | -1.29             | -1.26             |
| 4 ALA  | O   | -2.10           | -0.92            | 1.06            | 0.37            | -1.13            | -0.16             | -0.57             | 87 LYS  | N   | 1.64            | 0.93             | -2.65           | -1.92           | 1.16             | 0.32              | 0.69              |
| 5 ALA  | CB  | 0.67            | -0.93            | -0.48           | -0.73           | -0.70            | -0.96             | -0.90             | 88 LYS  | CA  | 1.04            | -0.58            | 1.23            | -0.91           | -1.07            | -0.39             | -0.53             |
| 6 ARG  | N   | 1.21            | 1.46             | -2.65           | -1.85           | 1.10             | 0.34              | 0.63              | 89 LYS  | C   | -2.21           | 0.97             | 3.59            | 1.09            | 0.15             | -0.59             | -0.61             |
| 7 ARG  | CA  | 0.70            | -0.58            | 1.55            | -1.04           | -0.67            | -0.50             | -0.56             | 90 LYS  | O   | -1.88           | -1.16            | 0.94            | 0.45            | -1.01            | 0.06              | -0.20             |
| 8 ARG  | C   | -2.15           | 1.52             | 2.59            | 1.30            | 0.39             | -0.60             | -0.55             | 91 LYS  | CB  | 1.09            | -0.61            | -0.09           | -0.73           | -0.35            | -0.32             | -0.37             |
| 9 ARG  | O   | -1.93           | -1.27            | 1.31            | 0.51            | -0.89            | -0.09             | -0.33             | 92 LYS  | CG  | 1.11            | 0.25             | -0.57           | -0.69           | -0.10            | -0.58             | -0.30             |
| 10 ARG | CB  | 1.15            | -0.60            | 0.38            | -0.69           | -0.36            | -0.33             | -0.35             | 93 LYS  | CD  | 1.29            | -0.12            | -0.34           | 0.07            | 0.28             | -0.27             | 0.03              |
| 11 ARG | CG  | 0.76            | -0.06            | -0.53           | -0.54           | -0.36            | -0.48             | -0.46             | 94 LYS  | CE  | 1.41            | 0.56             | 0.48            | 0.17            | 0.30             | -0.19             | 0.28              |
| 12 ARG | CD  | 1.39            | 0.03             | 0.29            | -0.03           | 0.14             | -0.27             | -0.11             | 95 LYS  | NZ  | 1.93            | 1.22             | 1.13            | 0.15            | 1.70             | 1.09              | 1.45              |
| 13 ARG | NE  | 1.48            | 0.18             | 0.57            | -0.12           | 0.23             | -0.23             | 0.03              | 96 MET  | N   | 1.12            | 1.16             | -2.45           | -2.24           | 0.67             | 0.45              | 0.80              |
| 14 ARG | CZ  | 1.72            | -0.47            | 0.21            | 0.91            | -0.23            | -0.89             | -0.67             | 97 MET  | CA  | 0.93            | -0.74            | 3.54            | -1.16           | -1.26            | -0.36             | -0.71             |
| 15 ARG | NH1 | 1.00            | -0.10            | 0.20            | 0.08            | 0.30             | 0.02              | 0.22              | 98 MET  | C   | -1.99           | 0.72             | 2.19            | 0.61            | 0.24             | -0.52             | -0.57             |
| 16 ARG | NH2 | 1.20            | 0.10             | 0.28            | 0.07            | 0.15             | 0.10              | 0.22              | 99 MET  | O   | -2.28           | -1.12            | 1.09            | 0.36            | -1.30            | -0.09             | -0.50             |
| 17 ASN | N   | 1.34            | 0.94             | -2.74           | -1.78           | 0.52             | 0.44              | 0.84              | 100 MET | CB  | 0.95            | -1.20            | 0.68            | -1.20           | -0.73            | -0.87             | -0.92             |
| 18 ASN | CA  | 0.77            | 0.01             | 0.70            | -0.92           | -1.02            | -0.26             | -0.40             | 101 MET | CG  | 0.52            | -0.80            | -0.59           | -0.86           | -0.61            | -1.02             | -1.07             |
| 19 ASN | C   | -2.18           | 1.12             | 1.91            | 0.41            | 0.53             | -0.32             | -0.44             | 102 MET | SD  | 0.61            | -1.24            | -0.97           | 0.51            | -0.82            | -1.21             | -1.11             |
| 20 ASN | O   | -1.79           | -0.76            | 1.21            | 0.55            | -0.99            | 0.14              | -0.38             | 103 MET | CE  | 0.29            | -1.03            | -1.02           | -0.24           | -0.70            | -1.01             | -0.92             |
| 21 ASN | CB  | 1.10            | -0.37            | 0.14            | -0.65           | -0.36            | -0.23             | -0.30             | 104 PHE | N   | 1.23            | 0.81             | -2.24           | -2.28           | 0.77             | 0.25              | 0.55              |
| 22 ASN | CG  | 0.44            | 0.18             | 0.12            | -0.46           | -0.35            | -0.72             | -0.69             | 105 PHE | CA  | 0.23            | -0.78            | 1.53            | -1.47           | -1.24            | -0.59             | -0.87             |
| 23 ASN | OD1 | -0.71           | -0.14            | 0.77            | 0.45            | -0.33            | 0.01              | 0.08              | 106 PHE | C   | -2.12           | 0.35             | -1.23           | 0.76            | 0.22             | -0.55             | -0.95             |
| 24 ASN | ND2 | 0.42            | 0.04             | 0.07            | -0.35           | 0.14             | -0.12             | 0.12              | 107 PHE | O   | -2.39           | -1.65            | 0.69            | 0.01            | -1.20            | -0.25             | -0.55             |
| 25 ASP | N   | 1.26            | 1.18             | -2.69           | -1.67           | 0.07             | 0.34              | 0.59              | 108 PHE | CB  | 0.79            | -1.10            | -0.33           | -0.97           | -0.94            | -0.91             | -1.06             |
| 26 ASP | CA  | 1.36            | -0.07            | 0.31            | -0.65           | -1.07            | -0.03             | -0.33             | 109 PHE | CG  | 1.55            | -0.36            | 1.67            | 0.27            | -0.90            | -1.24             | -1.23             |
| 27 ASP | C   | -2.42           | 1.64             | 1.52            | 0.82            | 0.58             | -0.46             | -0.33             | 110 PHE | CD1 | 0.74            | -0.79            | -0.98           | -0.81           | -1.02            | -1.13             | -1.07             |
| 28 ASP | O   | -1.80           | -0.50            | 1.12            | 0.74            | -0.96            | 0.21              | -0.24             | 111 PHE | CD2 | 0.42            | -0.60            | -1.09           | -0.54           | -0.90            | -1.16             | -1.13             |
| 29 ASP | CB  | 0.84            | 0.18             | 0.54            | -0.40           | -0.33            | -0.32             | -0.24             | 112 PHE | CE1 | 0.53            | -0.71            | -0.76           | 0.08            | -0.94            | -1.15             | -1.15             |
| 30 ASP | CG  | 0.53            | 0.40             | 1.28            | 0.04            | -0.17            | -0.05             | 0.01              | 113 PHE | CE2 | 0.32            | -0.72            | -0.75           | 0.11            | -1.06            | -1.21             | -1.23             |
| 31 ASP | OD1 | -0.27           | 0.36             | 1.01            | 1.02            | 0.11             | 0.76              | 0.69              | 114 PHE | CZ  | 0.60            | -0.59            | -0.64           | 0.16            | -0.85            | -1.25             | -1.12             |
| 32 ASP | OD2 | -0.26           | -0.03            | 1.33            | 1.15            | 0.11             | 0.66              | 0.59              | 115 PRO | N   | 2.92            | 1.56             | -1.92           | -1.31           | 0.69             | -0.85             | -0.25             |
| 33 CYS | N   | 2.46            | 1.03             | -2.32           | -2.01           | 1.06             | 0.16              | 0.61              | 116 PRO | CA  | 1.26            | -0.55            | -0.17           | -0.98           | -0.90            | -0.53             | -0.58             |
| 34 CYS | CA  | 0.74            | -0.74            | 0.03            | -1.25           | -1.01            | -0.34             | -0.89             | 117 PRO | C   | -2.33           | 2.52             | 0.96            | 0.84            | 0.57             | -0.07             | -0.36             |
| 35 CYS | C   | -1.56           | 1.34             | 2.46            | 0.06            | -0.44            | -0.66             | -0.69             | 118 PRO | O   | -1.81           | -0.58            | 0.34            | 0.57            | -1.11            | 0.10              | -0.43             |
| 36 CYS | O   | -2.03           | -1.18            | 1.25            | 0.09            | -0.98            | -0.03             | -0.52             | 119 PRO | CB  | 0.50            | -0.03            | -0.54           | -0.05           | -0.09            | -0.54             | -0.58             |
| 37 CYS | CB  | 0.71            | -0.66            | -0.40           | -0.72           | -0.91            | -0.74             | -0.80             | 120 PRO | CG  | 1.09            | -0.10            | -0.17           | -0.01           | -0.21            | -0.45             | -0.51             |
| 38 CYS | SG  | 0.15            | -0.66            | -0.69           | -0.13           | -0.70            | -0.88             | -0.99             | 121 PRO | CD  | 1.05            | -0.07            | -1.69           | -1.01           | 0.14             | -0.20             | -0.08             |
| 39 GLN | N   | 1.40            | 1.05             | -2.86           | -1.89           | 0.92             | 0.39              | 0.62              | 122 SER | N   | 1.53            | 1.14             | -2.48           | -1.78           | 0.51             | 0.20              | 0.57              |
| 40 GLN | CA  | 1.17            | -0.42            | 1.60            | -0.86           | -1.19            | -0.46             | -0.62             | 123 SER | CA  | 1.16            | 0.13             | 1.00            | -0.96           | -0.79            | -0.40             | -0.48             |
| 41 GLN | C   | -2.34           | 1.54             | 2.10            | 1.39            | 0.35             | -0.65             | -0.41             | 124 SER | C   | -2.25           | 1.67             | 3.08            | 0.70            | 0.37             | -0.44             | -0.27             |
| 42 GLN | O   | -1.84           | -0.92            | 0.56            | 0.60            | -1.08            | 0.13              | -0.26             | 125 SER | O   | -1.79           | -1.10            | 0.47            | 0.35            | -0.85            | -0.01             | -0.24             |
| 43 GLN | CB  | 1.40            | -0.68            | 0.55            | -0.73           | -0.44            | -0.40             | -0.44             | 126 SER | CB  | 0.76            | -0.51            | -0.15           | -0.51           | -0.26            | -0.45             | -0.35             |
| 44 GLN | CG  | 0.95            | -0.14            | -0.61           | -0.50           | -0.13            | -0.41             | -0.29             | 127 SER | OG  | -0.55           | -0.42            | 0.63            | -0.31           | -0.35            | 0.01              | 0.09              |
| 45 GLN | CD  | 1.22            | -0.73            | 0.81            | 0.74            | -0.14            | -0.85             | -0.51             | 128 THR | N   | 1.24            | 1.24             | -2.30           | -2.01           | 0.49             | 0.48              | 0.70              |
| 46 GLN | OE1 | 0.15            | -0.60            | 0.34            | 0.39            | -0.02            | 0.05              | 0.12              | 129 THR | CA  | 0.70            | -0.77            | 0.87            | -1.54           | -0.74            | -0.42             | -0.35             |
| 47 GLN | NE2 | 0.81            | -0.13            | 0.20            | -0.10           | 0.15             | -0.09             | 0.12              | 130 THR | C   | -2.12           | 0.94             | 0.72            | 0.64            | 0.33             | -0.69             | -0.49             |
| 48 GLU | N   | 1.72            | 1.14             | -2.78           | -1.74           | 0.86             | 0.39              | 0.71              | 131 THR | O   | -2.03           | -1.29            | 1.40            | 0.34            | -0.87            | -0.01             | -0.40             |
| 49 GLU | CA  | 1.09            | -0.45            | 0.14            | -1.01           | -1.13            | -0.39             | -0.52             | 132 THR | CB  | 0.91            | -0.85            | 0.40            | -0.90           | -0.71            | -0.32             | -0.51             |
| 50 GLU | C   | -2.50           | 1.59             | 2.20            | 1.21            | 0.14             | -0.51             | -0.32             | 133 THR | OG1 | -0.21           | -0.25            | 0.10            | -0.52           | -0.51            | -0.16             | -0.05             |
| 51 GLU | O   | -1.79           | -0.92            | 1.69            | 0.77            | -1.05            | 0.07              | -0.25             | 134 THR | CG2 | 0.43            | -0.16            | -0.77           | -0.33           | -0.45            | -0.73             | -0.71             |
| 52 GLU | CB  | 1.46            | -0.36            | 0.50            | -0.48           | -0.29            | -0.39             | -0.19             | 135 TRP | N   | 2.20            | 0.95             | -2.44           | -2.12           | 1.08             | 0.23              | 0.53              |
| 53 GLU | CG  | 0.93            | 0.29             | 0.02            | -0.36           | -0.07            | -0.45             | -0.37             | 136 TRP | CA  | 0.62            | -0.58            | 1.40            | -1.43           | -1.09            | -0.52             | -0.75             |
| 54 GLU | CD  | 1.46            | 0.27             | 0.52            | 0.98            | -0.26            | -0.59             | -0.34             | 137 TRP | C   | -2.20           | 2.12             | 0.57            | -0.07           | -0.39            | -0.53             | -0.97             |
| 55 GLU | OE1 | 0.75            | 0.03             | 0.66            | 1.41            | 0.63             | 0.46              | 0.54              | 138 TRP | O   | -2.23           | -1.31            | 1.79            | 0.25            | -1.28            | -0.12             | -0.55             |
| 56 GLU | OE2 | 0.61            | 0.57             | 1.12            | 1.21            | 0.44             | 0.38              | 0.58              | 139 TRP | CB  | 0.79            | -0.99            | 0.76            | -0.96           | -1.05            | -0.88             | -0.91             |
| 57 GLY | N   | 1.16            | 0.30             | -2.30           | -1.73           | 0.02             | 0.17              | 0.37              | 140 TRP | CG  | 2.06            | -0.67            | 0.21            | 0.38            | -1.01            | -1.11             | -0.90             |
| 58 GLY | CA  | 0.79            | -0.24            | 0.05            | -0.65           | -0.37            | -0.55             | -0.33             | 141 TRP | CD1 | 0.60            | -0.65            | -1.11           | -0.52           | -0.56            | -0.76             | -0.64             |
| 59 GLY | C   | -1.67           | 0.25             | 1.06            | 0.35            | -0.53            | -0.88             | -0.57             | 142 TRP | CD2 | 1.21            | -0.39            | 0.22            | 1.02            | -0.76            | -1.14             | -1.03             |
| 60 GLY | O   | -1.72           | -0.99            | 0.42            | 0.39            | -0.63            | -0.20             | -0.37             | 143 TRP | NE1 | 0.58            | -0.38            | 0.04            | -0.40           | -0.72            | -0.47             | -0.53             |
| 61 HIS | N   | 1.31            | 1.39             | -2.22           | -2.09           | 0.77             | 0.37              | 0.45              | 144 TRP | CE2 | 1.32            | 0.25             | -0.52           | 1.39            | -0.93            | -1.12             | -1.13             |
| 62 HIS | CA  | 0.47            | -0.19            | 2.06            | -1.00           | -0.97            | -0.12             | -0.62             | 145 TRP | CE3 | -0.18           | -0.84            | -2.06           | -0.37           | -1.09            | -1.15             | -1.10             |
| 63 HIS | C   | -2.20           | 1.23             | 1.75            | 0.16            | 0.21             | -0.52             | -0.64             | 146 TRP | CZ2 | 1.03            | -0.19            | -0.62           | 0.23            | -0.53            | -0.76             | -0.68             |
| 64 HIS | O   | -2.02           | -1.22            | 1.39            | 0.30            | -0.83            | -0.03             | -0.49             | 147 TRP | CZ3 | 0.31            | -0.74            | -1.14           | 0.03            | -0.76            | -1.12             | -0.99             |
| 65 HIS | CB  | 1.02            | -0.70            | 0.42            | -0.78           | -0.49            | -0.43             | -0.63             | 148 TRP | CH2 | 0.49            | -0.28            | -0.90           | 0.27            | -0.43            | -1.03             | -0.79             |
| 66 HIS | CG  | 1.84            | 0.10             | 1.73            | -0.20           | -0.72            | -0.56             | -0.87             | 149 TYR | N   | 1.42            | 1.35             | -2.13           | -2.23           | 0.58             | 0.17              | 0.62              |
| 67 HIS | ND1 | -0.31           | 0.08             | 0.48            | -0.38           | -0.36            | 0.00              | -0.18             | 150 TYR | CA  | 0.28            | -0.80            | 0.62            | -1.42           | -0.81            | -0.52             | -0.58             |
| 68 HIS | CD2 | 0.77            | -0.44            | -0.35           | -0.46           | -0.42            | -0.55             | -0.44             | 151 TYR | C   | -1.92           | 0.88             | 3.70            | 0.60            | 0.20             | -0.66             | -0.83             |
| 69 HIS | CE1 | 0.90            | 0.22             | -0.07           | -0.09           | -0.20            | -0.50             | -0.30             | 152 TYR | O   | -2.28           | -1.59            | 1.26            | 0.10            | -1.06            | -0.29             | -0.51             |
| 70 HIS | NE2 | 1.33            | 0.13             | 0.15            | -0.12           | 0.17             | -0.22             | -0.15             | 153 TYR | CB  | 0.73            | -0.78            | -0.20           | -0.91           | -1.09            | -0.96             | -0.92             |
| 71 ILE | N   | 1.19            | 0.69             | -2.06           | -2.39           | 1.04             | 0.35              | 0.54              | 154 TYR | CG  | 1.14            | -0.30            | 0.95            | 0.74            | -0.89            | -1.09             | -1.02             |
| 72 ILE | CA  | 1.10            | -1.38            | 1.89            | -1.63           | -1.46            | -0.53             | -0.88             | 155 TYR | CD1 | 0.38            | -0.70            | -1.24           | -0.62           | -0.68            | -0.93             | -0.82             |
| 73 ILE | C   | -1.87           | 1.77             | 2.24            | 1.56            | -0.25            | -0.53             | -0.69             | 156 TYR | CD2 | 0.53            | -0.72            | -1.14           | -0.45           | -0.72            | -0.99             | -0.86             |
| 74 ILE | O   | -2.43           | -1.82            | 1.22            | 0.09            | -1.29            | -0.13             | -0.60             | 157 TYR |     |                 |                  |                 |                 |                  |                   |                   |
